# Supplementary material
Source: Research Square preprint supplement (doi:10.21203/rs.3.rs-10139914/v1)
Supplement: Supplementary file 1 [file 261292fa0cb261a66d694af5.xlsx]

## Sheet: fig 1
figure 1
a	Fh releative expression (relateive to Rps18)		b	Fh releative expression (relateive to Rps18)		c	D-loop releative expression (relateive to Rps18)			d	Ifnb1 releative expression (relateive to Rps18)			e	Ifnb1 releative expression (relateive to Rps18)
NS	LPS 24hr		NS	LPS 48hr			NS	LPS 48hr			NS	LPS 24hr			NS	LPS 48hr
1	0.821758		1	0.602451			1	2.22417			1	0.419387			1	0.159285
1	0.628148		1	0.539499			1	1.19574			1	0.699694			1	0.268459
1	0.918503		1	0.312384			1	1.48809			1	0.480222			1	0.169031
1	0.968316		1	0.699594			1	1.00266			1	0.722858			1	0.366781
1	0.925792		1	0.795454			1	3.04215			1	0.774707			1	0.120421
1	0.785601		1	0.665665			1	2.53837			1	0.601648			1	0.836998
1	0.868955		1	0.820066			1	2.09406			1	0.606959			1	0.367429
f	D-loop releative expression (relateive to Rps18)
	NS					LPS 48hr
Control	1	1	1	1	1	1.02322	2.6491	3.81331	1.48067	1.46394
Snx9 Knockdown	0.303383	1.04628	0.979776	1.59909	0.852065	0.39412	0.811432	1.19235	0.738851	0.777273
g	Ddx58 releative expression (relateive to Rps18)
	NS							LPS 48hr
Control	1	1	1	1	1	1	1	1.55955	2.79386	1.71142	2.50718	3.54184	2.95348	4.06113
Snx9 Knockdown	0.90924	1.32565	0.847172	0.866907	0.935724	0.90748	0.901543	1.13079	1.9137	1.13314	1.5736	1.74605	2.28769	2.76879
h	Ifih1 releative expression (relateive to Rps18)
	NS							LPS 48hr
Control	1	1	1	1	1	1	1	1.12783	2.27089	1.93695	1.98624	2.6768	2.66618	3.99752
Snx9 Knockdown	0.783621	1.05842	1.12144	0.699033	0.856685	0.934502	0.922155	0.949924	1.03495	1.15713	1.14672	1.27646	2.18837	2.21299
i	Irf1 releative expression (relateive to Rps18)
	NS							LPS 48hr
Control	1	1	1	1	1	1	1	0.963912	1.64444	0.845764	1.60367	1.55825	2.11915	2.67171
Snx9 Knockdown	0.929143	1.16025	0.879451	0.905662	0.764436	1.14438	1.12967	0.655813	1.02511	0.631782	1.01692	0.641404	1.69076	2.37901
j	Irf1 releative expression (relateive to Rps18)
	NS							LPS 48hr
Control	1	1	1	1	1	1	1	2.21093	3.86841	1.97795	3.16766	4.59661	4.70154	6.56061
Snx9 Knockdown	0.941095	1.35472	0.986032	0.746561	0.809837	0.988692	0.972701	1.35711	2.53781	1.34306	2.16951	2.22007	3.77105	3.94817

## Sheet: fig 2
fig 2
a	Ifnb1 releative expression (relateive to Rps18)
	LPS				FHIN
Control	1	1	1	1	5.33125	7.8311	7.10118	3.18335
Snx9 Knockdown	0.550495	0.842777	0.825102	0.543071	4.34657	3.86253	3.30558	1.39737
b	IFN-beta pg/ml
	NS										LPS										FHIN
Control	1	1.38188	1	24.024	26.1455	4.45899	13.9675	9.04266	1	14.7467	208.39	176.823	127.809	90.2779	130.31	213.318	168.554	139.754	400.986	335.203	800.323	291.267	267.17	102.335	247.345	472.958	305.225	282.306	587.823	188.29
Snx9 Knockdown	9.51627	21.9227	10.1637	24.4941	22.8523	27.5162	33.5417	10.7322	51.4495	33.0175	115.535	61.7437	66.6821	61.6271	93.9725	79.9905	56.069	79.9905	206.221	65.5661	146.022	20.8952	159.143	115.046	117.453	83.964	85.0701	243.113	335.666	51.0053
c	Il10 releative expression (relateive to Rps18)
	NS					LPS					LPS+FHIN
Control	1	1	1	1	1	7.96111	62.3484	78.5276	29.3992	67.312	6.04865	21.9792	12.899	9.89257	14.5337
Snx9 Knockdown	2.31908	0.928489	1	0.19949	1.02045	11.1749	30.5027	46.4951	5.61713	63.3272	3.28365	6.12928	5.39515	6.7502	10.0121
d	IL-10 pg/ml
	NS							LPS							LPS+FHIN
Control	60.7382	60.7382	82.5486	69.6361	97.0694	60.2755	56.3728	239.69	409.34	417.713	309.118	217.206	401.019	3.90612	8.88059	17.2125	159.638	45.0382	50.1961	90.6645	13.6398
Snx9 Knockdown	42.4521	50.3593	79.2754	90.3001	98.2086	65.4407	119.504	242.089	249.321	314.255	73.5864	272.581	412.125	305.281	17.9421	11.5622	110.401	12.9414	103.406	130.881	70.8073
e	Tnf releative expression (relateive to Rps18)
	NS					LPS					LPS+FHIN
Control	1	1	1	1	1	119.909	412.394	269.122	61.2769	120.4	119.77	789.844	243.65	79.3985	106.372
Snx9 Knockdown	1	7.06317	1.24379	0.279164	0.578353	109.278	216.436	152.781	23.462	192.008	136.586	184.224	250.695	75.4691	264.756
f	TNF pg/ml
	NS							LPS							LPS+FHIN
Control	9.17326	19.1848	3.61825	5.43174	6.33299	0.839683	4.52719	1811.67	1864.37	1439.52	1548.71	709.042	792.721	247.622	2648.1	2506.76	2576.71	1256.16	998.007	1016.15	222.661
Snx9 Knockdown	25.0445	21.1212	5.43174	0	5.43174	0	14.3774	1668.92	2028.13	1261.88	626.218	519.194	672.838	484.046	2256.68	2153.94	1722.49	475.865	855.126	998.007	401.788
g	Gdf15 releative expression (relateive to Rps18)
	NS				LPS				LPS+FHIN
Control	1	1	1	1	3.56937	2.0736	3.16881	1.47524	8.95516	21.3237	23.8532	18.9206
Snx9 Knockdown	1	1.71242	1.53613	1.02048	2.77121	3.71432	1.91572	3.41828	14.3236	18.2981	23.836	14.631
h	GDF-15 pg/ml
	NS					LPS					LPS+FHIN
Control	79.8496	90.4815	90.1435	92.1972	95.9447	96.8673	113.481	85.109	87.6604	89.1393	175.284	157.891	157.116	156.348	101.47
Snx9 Knockdown	87.3361	97.8021	75.3899	96.4968	100.291	108.968	91.678	87.9862	89.6396	91.8507	120.275	108.531	146.547	174.822	122.328
i	D-loop releative expression (relateive to Rps18)
	LPS				FHIN
Control	1	1	1	1	2.19603	1.87156	3.73165	1.52923
Snx9 Knockdown	2.73154	0.743738	1.9533	0.481741	0.939068	0.825742	1.15746	0.574664
j	Nd4 releative expression (relateive to Rps18)
	LPS			FHIN
Control	1	1	1	2.18416	1.50765	2.46328
Snx9 Knockdown	0.719375	1.03261	1.43303	0.553144	0.332897	0.971012

## Sheet: fig 3
fig 3
a	Ifnb1 releative expression (relateive to Rps18)		b	Ifnb1 releative expression (relateive to Rps18)		c	IFN-beta pg/ml			e	SNX9 relatitve expression (relative to beta-actin)
LPS 1hr	LPS FHIN		LPS 2hr	LPS FHIN		NS	LPS 2hr	LPS FHIN		LPS	LPS FHIN
1	0.42829		1	1.47608		1	8.41432	15.7713		1	1.41557
1	1.31884		1	1.98179		1	17.994	26.845		1	2.19393
1	0.762127		1	1.78242		1	11.2391	21.7702		1	1.04615
1	0.93452		1	1.23259		1	1	19.13		1	1.75462
			1	1.28448						1	1.23793
			1	2.32995						1	3.45305
			1	0.907709
g & h
Protein ID	Gene names	LPS_01 MaxLFQ Intensity	LPS_02 MaxLFQ Intensity	LPS_03 MaxLFQ Intensity	LPS_FHIN_01 MaxLFQ Intensity	LPS_FHIN_02_20260213143455 MaxLFQ Intensity	LPS_FHIN_03 MaxLFQ Intensity
A0A0B4J1G0	Fcgr4	122000000	137000000	113000000	85500000	90600000	108000000
A1L314	Mpeg1	4.13621e+06	5.87193e+06	4971333	3.01877e+06	2359342	2.45794e+06
A2A7S8-2	Kiaa1522	1530120	1.32292e+06	1010429	1.22586e+06	1.13683e+06	1.42403e+06
A2A8Z1	Osbpl9	1.91433e+06	2.17197e+06	1.45175e+06	2.12647e+06	2232226	3.38391e+06
A2AAY5	Sh3pxd2b	305193	555786	316928	0	1499803	0
A2AB59-2	Arhgap27	859349	892518	1.10644e+06	806892	1.45448e+06	1.10846e+06
A2AF47	Dock11	1.46425e+06	1.47662e+06	1.51146e+06	2.82901e+06	1.70078e+06	1.80911e+06
A2AIV8	Card9	1.67924e+06	1.20219e+06	1.35857e+06	2.97391e+06	1.90937e+06	1464993
A2AJ88-2	Pnpla7	0	0	0	0	0	0
A2AJI0-2	Map7d1	2.4298e+06	2.9246e+06	1.7918e+06	2.29571e+06	2.90156e+06	2249880
A2AKB9-2	Dcaf10	1.01336e+06	1.37126e+06	2.13756e+06	2.75815e+06	1.14757e+06	1.04246e+06
A2AN08-3	Ubr4	1.08772e+06	1.0128e+06	825794	981357	1.03561e+06	1.31121e+06
A2APB8	Tpx2	1.11939e+06	1.11584e+06	796506	0	1.772e+06	1397427
A2AQ19	Rtf1	2.16458e+06	871844	1.19947e+06	0	1438289	0
A2AR02	Ppig	4.89971e+06	1.68275e+06	6145386	2.74089e+06	3.08013e+06	2.30408e+06
A2ARA8	Itga8	0	0	1.1606e+06	2.35147e+06	355234	0
A2ARP1-2	Ppip5k1	0	0	0	0	0	404916
A2ASS6	Ttn	21600000	6549107	28300000	31400000	28800000	36500000
A2AWP8-2	Arhgef10l	1.13033e+06	2002540	790356	557624	4476084	1.621e+06
A2BDX3	Mocs3	2.05374e+06	4.58878e+06	4152083	4376137	10900000	2.14517e+06
A2BH40	Arid1a	4.14856e+06	4.46819e+06	1.65041e+06	2.44873e+06	3035975	5.60546e+06
A2BIM8	Mup18	0	0	0	0	0	0
A2RTL5	Rsrc2	1.35462e+06	858877	1.44217e+06	1.21089e+06	1.43247e+06	1.05434e+06
A3KGS3-2	Ralgapa2	0	0	0	0	0	626721
A6H5X4-2	Phf11	283626	0	0	0	481500	546868
A6H5Z3-2	Exoc6b	0	0	0	0	0	0
A6H8H2-2	Dennd4c	2.17881e+06	3272499	1.98622e+06	1.81817e+06	2.67047e+06	2.97546e+06
A6X935-2	Itih4	2.87049e+06	5151814	3600410	3.50274e+06	3753417	2706775
B1AZ99	Otud3	1.28911e+06	1.20768e+06	1.0294e+06	947972	1.82998e+06	743477
B1AZI6	Thoc2	898082	698705	1543201	812469	1.88765e+06	839475
B2RQC6-2	Cad	1.91224e+06	2.20488e+06	1.69895e+06	1.54456e+06	2.30879e+06	2.47203e+06
B2RRD7	Brpf1	978410	449745	942415	510987	872968	359264
B2RXR6	Ankrd44	3.29712e+06	4196865	2.3022e+06	3.39594e+06	3915484	6910660
B2RXS4	Plxnb2	0	605079	0	471397	0	645550
B2RY56	Rbm25	48800000	16200000	54700000	26700000	36200000	21000000
B9EJ86	Osbpl8	1.77699e+06	1.21767e+06	1.30942e+06	1.07038e+06	1.85075e+06	1.13453e+06
C0HKD8	Mfap1a	4.85211e+06	2885585	6662661	2.95688e+06	4.37912e+06	2.75915e+06
D0QMC3	Mndal	6.84332e+06	4560843	5.81885e+06	4588617	7.05648e+06	5505207
D3YVF0	Akap5	0	0	1.06176e+06	3.34555e+06	0	0
D3YXK2	Safb	1.23902e+06	2388483	678253	721097	1.64111e+06	906832
D3YZP9	Ccdc6	272285	0	0	347435	247758	302733
D3Z7P3-2	Gls	1.25399e+06	940608	1059927	2.0254e+06	1.62313e+06	1185036
E1U8D0	Soga1	976428	1.02306e+06	993697	610357	1.51556e+06	1271391
E9PV24-2	Fga	0	0	137698	860159	0	0
E9PVD3	Dchs1	0	0	0	0	0	0
E9PVX6-2	Mki67	3.82265e+06	3.38721e+06	2.79145e+06	1655752	1.34679e+06	0
E9PZJ8	Ascc3	1160629	1.96457e+06	639859	1.20416e+06	1.31498e+06	1.01735e+06
E9Q2M9	Wdfy4	1.63773e+06	961616	1251187	0	866634	1.91355e+06
E9Q309	Cep350	0	0	0	0	0	0
E9Q394-2	Akap13	1.61401e+06	2205541	1.46482e+06	829056	1612521	1.2568e+06
E9Q3L2	Pi4ka	0	0	0	0	0	0
E9Q555	Rnf213	2.76172e+06	2.96509e+06	2310175	2.81856e+06	3.04971e+06	3.28031e+06
E9Q557	Dsp	10000000	8.23014e+06	4.60261e+06	5.12879e+06	3.52968e+06	0
E9Q5C9-2	Nolc1	897038	1132752	1.90807e+06	1.55424e+06	1.31834e+06	908917
E9Q5G3	Kif23	0	0	0	0	0	0
E9Q5K9-2	Ythdc1	0	0	0	0	0	0
E9Q634	Myo1e	5727371	8132569	5666937	4.60435e+06	4.93993e+06	7353693
E9Q7G0	Numa1	2681248	3.68409e+06	3132770	2.36419e+06	3478881	3.01475e+06
E9Q8D0	Dnajc21	586258	0	413836	417263	569777	0
E9QAM5	Helz2	1.1168e+06	936628	861805	653957	0	1.2485e+06
E9QAT4-2	Sec16a	933928	1.86875e+06	641135	925853	1.78615e+06	1.93343e+06
G3X9C2	Nccrp1	0	0	0	0	0	0
G5E829	Atp2b1	3.30659e+06	2.94591e+06	2958370	2.66608e+06	1.07271e+06	2.76727e+06
G5E870	Trip12	2675064	2.19928e+06	2335734	2.45136e+06	2807734	2.38726e+06
O08528	Hk2	69175.6	0	0	0	0	0
O08529	Capn2	17700000	13800000	13900000	15500000	14900000	18700000
O08547	Sec22b	662362	193800	1.07161e+06	1.97412e+06	756710	2.80386e+06
O08553	Dpysl2	23100000	25700000	61200000	108000000	40700000	24400000
O08579	Emd	1.04465e+06	0	665574	0	649793	831832
O08582	Gtpbp1	886830	875023	1.40428e+06	850532	1.05341e+06	1.19249e+06
O08583	Alyref	661382	971724	0	3.20122e+06	0	0
O08586	Pten	369082	856902	1.30851e+06	880408	783934	1.25052e+06
O08599-2	Stxbp1	1.7044e+06	1.57538e+06	1.69187e+06	993510	1.82845e+06	1441061
O08664	Bcl7c	0	1.34565e+06	0	0	0	0
O08677-2	Kng1	0	0	666948	1.78198e+06	0	0
O08739	Ampd3	960748	1.13395e+06	1.15415e+06	0	1.93193e+06	1.08415e+06
O08749	Dld	2704245	2.0747e+06	3.68487e+06	5.29208e+06	3.12052e+06	4501659
O08759-2	Ube3a	1.28262e+06	1.69055e+06	1.6594e+06	1.3745e+06	0	0
O08784	Tcof1	167000000	76200000	207000000	119000000	184000000	104000000
O08807	Prdx4	1.72463e+06	2.3214e+06	1.15123e+06	2.20973e+06	2.14668e+06	3.15321e+06
O08808	Diaph1	4610045	4.08422e+06	4515442	4.50922e+06	4.14485e+06	4.50886e+06
O08810	Eftud2	6363186	2.23723e+06	21100000	9662454	11700000	3.51853e+06
O08848	RO60	0	0	2.82669e+06	7064506	1.25677e+06	1.92758e+06
O08917	Flot1	9578305	18300000	14400000	20000000	11100000	21600000
O08992	Sdcbp	2.39291e+06	3.06213e+06	1.75705e+06	1775818	1.98716e+06	3.10886e+06
O08997	Atox1	0	0	1.91589e+06	3.19284e+06	0	0
O09005	Degs1	890565	0	822764	854960	0	2.45619e+06
O09044	Snap23	0	0	495682	1.70674e+06	916958	606566
O09061	Psmb1	0	0	0	0	310342	801090
O09106	Hdac1	1.18722e+06	1.29397e+06	719792	0	1.16117e+06	885901
O09110	Map2k3	2083517	2141706	2.30056e+06	2.22745e+06	1648163	2846029
O09131	Gsto1	433083	0	879528	3613322	962645	1.43804e+06
O09164	Sod3	0	0	2.29252e+06	10800000	831304	0
O09167	Rpl21	117000000	102000000	122000000	85000000	84200000	70400000
O09172	Gclm	52400000	30500000	48200000	39700000	48300000	32700000
O35071	Kif1c	1.51341e+06	2.1479e+06	958166	1.46867e+06	1.93608e+06	1.89066e+06
O35129	Phb2	10400000	7.04628e+06	8374315	7.81873e+06	7.40055e+06	7092469
O35143	Atp5if1	2.30058e+06	3.96258e+06	2.61048e+06	2.89855e+06	3.06734e+06	2.5268e+06
O35215	Ddt	0	0	975342	3.45618e+06	1.04559e+06	0
O35218	Cpsf2	808015	1.1932e+06	460872	798804	1.2372e+06	1.18834e+06
O35226-2	Psmd4	5203699	4961305	4.65398e+06	5220118	4.82492e+06	5.13035e+06
O35286	Dhx15	8004264	6.35588e+06	7.3872e+06	5848691	6468238	7.24657e+06
O35295	Purb	1230414	0	1541862	3.38635e+06	1.0932e+06	1.33174e+06
O35326	Srsf5	3.75412e+06	3.21991e+06	5.21207e+06	3070389	3.70674e+06	2659672
O35343	Kpna4	5995344	2.65857e+06	7.04026e+06	3440413	3.4333e+06	4565026
O35344	Kpna3	5834244	1.96169e+06	6771374	4.13046e+06	6094222	4.93667e+06
O35345	Kpna6	1.63512e+06	1.06559e+06	0	1482020	271623	790940
O35350	Capn1	5.1558e+06	5.82855e+06	5165273	4992326	5.42176e+06	5.00977e+06
O35379	Abcc1	834610	0	0	432653	859564	990271
O35381	Anp32a	331441	720024	2.52829e+06	7.5084e+06	1.42078e+06	285463
O35382	Exoc4	1.41252e+06	1165434	1.11597e+06	1.22352e+06	916109	1.32672e+06
O35405	Pld3	0	0	0	0	0	0
O35490	Bhmt	0	0	0	15500000	0	3.13044e+06
O35495-2	Cdk14	1.04146e+06	314840	0	0	0	0
O35593	Psmd14	1.23937e+06	3.54685e+06	2.25541e+06	4.55135e+06	2.05888e+06	1.67406e+06
O35601	Fyb1	1.83406e+06	1.67414e+06	1.58696e+06	1.32963e+06	2.53834e+06	2262929
O35604	Npc1	957467	1.28264e+06	1.85691e+06	857835	990426	1.66974e+06
O35609	Scamp3	1.04532e+06	1.22195e+06	867447	1.02448e+06	511502	603391
O35639	Anxa3	323193	1.75067e+06	4.28431e+06	11300000	2.4809e+06	0
O35643	Ap1b1	0	0	1.33997e+06	2.70328e+06	1.43187e+06	0
O35657	Neu1	1.36949e+06	2.89131e+06	1.35669e+06	1.1009e+06	1.82027e+06	1.37427e+06
O35680	Mrps12	4699942	3.77886e+06	5.44004e+06	3.28633e+06	3.93198e+06	3745214
O35682	Myadm	0	0	0	0	0	0
O35683	Ndufa1	1669707	1.2872e+06	1375374	1.75546e+06	1.60055e+06	1.2185e+06
O35685	Nudc	0	0	0	1.11996e+06	0	0
O35691	Pnn	1753296	1.39131e+06	2.11791e+06	1.36564e+06	1483742	1.57259e+06
O35704	Sptlc1	1.56436e+06	1.36463e+06	1.98598e+06	1.21119e+06	1.22132e+06	1.28343e+06
O35730-2	Ring1	842332	0	1.58441e+06	0	0	0
O35744	Chil3	460902	466061	1.03297e+06	3.38713e+06	850286	864611
O35887	Calu	995817	1.35966e+06	2.26377e+06	3392221	1.54348e+06	2.10141e+06
O35892-2	Sp100	749787	1.51523e+06	949731	886494	972986	1.12908e+06
O35945	Aldh1a7	0	0	1.06523e+06	2663073	0	0
O35955	Psmb10	1.83905e+06	1.1027e+06	2262248	1.74349e+06	721746	1.01625e+06
O35972	Mrpl23	0	1.30465e+06	560606	0	0	0
O54724	Cavin1	826437	1.01219e+06	17200000	47800000	5202495	1944602
O54734	Ddost	3.11599e+06	2.56279e+06	4.4383e+06	5.86623e+06	3.54773e+06	4.29071e+06
O54774	Ap3d1	82000000	33800000	90700000	49100000	126000000	47900000
O54790	Mafg	0	1.97051e+06	0	0	627107	0
O54879	Hmgb3	0	0	0	0	0	0
O54916-3	Reps1	830430	496117	911629	872201	0	1.74026e+06
O54931-2	Akap2	0	0	1785690	4.55525e+06	0	0
O54941	Smarce1	1.17557e+06	1.17946e+06	1.0465e+06	1.01855e+06	955850	1200799
O54946-2	Dnajb6	819455	1.10555e+06	699186	947080	501330	0
O54950	Prkag1	0	0	0	0	0	0
O54962	Banf1	0	969251	1.80345e+06	3.0931e+06	1.44237e+06	956048
O54984	Get3	0	0	0	0	0	0
O54988-2	Slk	78500000	388726	10400000	12600000	43500000	17700000
O55013	Trappc3	0	0	0	0	0	0
O55022	Pgrmc1	0	0	1.99355e+06	3596725	832003	621824
O55023	Impa1	0	0	1.3579e+06	1.36372e+06	0	0
O55028	Bckdk	23500000	0	29200000	14400000	24800000	0
O55029	Copb2	481553	0	1.64837e+06	1.54015e+06	443689	2.55807e+06
O55098	Stk10	3.30111e+06	4636039	3.60033e+06	3004089	4945224	10300000
O55103	Prx	0	0	2.69645e+06	5.79244e+06	1.62723e+06	1.89281e+06
O55106	Strn	0	0	0	1.80904e+06	1.83593e+06	1.98567e+06
O55125	Nipsnap1	1.13593e+06	1.45883e+06	1.43832e+06	2.18574e+06	1.40372e+06	1.37279e+06
O55126	Nipsnap2	4.47561e+06	5.20063e+06	5565381	5.42039e+06	4.01692e+06	7.47568e+06
O55128	Sap18	1.49424e+06	2.34577e+06	1007583	813232	697100	1.14535e+06
O55131	Septin7	1.74945e+06	1.72686e+06	2.49318e+06	6.45094e+06	1.86189e+06	1.75264e+06
O55135	Eif6	0	0	0	0	0	0
O55142	Rpl35a	10700000	16800000	9622493	12400000	13200000	11900000
O55143-2	Atp2a2	3.05927e+06	3.09493e+06	4.17408e+06	3425337	3372285	4.94648e+06
O55201	Supt5h	2.04327e+06	2730814	1.68912e+06	1.96039e+06	1849023	4.36591e+06
O55222	Ilk	7377641	5658982	7.17639e+06	6272853	4740596	4.66601e+06
O55234	Psmb5	0	0	196126	1434156	0	0
O70145	Ncf2	1.80177e+06	2.44146e+06	2.37167e+06	1.82694e+06	2.75451e+06	2.4525e+06
O70152	Dpm1	1.47563e+06	1.28675e+06	1.44688e+06	2213483	2094593	1.25855e+06
O70172	Pip4k2a	13400000	26900000	10700000	14000000	14600000	38000000
O70194	Eif3d	13900000	13600000	14100000	9434146	15100000	11300000
O70251	Eef1b	1.13572e+06	2195563	2514384	2.86779e+06	2.47763e+06	2278805
O70310	Nmt1	1.6156e+06	0	2.35142e+06	0	2759315	0
O70333	Cript	3906668	5.98644e+06	3.74401e+06	2.56173e+06	5.90424e+06	2.85983e+06
O70378	Emc8	3.53056e+06	2824307	4.77286e+06	3.91267e+06	3.57927e+06	5.29937e+06
O70400	Pdlim1	0	0	1.09359e+06	2.43477e+06	0	0
O70404	Vamp8	0	0	0	0	0	0
O70435	Psma3	0	418067	863207	2.90033e+06	748879	576733
O70456	Sfn	0	0	0	0	0	0
O70475	Ugdh	1.1109e+06	1.52445e+06	1.06241e+06	1.39762e+06	1415834	1.72109e+06
O70493	Snx12	269843	0	678971	2.22176e+06	744726	978946
O70494-2	Sp3	0	0	0	0	0	0
O70496	Clcn7	3.11648e+06	3210656	3.46342e+06	2.45168e+06	3184780	2.88652e+06
O70503	Hsd17b12	5657907	5.80192e+06	5897136	6.12677e+06	5718152	7.81671e+06
O70551	Srpk1	1.35182e+06	1.62894e+06	1.01826e+06	1.13439e+06	1.72243e+06	1.40946e+06
O70566	Diaph2	2109839	690881	582652	454726	2.14133e+06	0
O88291	Znf326	379124	1.04376e+06	917244	0	0	0
O88342	Wdr1	4688596	3.76294e+06	5612091	6.91054e+06	4630184	3.77144e+06
O88351	Ikbkb	1.60748e+06	1.71627e+06	1.67386e+06	970338	1925358	1628285
O88379	Baz1a	325200	1.09418e+06	1.84172e+06	817650	0	527599
O88384	Vti1b	1.09902e+06	1.36268e+06	1.35772e+06	1684554	2.25647e+06	2.12148e+06
O88455	Dhcr7	0	0	0	0	0	0
O88487	Dync1i2	0	0	0	0	0	939508
O88508-2	Dnmt3a	0	0	0	0	0	0
O88512	Ap1g2	6148315	5.82336e+06	4891246	4345688	4693082	7354701
O88522	Ikbkg	729210	654498	639551	886712	426135	0
O88532	Zfr	0	0	0	0	0	0
O88569-2	Hnrnpa2b1	562067	1.35454e+06	0	651734	0	1.46209e+06
O88569	Hnrnpa2b1	32700000	56000000	31400000	44600000	43700000	64300000
O88574	Sap30	1.13186e+06	1.53379e+06	869198	1.94011e+06	1.22655e+06	1.39319e+06
O88653	Lamtor3	2.93982e+06	3.82766e+06	3.32799e+06	4.12715e+06	2388392	3.79025e+06
O88662	Emp2	127973	0	2487442	4.04412e+06	806458	0
O88668	Creg1	838696	0	531907	809226	820534	1.43238e+06
O88685	Psmc3	7637224	6.80263e+06	6333256	6.45473e+06	6501529	7.99332e+06
O88712-2	Ctbp1	260133	1.26426e+06	235778	738140	0	0
O88738-2	Birc6	971454	1.16809e+06	986909	906334	1.15356e+06	1.64345e+06
O88783	F5	558218	1.03656e+06	0	881859	0	1.4017e+06
O88839	Adam15	611895	832222	0	711700	690575	527711
O88842-2	Fgd3	809034	965090	748249	1083627	1.48507e+06	2300539
O88844	Idh1	21800000	19300000	19100000	23400000	17400000	22600000
O88939-2	Zbtb7a	2542669	4.94915e+06	1.71577e+06	1.78022e+06	2.79524e+06	5366774
O88967	Yme1l1	2.59604e+06	3.45217e+06	1.93112e+06	1.67421e+06	2.68522e+06	3.25772e+06
O88983	Stx8	0	742712	0	0	0	759348
O88986	Gcat	2.00307e+06	2.12448e+06	2.04052e+06	1.36484e+06	1.84613e+06	1.92696e+06
O89023	Tpp1	2.02116e+06	1.35384e+06	1.84709e+06	4235579	0	3.12924e+06
O89051	Itm2b	1.00571e+06	0	853986	678180	0	729411
O89053	Coro1a	30600000	26200000	28400000	32800000	39600000	47800000
O89079	Cope	5009563	3.50932e+06	3.64651e+06	3.88529e+06	4257026	4309993
O89109	Kcnn4	0	0	0	6184405	0	0
P00329	Adh1	0	238062	3.24491e+06	9464055	926303	0
P00405	Mtco2	1.62755e+06	1.534e+06	3232069	4.70442e+06	1.83409e+06	2.6598e+06
P00493	Hprt1	1.39835e+06	1.42416e+06	905210	2.30794e+06	3.18114e+06	2175514
P00920	Ca2	0	0	3.47036e+06	1.82982e+06	1677524	0
P01027	C3	4.0917e+06	5.53213e+06	3.18841e+06	6036556	4750728	5.53303e+06
P01029	C4b	1.84858e+06	1.72394e+06	1.88039e+06	2.0893e+06	3089686	4.167e+06
P01325	Ins1	14200000	19400000	11700000	11100000	23400000	12100000
P01837	Igkc	2.59466e+06	2173660	1.83465e+06	4.73897e+06	0	2.00887e+06
P01868	Ighg1	0	0	275990	1432467	442081	0
P01872-2	Ighm	22800000	0	0	0	963743	24400000
P01887	B2m	1.07857e+06	0	1.93448e+06	1.36611e+06	1.72056e+06	1.43878e+06
P01899	H2-D1	2624677	2.7546e+06	4.29984e+06	5.32202e+06	3.47572e+06	2969174
P01904	H2-Ea	0	0	0	0	0	0
P01915		0	0	0	0	0	0
P02088	Hbb-b1	0	0	0	0	0	0
P02104	Hbb-y	35200000	49100000	31000000	26400000	63100000	72800000
P02301	H3-5	1.46673e+06	16300000	3.06981e+06	2.65087e+06	2.24433e+06	4353568
P02463	Col4a1	0	0	577857	2876207	0	0
P02469	Lamb1	0	0	814227	2.10888e+06	926544	0
P02535-2	Krt10	0	0	0	0	0	0
P03930	Mtatp8	5.51666e+06	3884799	10600000	0	9351800	7913058
P03953-2	Cfd	0	0	699219	1.9098e+06	0	0
P04104	Krt1	0	0	0	7.10379e+06	0	0
P04117	Fabp4	0	0	0	602403	0	2.9576e+06
P04247	Mb	1.36371e+06	0	0	0	0	3.83257e+06
P04627	Araf	0	0	0	0	0	636498
P05017-2	Igf1	932366	874441	653820	465841	848955	548609
P05064	Aldoa	6926826	8945593	8.01014e+06	16300000	13000000	9619092
P05132	Prkaca	4452363	4.74323e+06	5171974	6.56836e+06	3.10237e+06	9253577
P05202	Got2	799188	0	2.94466e+06	5.95736e+06	1.41362e+06	1.36101e+06
P05784	Krt18	637775	0	1.68865e+06	4.87146e+06	736458	0
P06151	Ldha	167000000	147000000	164000000	151000000	166000000	194000000
P06684	C5	0	0	0	0	0	0
P06745	Gpi	78614.1	0	1.53082e+06	4526632	857929	390664
P06795	Abcb1b	737027	706944	614491	947386	0	666227
P06800-5	Ptprc	1.92434e+06	2.18056e+06	1.64911e+06	1.86594e+06	3.85683e+06	2373302
P06801	Me1	0	0	346590	177929	0	291260
P07091	S100a4	6028953	6444870	6.35203e+06	7871062	9214796	9661549
P07309	Ttr	2583407	1.33914e+06	3.56587e+06	6132613	9249967	8042189
P07356	Anxa2	4701778	4.00263e+06	9791625	15000000	8646275	5386651
P07724	Alb	15000000	8871169	213000000	448000000	28900000	39800000
P07744	Krt4	0	0	0	0	0	0
P07758	Serpina1a	472475	261323	5292171	12100000	0	1.04962e+06
P07901	Hsp90aa1	4.35588e+06	3.86622e+06	6541866	16100000	3.7776e+06	6.15537e+06
P08003	Pdia4	0	312093	1.40455e+06	2.2916e+06	971421	583138
P08046	Egr1	0	0	0	0	0	0
P08074	Cbr2	8798129	8045284	149000000	422000000	47800000	11600000
P08101-2	Fcgr2	705762	1.58168e+06	557944	802428	853369	1.80426e+06
P08103-2	Hck	7.8049e+06	8.286e+06	7029853	6.4523e+06	7115924	6695843
P08113	Hsp90b1	3803044	4.25165e+06	11000000	14500000	8514558	7.62247e+06
P08122	Col4a2	0	0	10400000	28900000	3.57081e+06	0
P08207	S100a10	2.43117e+06	3.47049e+06	4.68387e+06	6781860	5.01216e+06	3.59734e+06
P08226	Apoe	615999	1.1216e+06	2.54383e+06	3.45691e+06	1128756	477731
P08228	Sod1	1.25193e+06	1.29375e+06	19100000	54800000	8.07848e+06	2.41523e+06
P08249	Mdh2	734898	339162	7064189	13300000	2.43934e+06	2.81702e+06
P08551	Nefl	0	2.34391e+06	0	0	0	0
P08556	Nras	0	1.31932e+06	618411	476898	0	1.00588e+06
P08730	Krt13	0	0	1.45017e+06	0	0	0
P08752	Gnai2	51900000	49600000	50300000	42500000	39200000	55000000
P08775	Polr2a	1.20681e+06	2.77538e+06	5926615	5.34839e+06	3.91584e+06	3.17764e+06
P08905	Lyz2	2.01114e+06	2.68822e+06	4621602	3.93746e+06	2.36985e+06	1.62688e+06
P09041	Pgk2	0	0	0	0	339209	0
P09055	Itgb1	1.49542e+06	644264	5.50143e+06	11600000	3.00652e+06	1.71243e+06
P09103	P4hb	1.32098e+06	1.2143e+06	4.98981e+06	7.71343e+06	2730437	1.96645e+06
P09405	Ncl	2189591	2.70072e+06	3.08856e+06	6.74285e+06	3.81325e+06	3.44695e+06
P09411	Pgk1	2.43988e+06	3.22732e+06	5250643	7.26982e+06	3.5417e+06	3.34644e+06
P09450	Junb	2.85403e+06	2.57738e+06	2.33205e+06	2136336	2.15013e+06	2.10032e+06
P09470	Ace	1.48325e+06	0	1.09966e+06	4.5335e+06	427743	0
P09528	Fth1	785564	0	2128959	6700291	1767658	1.20161e+06
P09541	Myl4	0	0	0	392733	0	3.10379e+06
P09542	Myl3	7109519	7373203	16600000	6.83651e+06	16000000	10100000
P09581	Csf1r	1794057	2.30422e+06	2.66528e+06	1.42257e+06	2.58003e+06	1.73365e+06
P09602	Hmgn2	102202	0	736047	1.71551e+06	0	0
P09671	Sod2	0	0	1838670	6165406	1.07443e+06	1.285e+06
P09803	Cdh1	0	0	419398	1.24469e+06	0	0
P0C0S6	H2az1	454000000	476000000	807000000	1130000000	1230000000	668000000
P0C7T6	Atxn1l	2.05839e+06	2825609	1.30121e+06	2.18105e+06	2339789	3.35828e+06
P0DP26	Calm1	6.29636e+06	6.61829e+06	18200000	19700000	11800000	6040470
P10107	Anxa1	882047	1120607	3.2492e+06	4.72557e+06	2.27006e+06	1.80919e+06
P10126	Eef1a1	157000000	138000000	198000000	181000000	161000000	124000000
P10493	Nid1	0	327641	4.21398e+06	6762885	1.24587e+06	0
P10605	Ctsb	4603446	2.49327e+06	3.88762e+06	2.3999e+06	3.0263e+06	3.17155e+06
P10630-2	Eif4a2	738761	0	1.05763e+06	2.66009e+06	0	0
P10639	Txn	3140150	4.71876e+06	3.49634e+06	8433660	2717810	2.63803e+06
P10649	Gstm1	4741262	5.54786e+06	27100000	60000000	15900000	10100000
P10711	Tcea1	0	0	0	0	0	0
P10810	Cd14	0	466696	0	1.14467e+06	0	827130
P10833	Rras	3.06439e+06	2.83937e+06	6.44691e+06	9450602	4.83318e+06	5.14825e+06
P10852-2	Slc3a2	1.28525e+06	928970	2.8547e+06	2.25038e+06	2.31651e+06	3.27824e+06
P10853	H2bc15	0	2211431	587397	1.635e+06	685114	1.62828e+06
P10854	H2bc14	0	669353	0	0	0	0
P10922	H1-0	12800000	38100000	28200000	60800000	18500000	15000000
P11031	Sub1	28000000	15300000	39900000	27000000	30000000	20700000
P11087	Col1a1	12700000	1.96637e+06	20700000	54800000	10000000	16500000
P11152	Lpl	1.69643e+06	2.80077e+06	2404315	2.58434e+06	1.55647e+06	2.13069e+06
P11276	Fn1	9246259	6.15528e+06	7.59541e+06	19900000	4987693	6651146
P11352	Gpx1	939376	0	1.71497e+06	3.13145e+06	604039	0
P11404	Fabp3	0	0	236610	925254	0	620824
P11438	Lamp1	190064	0	3.01852e+06	626866	666882	0
P11440	Cdk1	5.18049e+06	4.88595e+06	4.36993e+06	4.40481e+06	5437566	5.10598e+06
P11499	Hsp90ab1	34100000	25400000	41500000	46100000	29100000	31900000
P11679	Krt8	1.10374e+06	2.48212e+06	2.31111e+06	10700000	1.1626e+06	1.04171e+06
P11725	Otc	0	0	0	0	0	0
P11928	Oas1a	0	0	0	0	0	0
P11983	Tcp1	26600000	30000000	28700000	31800000	33100000	41500000
P12382	Pfkl	14900000	11100000	12800000	10900000	13800000	16800000
P12710	Fabp1	0	0	2.02246e+06	0	726906	0
P12787	Cox5a	0	1755887	8393865	6.82405e+06	2.06252e+06	0
P12791-2	Cyp2b10	0	0	1963811	6030013	863224	0
P12815-2	Pdcd6	0	1544236	0	1.96296e+06	0	951801
P12970	Rpl7a	60700000	113000000	58800000	60400000	63700000	68400000
P13020-2	Gsn	2.55377e+06	3.13983e+06	7.50128e+06	16400000	4.16638e+06	3.55256e+06
P13542	Myh8	0	0	0	0	0	0
P13597-2	Icam1	0	0	2.06716e+06	5.18826e+06	744655	0
P13864	Dnmt1	1.79581e+06	1.87156e+06	2.06646e+06	1.35776e+06	1.57676e+06	1.37292e+06
P14069	S100a6	7.50972e+06	6970172	25500000	101000000	16400000	12000000
P14106	C1qb	294000000	384000000	262000000	303000000	235000000	377000000
P14115	Rpl27a	73900000	94200000	81100000	55700000	58500000	67600000
P14131	Rps16	116000000	107000000	119000000	81000000	99200000	96900000
P14148	Rpl7	34600000	60200000	35000000	36700000	33700000	43700000
P14152	Mdh1	341619	640770	2.72356e+06	10600000	1.2518e+06	1.79844e+06
P14206	Rpsa	11200000	8628105	15300000	15200000	21200000	11100000
P14211	Calr	1322641	667117	7904107	12600000	3.09527e+06	1.6521e+06
P14434	H2-Aa	0	0	984139	2.98724e+06	0	0
P14602	Hspb1	144188	213575	3233568	8138312	764992	965772
P14685	Psmd3	6.45703e+06	6528286	6.43823e+06	6811144	6.45013e+06	7794240
P14733	Lmnb1	2750777	4.59079e+06	6217194	8500903	4718280	3.53615e+06
P14824	Anxa6	878262	0	5.18755e+06	15700000	3.43019e+06	1.27187e+06
P14869	Rplp0	30300000	31600000	28000000	32300000	35500000	38100000
P15105	Glul	250719	0	549546	1.13935e+06	0	852551
P15306	Thbd	1.40887e+06	924030	1.82657e+06	1.53139e+06	2.15419e+06	2.87206e+06
P15307	Rel	16100000	0	0	0	13000000	12100000
P15331-2	Prph	0	943014	0	0	0	0
P15379-10	Cd44	788672	2.11016e+06	835290	1.50139e+06	0	0
P15532	Nme1	0	0	1.12947e+06	3182204	644660	0
P15626	Gstm2	0	0	1858687	3934059	833202	0
P15864	H1-2	114000000	1930000000	273000000	245000000	188000000	139000000
P16015	Ca3	192651	0	1.00466e+06	272468	744962	1.34296e+06
P16045	Lgals1	11800000	7.88553e+06	18300000	22500000	22000000	12200000
P16110	Lgals3	6.73501e+06	10400000	8111006	9323523	9420322	19000000
P16125	Ldhb	1.96589e+06	1.87341e+06	3.68773e+06	10700000	2.1037e+06	2.25454e+06
P16254	Srp14	43400000	29300000	41600000	31400000	57100000	38900000
P16330-2	Cnp	2125770	917341	1.1852e+06	1.22663e+06	1519987	950868
P16406	Enpep	0	0	4.1402e+06	11500000	0	0
P16460	Ass1	4585483	4.25963e+06	4661436	4.93437e+06	4.68482e+06	5.1123e+06
P16546	Sptan1	408615	902004	3.22388e+06	7951069	2.14719e+06	700877
P16675	Ctsa	5.86932e+06	11000000	5256546	4593977	4.36442e+06	4.80798e+06
P16858	Gapdh	96400000	76400000	88000000	93000000	91700000	103000000
P16879	Fes	1099059	822952	740102	1189011	1.79563e+06	977329
P17012	Zfx	1.59081e+06	1.34253e+06	1706124	0	1421323	1.40925e+06
P17047-2	Lamp2	0	0	3.01299e+06	2665867	1.75e+06	0
P17095	Hmga1	25600000	31400000	24500000	20500000	29700000	18900000
P17182	Eno1	21300000	16900000	21200000	30100000	29500000	23900000
P17225-2	Ptbp1	1.71076e+06	2.13739e+06	2.90118e+06	5.66457e+06	3267271	2.37396e+06
P17426-2	Ap2a1	17000000	13500000	14800000	11400000	11400000	13400000
P17427	Ap2a2	46300000	40200000	36400000	38900000	30400000	41600000
P17563	Selenbp1	2237922	3.67207e+06	17300000	35300000	7.41123e+06	5244668
P17710-2	Hk1	1.00288e+06	0	1.66544e+06	2608067	1.80435e+06	1.01009e+06
P17742	Ppia	399937	969842	2.76007e+06	10800000	0	450335
P17751-2	Tpi1	1816985	1968859	3026517	5.45134e+06	3.40476e+06	2855362
P17879	Hspa1b	2.16854e+06	1.89972e+06	2.74344e+06	4707700	2.86043e+06	2.80449e+06
P17918	Pcna	2737231	3.41636e+06	2618674	2410508	2.92979e+06	3781190
P18242	Ctsd	1.8407e+06	2.36796e+06	7164408	5.62946e+06	3.48918e+06	3.38145e+06
P18608	Hmgn1	88853.2	6.28864e+06	305156	890341	90965.6	0
P18653	Rps6ka1	0	0	683688	0	0	0
P18654	Rps6ka3	4.05381e+06	3.52566e+06	3.86938e+06	3.80278e+06	4.30012e+06	4628299
P18760	Cfl1	15900000	17300000	30000000	38600000	30800000	21800000
P19001	Krt19	934420	798018	5.75651e+06	7236074	2.88244e+06	1.84251e+06
P19096	Fasn	2.65672e+06	2.27644e+06	3.18351e+06	5344560	3619621	3345283
P19157	Gstp1	1.19821e+06	1.03007e+06	6.2191e+06	7.15297e+06	4039255	2.96687e+06
P19182	Ifrd1	0	0	0	0	909639	0
P19221	F2	2.70334e+06	4.51176e+06	1.4493e+06	1.54203e+06	4295095	5.32181e+06
P19253	Rpl13a	42000000	73400000	41500000	39800000	43500000	50500000
P19324	Serpinh1	704801	1.11814e+06	4.7599e+06	6.6176e+06	1.16611e+06	1.67816e+06
P19426-2	Nelfe	3.49421e+06	3.90234e+06	3427515	1.90755e+06	2.97965e+06	2213277
P19639	Gstm3	0	0	0	0	0	0
P19783	Cox4i1	0	0	1.05591e+06	3.32665e+06	0	1.12068e+06
P19973-2	Lsp1	0	0	232173	852351	0	0
P20029	Hspa5	26500000	25300000	27300000	28100000	32200000	33200000
P20065-2	Tmsb4x	1.29043e+06	0	12500000	46800000	3.41362e+06	921000
P20108	Prdx3	915364	834028	1.95788e+06	3.90862e+06	934332	1.53438e+06
P20152	Vim	3110000000	9830000000	1050000000	1100000000	335000000	839000000
P20491	Fcer1g	5.34636e+06	7.35968e+06	5529984	6022410	4164283	6648948
P20918	Plg	3.61824e+06	6086168	3291048	4090487	5.93048e+06	7.2705e+06
P21107-2	Tpm3	4.61746e+06	3.83271e+06	9949112	26900000	10300000	9742051
P21279	Gnaq	2.03931e+06	1.07155e+06	2852354	5259066	1.72106e+06	2.36173e+06
P21550	Eno3	500966	461531	0	0	0	214373
P21614	Gc	484596	0	1.20186e+06	3.52235e+06	728049	1.42478e+06
P21619	Lmnb2	199819	999772	1291587	3.1398e+06	1.0263e+06	0
P21841	Sftpc	0	0	0	0	0	0
P21981	Tgm2	7.01682e+06	9231456	13300000	12200000	12500000	12000000
P22366-2	Myd88	1.08309e+06	0	982821	847643	380227	794242
P22599	Serpina1b	0	0	844348	4.02393e+06	0	0
P22682	Cbl	0	0	0	0	0	0
P22892	Ap1g1	1.78364e+06	1.47335e+06	1.50692e+06	1816383	1.39817e+06	1.66419e+06
P22893	Zfp36	2.08822e+06	1.92379e+06	1.64339e+06	0	1.08778e+06	2.14398e+06
P23116	Eif3a	4718432	6.10463e+06	4.23672e+06	5.26712e+06	4801186	5.62773e+06
P23198	Cbx3	5490857	3799960	7387999	4553943	9433743	4340830
P23298	Prkch	1.00367e+06	971932	486120	643118	0	641745
P23492	Pnp	332027	420967	939894	3.3347e+06	1.06482e+06	722322
P23506-2	Pcmt1	5945982	2.26461e+06	4060961	4265846	5107066	7986808
P23780	Glb1	1.06284e+06	2.72109e+06	716697	0	0	387536
P23906	Irf2	588513	461664	677504	0	0	0
P23927	Cryab	0	0	0	1.62006e+06	0	419464
P23953	Ces1c	0	0	919875	2755454	0	0
P24270	Cat	608678	680403	1.86818e+06	3.28656e+06	1.36076e+06	1.00601e+06
P24369	Ppib	21900000	25100000	25500000	24300000	31700000	18900000
P24527	Lta4h	0	0	740236	2.74208e+06	0	0
P24547	Impdh2	337019	433930	0	1143296	520430	1058250
P24549	Aldh1a1	1.95085e+06	1.11844e+06	21800000	61000000	8112915	5.2183e+06
P24604-2	Tec	703392	884458	661610	492540	765036	818358
P24788	Cdk11b	16200000	14100000	16600000	10200000	12500000	6910840
P25206	Mcm3	3.4805e+06	3.55049e+06	3.8316e+06	2.67348e+06	4992212	3.32049e+06
P25444	Rps2	20300000	36900000	23000000	21800000	24600000	20300000
P25688	Uox	0	0	0	0	0	0
P25799-2	Nfkb1	0	0	0	3596725	0	0
P25911-2	Lyn	0	0	0	0	0	0
P25976-2	Ubtf	1.33854e+06	2.07773e+06	2.25556e+06	1.54189e+06	1.99158e+06	1245267
P26039	Tln1	7500198	7430557	16400000	29600000	13400000	8829931
P26040	Ezr	1.7494e+06	1.27016e+06	3.58087e+06	4538733	2.40637e+06	876002
P26041	Msn	11400000	7893568	22900000	17100000	17800000	9928875
P26043	Rdx	1.20686e+06	989238	2.00218e+06	4908047	1.6914e+06	1.69664e+06
P26151	Fcgr1	168000000	176000000	129000000	124000000	195000000	297000000
P26231	Ctnna1	413774	1.07972e+06	701559	2.54825e+06	1.22404e+06	1.15476e+06
P26350	Ptma	0	0	1.29661e+06	4285115	543228	52942.7
P26369	U2af2	2.28318e+06	1.86418e+06	2.15195e+06	1.55657e+06	2.06652e+06	1.58387e+06
P26443	Glud1	2.09781e+06	2.09043e+06	3980341	5307860	2173751	1.44742e+06
P26450	Pik3r1	1.16836e+06	1.26655e+06	831879	1.33633e+06	1.08163e+06	1.1173e+06
P26516	Psmd7	0	0	0	0	0	0
P26645	Marcks	0	0	2618383	5001974	915946	0
P26883	Fkbp1a	206059	490698	5549406	10100000	1.14521e+06	420382
P27048	Snrpb	1358962	1.77016e+06	2.06736e+06	3443710	2.42375e+06	3.27896e+06
P27546-2	Map4	1.48462e+06	2.24136e+06	2.03931e+06	4.35339e+06	2291562	2.55972e+06
P27601	Gna13	5.12644e+06	4197590	3.87246e+06	4.07965e+06	3227317	4605854
P27659	Rpl3	36000000	52000000	34100000	36300000	30700000	35000000
P27661	H2ax	4583243	5565663	10000000	9464524	4.77103e+06	3.41037e+06
P27773	Pdia3	1.44592e+06	1.50177e+06	6134098	12300000	3466970	2.19928e+06
P27870	Vav1	8245694	8.14845e+06	7.44131e+06	6.13089e+06	7428784	7489197
P28033-3	Cebpb	0	2.12867e+06	0	0	1.75303e+06	1.37507e+06
P28063	Psmb8	181854	0	357899	837117	333568	0
P28271	Aco1	2042152	1.89792e+06	1.73409e+06	2.01768e+06	1.91257e+06	2.08e+06
P28352	Apex1	0	0	0	0	236550	0
P28474	Adh5	0	0	1.28922e+06	3.09802e+06	414054	139685
P28574-2	Max	329066	1.86671e+06	0	0	0	328934
P28650	Adss1	97200000	109000000	67400000	73800000	83900000	179000000
P28652	Camk2b	0	0	0	0	0	739499
P28653	Bgn	357339	199682	2.20441e+06	8796609	1.27711e+06	1.12136e+06
P28654	Dcn	167558	0	596856	2.53757e+06	0	1.33174e+06
P28656	Nap1l1	2.51463e+06	4.96976e+06	2707298	3017318	3.52817e+06	2.72489e+06
P28661-2	Septin4	0	0	920456	2.09612e+06	0	0
P28665	Mug1	4613604	5.60935e+06	2.39587e+06	1.99276e+06	3.64817e+06	4.01928e+06
P28740-1	Kif2a	865416	1.14609e+06	735855	1.19261e+06	974973	686208
P28741	Kif3a	1.44556e+06	1452931	1.25509e+06	1.13323e+06	2.14095e+06	0
P28798	Grn	1.46056e+06	926656	818628	583135	886439	2.08709e+06
P28843	Dpp4	0	0	667828	2.7199e+06	583151	0
P28867-2	Prkcd	3.25765e+06	3.61434e+06	4.75847e+06	3.26651e+06	3.83213e+06	3.29625e+06
P29341	Pabpc1	4.32342e+06	4725384	3.65593e+06	5993292	6.55061e+06	6.22025e+06
P29351-2	Ptpn6	9842208	8895385	10400000	9994516	17700000	8920650
P29391	Ftl1	3.64215e+06	3.73409e+06	8.1986e+06	14900000	8804601	7.561e+06
P29416	Hexa	762741	1078969	1.26197e+06	0	1.40059e+06	988128
P29452	Casp1	1.04314e+06	1.43338e+06	940457	1.25236e+06	1.24659e+06	1.30072e+06
P29699	Ahsg	0	0	1.73809e+06	9143198	0	0
P29758	Oat	0	0	2.50227e+06	6.57524e+06	832243	1.00118e+06
P29788	Vtn	374150	0	0	0	0	0
P30115	Gsta3	498886	0	6193826	7.21436e+06	2.15627e+06	0
P30275	Ckmt1	0	0	0	0	0	0
P30355	Alox5ap	2861887	6228842	3.06516e+06	4.2732e+06	3.64338e+06	4.03277e+06
P30415	Nktr	1.76526e+06	1.51697e+06	1.65001e+06	1114212	1295116	0
P30681	Hmgb2	991531	1.42671e+06	3.39685e+06	7.02715e+06	2.05893e+06	518572
P30993	C5ar1	3.59767e+06	4.83021e+06	3.17765e+06	2.56971e+06	2.92114e+06	3455012
P30999	Ctnnd1	3.32323e+06	5.163e+06	3.21821e+06	4.39117e+06	3.91745e+06	5.17661e+06
P31001	Des	1415104	2.01194e+06	2.21062e+06	7032859	3.07617e+06	4.97144e+06
P31230	Aimp1	9645147	9976087	9684828	9318189	8043966	6.6917e+06
P31428	Dpep1	0	0	2.05126e+06	5.38504e+06	869460	0
P31725	S100a9	0	1.4945e+06	2.21257e+06	6.48761e+06	0	0
P31786	Dbi	0	0	723351	0	0	0
P31938	Map2k1	5.36525e+06	4332241	5.09917e+06	4020466	4736579	5341335
P31996-2	Cd68	3.91883e+06	4.30769e+06	3438989	3.42401e+06	4923224	3.0883e+06
P32020	Scp2	0	1.74376e+06	624030	1.98315e+06	0	0
P32067	Ssb	2.97423e+06	2.64952e+06	3.05675e+06	2.25849e+06	3979868	2.72866e+06
P32233	Drg1	1.25342e+06	0	1.15157e+06	1.81456e+06	1.10064e+06	1.34992e+06
P32261	Serpinc1	883709	1.12923e+06	1.34954e+06	3093620	1.52809e+06	1.72254e+06
P32883-2	Kras	4.46742e+06	4.86252e+06	5.24754e+06	5.14957e+06	6.87899e+06	4311112
P32921-2	Wars1	278746	667485	1.34591e+06	3.74345e+06	383705	517762
P33267	Cyp2f2	0	0	2.37545e+06	6269474	1.20778e+06	1.22076e+06
P33609	Pola1	0	0	0	0	0	0
P34022	Ranbp1	1072711	1382337	1.7834e+06	3.40807e+06	3.05937e+06	2.09675e+06
P34884	Mif	9069406	5.68887e+06	8202114	9094416	6.65983e+06	6.91948e+06
P35123	Usp4	815574	557038	628983	1.01243e+06	1324792	834918
P35242	Sftpa1	369354	439438	13400000	37200000	3.73968e+06	0
P35278	Rab5c	2.66762e+06	1.27591e+06	4.4144e+06	10100000	2.386e+06	2382186
P35279-2	Rab6a	496485	0	3622124	4.68543e+06	0	0
P35282	Rab21	1.56856e+06	2.60675e+06	1.54018e+06	1.76338e+06	1.01837e+06	2.32624e+06
P35293	Rab18	836292	934753	1.47506e+06	3.01162e+06	1.38109e+06	1.65957e+06
P35441	Thbs1	1.40514e+06	1.20799e+06	0	5486323	1.734e+06	2.32916e+06
P35486	Pdha1	862584	857437	1051453	2.59334e+06	0	1.60507e+06
P35550	Fbl	6832619	7881801	5709187	8698741	7548070	16100000
P35564	Canx	941775	976310	3.38493e+06	4.58491e+06	2.00966e+06	1.26417e+06
P35585	Ap1m1	3.69624e+06	3540819	3.33238e+06	2.348e+06	3445874	3.41831e+06
P35601-2	Rfc1	1.46508e+06	1.8924e+06	1.68609e+06	1.2521e+06	3.64422e+06	1.75525e+06
P35700	Prdx1	58700000	77100000	66800000	82200000	112000000	75700000
P35821	Ptpn1	0	0	476418	0	818973	0
P35831	Ptpn12	1.38969e+06	1.36982e+06	1.83937e+06	1.64867e+06	2407505	1.75325e+06
P35922-2	Fmr1	1.0408e+06	1.48837e+06	676038	1.07657e+06	1.14501e+06	1.47234e+06
P35979	Rpl12	23100000	29800000	25800000	31900000	35600000	27600000
P35980	Rpl18	72400000	89200000	69200000	61200000	56100000	66000000
P35991	Btk	3.09201e+06	2542036	3123971	2.47597e+06	3.75622e+06	4.3926e+06
P36371	Tap2	2.15118e+06	2.51658e+06	2.0749e+06	0	0	1.42917e+06
P36423	Tbxas1	1.34984e+06	1.27206e+06	977910	862526	1.02906e+06	1.21187e+06
P36536	Sar1a	1226619	1.10075e+06	2.23644e+06	5.86848e+06	1.58693e+06	1.09443e+06
P36916	Gnl1	1.75599e+06	1.71979e+06	1.79815e+06	1.25238e+06	1.94095e+06	1.26116e+06
P37040	Por	2.07589e+06	1.52816e+06	2.96993e+06	4.24821e+06	1857177	1.32256e+06
P37804	Tagln	0	168980	669627	2.78831e+06	0	1.24013e+06
P37913	Lig1	1.13365e+06	1.59853e+06	1.04067e+06	918761	1.36211e+06	1.0662e+06
P38647	Hspa9	29500000	28500000	26800000	25000000	25000000	38300000
P39054	Dnm2	23100000	23100000	19400000	21500000	19900000	26100000
P39447	Tjp1	0	0	1.01502e+06	2479364	164222	0
P39688-2	Fyn	0	0	0	0	0	0
P39749	Fen1	2.15205e+06	2240957	2.0506e+06	1.78518e+06	2822888	1.6105e+06
P40124	Cap1	2.00196e+06	1.37699e+06	5119188	10200000	3844566	2.62819e+06
P40142	Tkt	4.14673e+06	3.32875e+06	8686874	23500000	6.72643e+06	6285613
P40336-2	Vps26a	1.29844e+06	782244	930027	1.35256e+06	1.4549e+06	1.14819e+06
P40630-2	Tfam	730692	4.39388e+06	945332	1.13618e+06	798341	1.24965e+06
P40936	Inmt	870766	0	21900000	12400000	7.70508e+06	1.3826e+06
P41105	Rpl28	62000000	71500000	61300000	48300000	50100000	48200000
P41209	Cetn1	0	781588	0	0	0	0
P41216	Acsl1	0	0	0	0	0	0
P41241	Csk	3.70058e+06	3113530	3.69489e+06	3.43053e+06	3.2388e+06	4.01527e+06
P42125	Eci1	1.14274e+06	1.22917e+06	3.27167e+06	6.66652e+06	1879140	1.63493e+06
P42208	Septin2	1.77058e+06	1.80314e+06	2802914	4463584	2.6286e+06	2.54803e+06
P42225	Stat1	4772951	4.15867e+06	4.08731e+06	2754370	3441503	4.18965e+06
P42669	Pura	615220	0	2.51915e+06	5431680	1.66345e+06	1.0465e+06
P42932	Cct8	2.54558e+06	2.28434e+06	2960668	7.02222e+06	3.43227e+06	3572125
P43024	Cox6a1	9612521	4.18875e+06	3.52432e+06	3.09494e+06	0	2.95467e+06
P43274	H1-4	31700000	482000000	70700000	91100000	60400000	39100000
P43275	H1-1	12300000	352000000	23300000	14600000	14300000	11500000
P43276	H1-5	68100000	1170000000	127000000	103000000	91700000	81500000
P43277	H1-3	15800000	187000000	33200000	27500000	25900000	17800000
P45376	Akr1b1	703002	741311	2.51245e+06	6688235	1.42804e+06	1.06754e+06
P45591	Cfl2	0	0	749118	1.57555e+06	0	0
P45878	Fkbp2	0	815692	927318	0	0	0
P45952	Acadm	1.29365e+06	1.18522e+06	1.29042e+06	1.18408e+06	1085229	1.33935e+06
P46412	Gpx3	0	1.13704e+06	653665	3.70588e+06	0	0
P46460	Nsf	5.27619e+06	5075948	4.83026e+06	4898644	4985706	5.57452e+06
P46467	Vps4b	2.52654e+06	3.40477e+06	2.22063e+06	3.28342e+06	4344692	3.18963e+06
P46471	Psmc2	4514442	4.75299e+06	4229548	3.94876e+06	4510202	5299580
P46638	Rab11b	11100000	11900000	13100000	17000000	11800000	14000000
P46664	Adss2	1146097	1258482	859054	1.01901e+06	1.72523e+06	1175213
P46735-2	Myo1b	0	0	1.17883e+06	4.18868e+06	807539	0
P46737	Brcc3	1058296	610050	1.16593e+06	1.58758e+06	1.92626e+06	2.29444e+06
P46978	Stt3a	2.64096e+06	2.49768e+06	2.34077e+06	2666941	2.32331e+06	2.19795e+06
P47738	Aldh2	24900000	26200000	40300000	45600000	26800000	31000000
P47740	Aldh3a2	0	431204	527172	1.76164e+06	893482	0
P47753	Capza1	15500000	15700000	14800000	18600000	15700000	24800000
P47754	Capza2	60500000	69300000	57100000	71200000	52200000	74800000
P47757-2	Capzb	16000000	14700000	16700000	19500000	21500000	18400000
P47791-2	Gsr	0	0	1.01947e+06	2.39908e+06	0	0
P47856-2	Gfpt1	713995	637506	513549	808877	1.17329e+06	827953
P47857-2	Pfkm	829798	736890	761778	568296	1.08507e+06	1.13133e+06
P47911	Rpl6	35700000	57400000	30800000	30600000	34200000	39000000
P47915	Rpl29	102000000	99900000	122000000	81100000	74600000	63100000
P47962	Rpl5	3.00364e+06	4690539	2818420	2.46056e+06	3.02213e+06	2.70752e+06
P47963	Rpl13	175000000	173000000	187000000	118000000	135000000	127000000
P48025	Syk	11000000	9265867	8932962	9640642	9216732	10800000
P48036	Anxa5	2.04574e+06	1.36144e+06	21100000	53800000	6661759	1.94316e+06
P48193-2	Epb41	1707914	1.39568e+06	2801862	2.80335e+06	2291588	2.68517e+06
P48410	Abcd1	2.00379e+06	1.81478e+06	2.23113e+06	1.66747e+06	2166749	1.93062e+06
P48441	Idua	1.87994e+06	2.64795e+06	2.21433e+06	1.44685e+06	1.93797e+06	2.53344e+06
P48453-2	Ppp3cb	1.12514e+06	1329871	1.0361e+06	1.75978e+06	1.38892e+06	1.34006e+06
P48678	Lmna	10200000	15500000	18200000	30600000	13100000	12400000
P48725-2	Pcnt	0	217711	0	0	0	0
P48758	Cbr1	0	448993	1.07719e+06	2.53999e+06	853783	0
P48962	Slc25a4	7783551	6499086	8.19132e+06	6118664	5617556	7039195
P49138	Mapkapk2	1.0166e+06	1.31293e+06	1393609	1.3435e+06	1.53922e+06	1.2336e+06
P49182	Serpind1	337632	711106	374195	0	0	0
P49183	Dnase1	0	0	1.65236e+06	4500900	0	0
P49312	Hnrnpa1	1.84041e+06	3.84133e+06	3.72513e+06	9015440	3.85993e+06	3.43263e+06
P49429	Hpd	0	0	0	0	0	0
P49446-2	Ptpre	1346567	754972	858224	1.6912e+06	1.97219e+06	1724050
P49710	Hcls1	0	355065	147325	0	0	524183
P49717	Mcm4	2088181	2.17832e+06	1.76149e+06	1.44998e+06	2.31048e+06	1.80718e+06
P49718	Mcm5	4326783	5488376	3.37665e+06	4042268	4.1726e+06	5.2433e+06
P49722	Psma2	0	0	0	0	0	0
P49813	Tmod1	0	0	935286	1.55678e+06	0	0
P49817	Cav1	747975	2.34053e+06	18800000	39300000	4.42109e+06	1.59652e+06
P49935	Ctsh	371821	0	387710	2.26898e+06	0	0
P49962	Srp9	4838999	0	2.76621e+06	1104115	0	0
P50114	S100b	0	0	0	0	0	0
P50172	Hsd11b1	0	0	1.29887e+06	3.93249e+06	581374	0
P50247	Ahcy	1.6039e+06	3.38209e+06	3.03886e+06	5527394	2.94431e+06	2.89959e+06
P50285	Fmo1	0	0	1.9557e+06	5.06505e+06	843991	0
P50295	Nat2	713130	1.08842e+06	548658	871951	968238	838194
P50404	Sftpd	0	0	0	0	0	0
P50405	Sftpb	91011.9	0	1.96709e+06	7.61065e+06	737500	0
P50446	Krt6a	1.81599e+06	1.73333e+06	8189890	31900000	3269632	2.96012e+06
P50516	Atp6v1a	2643697	2796947	3.69386e+06	4164651	3.89365e+06	4113772
P50518	Atp6v1e1	1.72099e+06	2.5261e+06	2.45329e+06	3368171	4.12474e+06	2.38782e+06
P50543	S100a11	615053	1.40822e+06	2095033	12700000	1.54805e+06	1.16909e+06
P50544	Acadvl	556633	943444	1.16137e+06	1.98891e+06	1.0767e+06	1.56542e+06
P50580	Pa2g4	45100000	1.80278e+06	1.21465e+06	1.92e+06	1605885	0
P51125-2	Cast	0	0	0	0	0	0
P51150	Rab7a	1.59574e+06	2.01451e+06	5679357	7373217	3.37394e+06	3.48015e+06
P51410	Rpl9	22800000	24700000	28700000	19400000	26100000	20200000
P51660	Hsd17b4	0	1076508	2.12357e+06	2.11287e+06	0	227661
P51670	Ccl9	1409135	1.2566e+06	1.56673e+06	846235	1.36966e+06	781625
P51829	Adcy7	0	0	0	0	0	0
P51855	Gss	0	0	300159	930620	0	0
P51859	Hdgf	0	0	657929	1.39178e+06	603279	0
P51863	Atp6v0d1	3.98715e+06	5035472	3.53468e+06	3424558	4.04119e+06	3687698
P51880	Fabp7	0	0	0	0	0	0
P51881	Slc25a5	86400000	79600000	89800000	89100000	66500000	80700000
P51885	Lum	2.75507e+06	4634848	3117996	4.47546e+06	5861543	2.16213e+06
P51908	Apobec1	2.90917e+06	8243404	3730923	2.9666e+06	3338574	4581535
P52196	Tst	0	0	0	0	0	0
P52332	Jak1	1.50477e+06	2.25003e+06	1.87619e+06	1.49206e+06	1.83895e+06	1.86799e+06
P52430	Pon1	4.78779e+06	0	4.36472e+06	5.15428e+06	7248810	7.58937e+06
P52480-2	Pkm	3.00676e+06	2.69396e+06	3.61391e+06	3506804	4.35536e+06	3616073
P52480	Pkm	28100000	20700000	35700000	40800000	41700000	27200000
P52623	Uck1	1.28967e+06	911220	1.04982e+06	1.08465e+06	846672	1269318
P52760	Rida	0	0	0	0	0	0
P52927	Hmga2	5721089	5697566	4911055	3625703	6302829	3.11464e+06
P53395	Dbt	10400000	15000000	9884109	12200000	13800000	19300000
P53810	Pitpna	1.23802e+06	596043	1.39939e+06	0	541980	708660
P53994	Rab2a	0	0	1.04838e+06	2.12441e+06	0	0
P54071	Idh2	2.07077e+06	2.97536e+06	6.37439e+06	12200000	2395062	3.34585e+06
P54116	Stom	20800000	24000000	20900000	22600000	14800000	23700000
P54227	Stmn1	430434	194509	924451	3258265	342787	329978
P54254	Atxn1	462879	679707	0	433843	0	992368
P54276	Msh6	1463676	912389	1.85833e+06	1.18137e+06	1.87855e+06	1.38952e+06
P54728	Rad23b	0	0	0	0	0	0
P54729	Nub1	5299073	5161180	5911436	4.08941e+06	4.17058e+06	6.27386e+06
P54775	Psmc4	5.82318e+06	6308908	6.38494e+06	6.4453e+06	6031793	7.93075e+06
P54818	Galc	2.1294e+06	1.36526e+06	2.8756e+06	709525	1.9887e+06	0
P54822	Adsl	1.33841e+06	1.04227e+06	1.62294e+06	1952997	2184872	1027335
P54823	Ddx6	0	0	537209	1.02276e+06	0	0
P54869	Hmgcs2	0	0	704348	0	0	0
P54987	Acod1	1.46622e+06	622562	1.08141e+06	829388	1.0146e+06	1.6163e+06
P55096	Abcd3	1.29608e+06	883816	999911	2.29227e+06	1.28154e+06	2.21761e+06
P55258	Rab8a	5044600	4182600	3714891	5723892	4277956	4.51529e+06
P55264	Adk	541674	768400	1.78115e+06	2257974	833590	1.1133e+06
P55284	Cdh5	0	0	1091039	3.77874e+06	435205	0
P55302	Lrpap1	1.13828e+06	1.26998e+06	1.64513e+06	1607303	1.6972e+06	1.66469e+06
P55937-1	Golga3	0	0	0	0	0	0
P56135	Atp5mf	14900000	14400000	14200000	11300000	16200000	15600000
P56379	Atp5mpl	1257134	860945	832275	645874	499216	985396
P56383	Atp5mc2	8846096	5.97036e+06	16600000	11000000	5.06568e+06	7.8561e+06
P56395	Cyb5a	451401	0	3.20332e+06	8410130	1.06483e+06	1.22884e+06
P56399	Usp5	860750	0	1.06936e+06	2591561	470315	987446
P56480	Atp5f1b	11800000	10700000	15800000	27600000	12800000	18100000
P56857-3	Cldn18	0	0	1.56364e+06	5925237	554988	0
P56959	Fus	0	0	0	0	0	0
P56960	Exosc10	792952	605625	694066	790443	702224	557973
P57746	Atp6v1d	7101568	7.6655e+06	6148111	5000053	5506854	5404528
P57759	Erp29	0	244515	1.10381e+06	1.67232e+06	1.14792e+06	711395
P57776	Eef1d	2.42948e+06	4.03215e+06	4.26757e+06	4.65332e+06	5999051	5.28091e+06
P57780	Actn4	835993	865601	3.03995e+06	9557577	1.7706e+06	1.63413e+06
P57784	Snrpa1	1.27459e+06	2.2432e+06	1.34173e+06	1.32902e+06	2.01429e+06	1231760
P57787	Slc16a3	3.85655e+06	3.19257e+06	0	2007655	1.59389e+06	2.23169e+06
P58059	Mrps21	6044185	4149097	5.40123e+06	2.83972e+06	3.98634e+06	3857351
P58064	Mrps6	377254	533998	187266	0	493311	491961
P58252	Eef2	8858855	9577908	13500000	20600000	16800000	10800000
P58281-2	Opa1	1.68202e+06	1708662	1217885	1.72454e+06	1.46719e+06	2.07102e+06
P58389	Ptpa	69346.2	0	0	1.40194e+06	0	0
P58404-2	Strn4	0	38400000	51200000	66800000	1.80157e+06	121000000
P58468	Slx9	5556881	5.06376e+06	3.43145e+06	2.52732e+06	5.33587e+06	2.7807e+06
P58681	Tlr7	2.53631e+06	2.78918e+06	2.09477e+06	1.62432e+06	1.56401e+06	1823073
P58774-2	Tpm2	1.02612e+06	0	805593	2.38888e+06	848950	2975985
P59016	Vps33b	1.34477e+06	2.07543e+06	1.01649e+06	1.23432e+06	1.3611e+06	2.02813e+06
P59325	Eif5	728834	341568	1.25056e+06	974452	1.62194e+06	531776
P59672-2	Anks1a	0	0	1.3293e+06	1.14015e+06	1.58713e+06	1.35641e+06
P59708	Sf3b6	1.08248e+06	863887	997615	1.3183e+06	1.10484e+06	1.16541e+06
P59999	Arpc4	6429881	5937606	8464372	15300000	5319738	5.21024e+06
P60122	Ruvbl1	643744	356811	1.75976e+06	2.02674e+06	1.23753e+06	877876
P60229	Eif3e	877852	1.03144e+06	3047976	1.0995e+06	1.42742e+06	991363
P60335	Pcbp1	12300000	11500000	14200000	13300000	10900000	11400000
P60605	Ube2g2	3.52136e+06	3.25091e+06	2416073	2.27715e+06	2.87295e+06	3364980
P60710	Actb	353000000	306000000	368000000	458000000	414000000	313000000
P60766	Cdc42	6870850	6601686	6.92839e+06	7468025	7.82815e+06	11200000
P60843	Eif4a1	43400000	43800000	44400000	41900000	36000000	42500000
P60867	Rps20	43400000	77100000	46500000	44100000	38100000	47300000
P61027	Rab10	1.74554e+06	830228	1.7276e+06	2.5332e+06	1199851	1198838
P61028	Rab8b	2.30179e+06	3.09413e+06	2.55787e+06	3.03666e+06	2.07039e+06	2.96228e+06
P61089	Ube2n	562178	144636	2.94949e+06	7160288	1.85383e+06	1.22866e+06
P61161	Actr2	4.37798e+06	3.16969e+06	4.59955e+06	5.60339e+06	3612801	4713746
P61164	Actr1a	6985756	7393675	8503276	8115188	7.00033e+06	9137549
P61166	Tmem258	0	0	0	0	0	0
P61205	Arf3	5.99517e+06	3660263	6596143	7.32532e+06	4807240	5242624
P61211	Arl1	527981	336223	1.09387e+06	1.89285e+06	0	2.81321e+06
P61222	Abce1	5.57998e+06	5.69564e+06	4989137	4.50577e+06	3.94862e+06	5.58167e+06
P61255	Rpl26	28000000	28100000	35600000	27700000	31200000	23000000
P61327	Magoh	0	0	0	0	0	340246
P61358	Rpl27	24600000	32500000	25700000	25600000	21800000	17600000
P61458	Pcbd1	0	0	0	0	0	0
P61514	Rpl37a	115000000	95800000	94400000	93600000	88700000	57800000
P61620	Sec61a1	728006	595370	1.39617e+06	5211568	501553	1.0976e+06
P61750	Arf4	4.75503e+06	4.16119e+06	4.64668e+06	9057279	4.49582e+06	6.1729e+06
P61924	Copz1	4333105	4646876	3.39956e+06	3367613	3.72177e+06	4.49667e+06
P61957	Sumo2	311060	0	2.2244e+06	3.86601e+06	0	0
P61961	Ufm1	399313	849907	1259011	1.36999e+06	1.89849e+06	1.50038e+06
P61963	Dcaf7	1.83225e+06	1.98491e+06	1.44452e+06	1.23273e+06	1.10655e+06	731300
P61965	Wdr5	880650	1.35541e+06	1.30941e+06	1.07471e+06	1.71111e+06	1.57656e+06
P61971	Nutf2	0	0	807326	2.83084e+06	836446	946006
P61979-2	Hnrnpk	5.55449e+06	6138941	8985052	15000000	10400000	8506802
P61982	Ywhag	11000000	13700000	15600000	17600000	12600000	14500000
P62046	Lrch1	0	0	0	1.73234e+06	0	0
P62082	Rps7	62000000	51500000	64600000	56100000	62800000	44200000
P62137	Ppp1ca	3.90417e+06	5944389	3345932	5708619	4.7962e+06	4.71055e+06
P62192	Psmc1	8442700	7.96755e+06	8112293	9266759	8653532	11700000
P62196	Psmc5	31500000	28500000	23900000	34200000	26100000	48900000
P62242	Rps8	74100000	79600000	80600000	58900000	74300000	67000000
P62245	Rps15a	15900000	21600000	16000000	14400000	15000000	15500000
P62259	Ywhae	1.96819e+06	3385381	7.54671e+06	6833032	3.14939e+06	2.32581e+06
P62264	Rps14	68200000	60400000	65200000	55400000	75200000	50800000
P62267	Rps23	265000000	159000000	306000000	169000000	131000000	136000000
P62270	Rps18	122000000	116000000	133000000	66100000	106000000	72600000
P62274	Rps29	214000000	214000000	296000000	181000000	150000000	108000000
P62281	Rps11	103000000	114000000	112000000	93200000	109000000	95300000
P62301	Rps13	28600000	49200000	28500000	21900000	27600000	23900000
P62305	Snrpe	1.30102e+06	1.45159e+06	1.01931e+06	1.0899e+06	847846	1480796
P62307	Snrpf	1.57964e+06	864676	1.0434e+06	725167	819477	2.02562e+06
P62309	Snrpg	865329	942301	1.61136e+06	4018993	1.80817e+06	1.5602e+06
P62311	Lsm3	0	0	452475	1.4171e+06	0	0
P62315	Snrpd1	2413226	1.60283e+06	2.03892e+06	2.74215e+06	1315152	1347953
P62317	Snrpd2	15700000	2.52247e+06	11000000	15300000	15800000	12200000
P62320	Snrpd3	1.41367e+06	2.43292e+06	2.54231e+06	2.30704e+06	2.6506e+06	1.9595e+06
P62331	Arf6	5269578	4790021	7.17035e+06	6.24068e+06	8.16667e+06	6424506
P62334	Psmc6	3671007	3.56387e+06	3.33658e+06	3.44857e+06	2.48739e+06	2.99791e+06
P62627	Dynlrb1	3.66626e+06	1695881	3917812	5.2354e+06	4382862	4.69625e+06
P62631	Eef1a2	0	3.47355e+06	0	0	0	0
P62702	Rps4x	83900000	86600000	100000000	75300000	92200000	59600000
P62715	Ppp2cb	1.06524e+06	1.15873e+06	2.09777e+06	998919	1.04272e+06	1.24124e+06
P62717	Rpl18a	16700000	41000000	11700000	12700000	10900000	15800000
P62743	Ap2s1	1.21743e+06	860592	667581	661200	0	1.25936e+06
P62748	Hpcal1	0	0	0	2233006	805262	0
P62751	Rpl23a	76300000	76300000	79800000	64300000	92800000	71500000
P62754	Rps6	79500000	86200000	97900000	72300000	69200000	62200000
P62774	Mtpn	0	0	401486	2.41495e+06	0	0
P62806	H4c16	78600000	91300000	167000000	140000000	167000000	97200000
P62814	Atp6v1b2	12100000	11500000	12800000	11700000	17100000	13400000
P62827	Ran	71300000	86700000	65700000	78100000	67100000	86300000
P62830	Rpl23	125000000	77700000	102000000	69800000	78000000	50900000
P62843	Rps15	23800000	22500000	24000000	14400000	22100000	16200000
P62849	Rps24	64400000	47700000	62100000	52200000	58200000	44500000
P62852	Rps25	605000000	406000000	694000000	413000000	705000000	403000000
P62855	Rps26	54400000	52900000	67700000	40300000	54200000	40200000
P62858	Rps28	2.18585e+06	1.98759e+06	2388591	4.30249e+06	3.83854e+06	2.87139e+06
P62862	Fau	558000000	448000000	565000000	534000000	574000000	405000000
P62869	Elob	3.54795e+06	3.56076e+06	3994358	4.70696e+06	7627280	3.45204e+06
P62876	Polr2l	558212	875079	705629	0	821743	965457
P62880	Gnb2	2.24803e+06	1.99782e+06	5778248	14300000	4.35211e+06	2.25236e+06
P62889	Rpl30	6258725	5.11541e+06	5.92112e+06	5.95211e+06	6.62736e+06	5094061
P62892	Rpl39	88000000	81500000	120000000	63400000	36400000	43600000
P62900	Rpl31	50200000	53100000	59500000	48300000	44500000	41500000
P62908	Rps3	57200000	53600000	55700000	51600000	60000000	52200000
P62911	Rpl32	81300000	73000000	92000000	58100000	55200000	61900000
P62918	Rpl8	88700000	100000000	99400000	75900000	60800000	64600000
P62960	Ybx1	2.26637e+06	4010932	2.47613e+06	2.93743e+06	3534497	4022811
P62962	Pfn1	1.85831e+06	1.82021e+06	9933467	10900000	3.88508e+06	3673682
P62984	Uba52	0	0	0	0	0	0
P62996	Tra2b	1.44889e+06	3286709	2.52281e+06	2571884	3211561	3.5125e+06
P63001	Rac1	1955879	2.30844e+06	1.62173e+06	1811112	3.06169e+06	2209909
P63005	Pafah1b1	0	1.01379e+06	3.63506e+06	5.58887e+06	5.43424e+06	749691
P63017	Hspa8	58000000	62200000	63800000	64000000	63600000	61600000
P63028	Tpt1	1.40335e+06	1289326	3004876	3.23727e+06	3.0964e+06	1.51762e+06
P63037	Dnaja1	3108451	1.98741e+06	2.42101e+06	2.62961e+06	4214457	2.32465e+06
P63038	Hspd1	3.63869e+06	3.66726e+06	11600000	12500000	6.95856e+06	8.03012e+06
P63073	Eif4e	3.50718e+06	3.61892e+06	3.91809e+06	4.21062e+06	4363395	5004791
P63085	Mapk1	1.35249e+06	561381	1.37131e+06	2094482	1891688	1.13639e+06
P63087-2	Ppp1cc	2.34929e+06	1.13041e+06	1351106	2.1985e+06	1.54639e+06	2.65261e+06
P63094-2	Gnas	2276942	2.2616e+06	1.69471e+06	2.66491e+06	2.97169e+06	3401001
P63101	Ywhaz	14500000	12500000	37400000	65200000	23000000	15200000
P63154	Crnkl1	0	0	0	0	0	0
P63158	Hmgb1	2.13e+06	2.24023e+06	6963154	19400000	5416095	1.95391e+06
P63168	Dynll1	979826	1.38032e+06	4220742	13600000	2.50441e+06	3087204
P63213	Gng2	542479	913310	775562	0	0	0
P63242	Eif5a	1.67793e+06	1.61519e+06	2835431	7196274	3.13408e+06	1868395
P63254	Crip1	13700000	13900000	10400000	12400000	4.83689e+06	5.83875e+06
P63260	Actg1	0	0	0	0	0	0
P63271	Supt4h1a	1212966	1.69597e+06	927896	1368371	1.44897e+06	3.17906e+06
P63276	Rps17	36900000	23500000	44500000	31700000	37200000	29500000
P63321	Rala	330859	0	361491	1.88949e+06	828993	0
P63323	Rps12	18300000	19000000	24200000	18200000	21100000	18400000
P63325	Rps10	6.77023e+06	5.85494e+06	7.82261e+06	5.26293e+06	8587811	5946740
P67778	Phb1	10500000	8658349	10300000	9413439	7602413	8.00703e+06
P67984	Rpl22	56400000	47500000	65800000	51500000	67500000	52000000
P68033	Actc1	22300000	14100000	21200000	25500000	20000000	22700000
P68037	Ube2l3	5.24717e+06	4.69966e+06	5202735	5.70583e+06	5.78257e+06	3875300
P68040	Rack1	17300000	16700000	17600000	15300000	18200000	16700000
P68181-4	Prkacb	11300000	13700000	10700000	10800000	9778765	11500000
P68181	Prkacb	4.34469e+06	11500000	3.07978e+06	5.87976e+06	3.44516e+06	6332805
P68254-2	Ywhaq	2.00592e+06	1714076	4929743	6828902	1.94519e+06	1933472
P68368	Tuba4a	8823339	5.64498e+06	9074425	6.80666e+06	8322994	7811906
P68369	Tuba1a	221000000	181000000	195000000	190000000	172000000	205000000
P68372	Tubb4b	80200000	58700000	86600000	73500000	75100000	90400000
P68404-2	Prkcb	1.74681e+06	1.98845e+06	1310803	1.57643e+06	1.72785e+06	1.51212e+06
P68510	Ywhah	6.27935e+06	4758626	6733104	10500000	7.86013e+06	8728583
P70122	Sbds	0	0	656289	1.23204e+06	0	0
P70168	Kpnb1	1451883	1.68069e+06	2.61886e+06	3.35662e+06	1.60847e+06	1599789
P70202	Lxn	1448051	0	1.63706e+06	2199495	1.36048e+06	1.37952e+06
P70227	Itpr3	706815	664178	409757	597124	0	595257
P70268-2	Pkn1	1.67761e+06	2.17812e+06	1.38665e+06	1.37164e+06	3.10569e+06	2.12801e+06
P70271	Pdlim4	1.13103e+06	1.21817e+06	1.53041e+06	1.78316e+06	2.84566e+06	1.24881e+06
P70279	Surf6	2.14213e+06	3057650	3.96877e+06	3353583	3.75142e+06	2.5818e+06
P70290	Mpp1	1.60014e+06	1.28888e+06	2.00257e+06	1.66725e+06	3.15649e+06	1667232
P70295	Aup1	3.65978e+06	4.18235e+06	5117276	5.47599e+06	4.17744e+06	4.97566e+06
P70296	Pebp1	1563098	1.54655e+06	3.02538e+06	2.01378e+06	1.51393e+06	1.52691e+06
P70302	Stim1	1249765	1.95038e+06	754696	1.31775e+06	1.51332e+06	2.28546e+06
P70303	Ctps2	1.72599e+06	1.41097e+06	2.05772e+06	2.16569e+06	1.67797e+06	1702268
P70333	Hnrnph2	11100000	17600000	12200000	16300000	15100000	22900000
P70335-2	Rock1	0	0	0	0	0	0
P70336-2	Rock2	0	0	0	948005	0	0
P70349	Hint1	426977	1.95768e+06	1.93336e+06	4415750	2019894	1.51098e+06
P70372	Elavl1	4170893	5098356	5.58029e+06	5.79719e+06	5845192	6426601
P70388-2	Rad50	443655	0	508362	513350	668114	509326
P70403	Cux1	1.6199e+06	2.09633e+06	1.63268e+06	1.59578e+06	833472	1.41334e+06
P70404	Idh3g	2473074	2.73984e+06	2371111	2767833	2.98444e+06	2.9764e+06
P70426	Rit1	1.0097e+06	1.28061e+06	1.40235e+06	1.39264e+06	1290594	1.09996e+06
P70429	Evl	1.30483e+06	1.47861e+06	1.0602e+06	1.48434e+06	2.03213e+06	2.02292e+06
P70441	Nherf1	0	0	1.14512e+06	1920444	742513	0
P70460	Vasp	678282	1.35105e+06	910420	2.1887e+06	1165817	1465899
P70670	Naca	2616954	1.09001e+06	3.03819e+06	3.14344e+06	3297126	1.6501e+06
P70694	Akr1c6	0	0	0	0	0	0
P80313	Cct7	1.80121e+06	1.87286e+06	2382479	4.41673e+06	2.28034e+06	2363508
P80314	Cct2	1.60058e+06	2.14279e+06	3.28251e+06	5543261	3.44369e+06	2.72208e+06
P80315	Cct4	2.11145e+06	1.9081e+06	2.42973e+06	3.50048e+06	2103585	1.94859e+06
P80316	Cct5	4.11146e+06	4357916	4336635	4574267	4689316	4.31028e+06
P80317	Cct6a	6.48628e+06	6275282	6363081	9357827	8.06953e+06	9459636
P80318	Cct3	756000000	815000000	537000000	602000000	579000000	993000000
P81269	Atf1	1.90941e+06	1.95306e+06	1733545	2.94737e+06	2538880	3553361
P83870	Phf5a	954031	1.304e+06	1.73916e+06	2.05654e+06	2.21277e+06	1.34246e+06
P83882	Rpl36a	80500000	63700000	94700000	49200000	47100000	37500000
P83887	Tubg1	3.61516e+06	7567182	3.20517e+06	2.94107e+06	2.81627e+06	3613293
P83917	Cbx1	0	0	0	0	0	0
P83940	Eloc	2762049	2.43614e+06	2700846	3.69993e+06	3162326	2.89268e+06
P84075	Hpca	0	0	291315	1.09587e+06	0	0
P84084	Arf5	2712249	4.02546e+06	2231961	3006161	1742367	3.10966e+06
P84089	Erh	8.20226e+06	8959075	11600000	7.03533e+06	15200000	12500000
P84091	Ap2m1	0	0	0	0	0	0
P84096	Rhog	27900000	28900000	27000000	35700000	29400000	37100000
P84099	Rpl19	34400000	55700000	32500000	28600000	31500000	36900000
P84102	Serf2	1.33539e+06	1.86166e+06	0	0	0	0
P84104-2	Srsf3	172000000	153000000	216000000	154000000	186000000	121000000
P97298	Serpinf1	3693695	3.43724e+06	3.95253e+06	7.12634e+06	5.19451e+06	6.00515e+06
P97300-1	Nptn	191934	0	735057	1.61171e+06	0	1.42814e+06
P97310	Mcm2	1.66861e+06	2.19673e+06	1.81698e+06	1.95534e+06	2.34282e+06	2.63398e+06
P97311	Mcm6	1962620	2.3892e+06	1.84092e+06	1.50233e+06	2.23445e+06	2.4876e+06
P97315	Csrp1	1.44704e+06	2.16016e+06	5.73577e+06	15800000	2.75257e+06	2.264e+06
P97350	Pkp1	0	0	0	0	0	0
P97351	Rps3a	78800000	62500000	98900000	73000000	140000000	56200000
P97352	S100a13	0	0	1.34031e+06	3301649	615027	0
P97355	Sms	741920	0	0	0	0	1.47037e+06
P97363	Sptlc2	1.98234e+06	2.20649e+06	1.6325e+06	1487561	780155	1.60615e+06
P97366	Evi5	0	0	0	0	0	0
P97369	Ncf4	0	0	1.07747e+06	0	1.37237e+06	825780
P97371	Psme1	623485	0	1.56583e+06	5.72404e+06	1.02359e+06	423522
P97372	Psme2	462439	377403	445145	0	1.19246e+06	870219
P97376	Frg1	59000000	41700000	54300000	36300000	53800000	32200000
P97379-2	G3bp2	674184	1.3167e+06	0	0	0	834327
P97379	G3bp2	23000000	28000000	14500000	19600000	17300000	34900000
P97390	Vps45	628113	0	0	0	0	470315
P97429	Anxa4	361538	0	2.38371e+06	5.26204e+06	1.38685e+06	0
P97432	Nbr1	870172	362287	1.07397e+06	479863	970901	0
P97447	Fhl1	493270	231264	5.1323e+06	11400000	1.56229e+06	0
P97449	Anpep	0	0	0	0	0	0
P97452	Bop1	0	0	0	873040	1.10997e+06	0
P97461	Rps5	34100000	33200000	32600000	21900000	29700000	20700000
P97494	Gclc	0	0	630597	1.72928e+06	0	0
P97742	Cpt1a	1.89537e+06	2893738	2.04887e+06	2.36941e+06	1197160	2.53118e+06
P97760	Polr2c	0	0	0	0	0	0
P97762	rp9	7.71719e+06	5.29998e+06	11300000	6434861	6.75646e+06	5.46627e+06
P97801	Smn1	0	0	17700000	0	0	0
P97807-2	Fh	1.82022e+06	1.07657e+06	3.10869e+06	2.78099e+06	1.39213e+06	1.72318e+06
P97814	Pstpip1	639403	717534	741214	662402	1.56137e+06	1107851
P97816	S100g	0	0	1.07016e+06	4227239	0	0
P97822-2	Anp32e	0	0	0	0	0	0
P97855	G3bp1	23400000	27100000	12100000	17200000	22000000	33300000
P97868-2	Rbbp6	13600000	5261874	15900000	7.95357e+06	9892575	7145887
P97927	Lama4	0	0	520434	2.96744e+06	0	0
P98064-2	Masp1	0	0	0	0	0	0
P98078-2	Dab2	1.62734e+06	2.06733e+06	1.37778e+06	1.80893e+06	2.43485e+06	2.22706e+06
P98086	C1qa	60700000	75900000	62700000	63500000	67100000	78900000
P99024	Tubb5	125000000	116000000	136000000	125000000	125000000	129000000
P99026	Psmb4	1613719	0	868334	2.64752e+06	385111	0
P99027	Rplp2	5906972	9193712	8561473	8047268	7.83366e+06	7308941
P99029-2	Prdx5	483566	0	2.779e+06	6.90093e+06	1.59842e+06	1.13125e+06
Q00322	Cebpd	0	0	0	0	0	0
Q00519	Xdh	310876	574869	1.28821e+06	2.50512e+06	703550	0
Q00612	G6pdx	5101475	5.06397e+06	5816380	5.68439e+06	5.07559e+06	7774400
Q00623	Apoa1	891645	1.05785e+06	2.92843e+06	1.81538e+06	1.69299e+06	1.55252e+06
Q00897	Serpina1d	0	0	1.4145e+06	3268859	0	0
Q00899	Yy1	3.51054e+06	2134680	3.40697e+06	2552630	3.54694e+06	3.19281e+06
Q00915	Rbp1	0	0	476129	4623696	0	0
Q00PI9	Hnrnpul2	3.6126e+06	5534242	3720514	3.93451e+06	3617474	4247954
Q01149	Col1a2	3630790	0	5071660	15500000	2.60782e+06	5.4534e+06
Q01320	Top2a	1.75904e+06	1.46115e+06	1525409	1.26025e+06	2.0606e+06	2.08781e+06
Q01730	Rsu1	2.71033e+06	3031692	3766908	4.25596e+06	2.90967e+06	2.8636e+06
Q01853	Vcp	6.39779e+06	6.93915e+06	8324086	9256637	8513825	6.71036e+06
Q02013	Aqp1	0	203823	2.66537e+06	8391483	1.2275e+06	233868
Q02053	Uba1	1.96453e+06	1.58436e+06	3.95547e+06	8739786	2.81052e+06	2576851
Q02105	C1qc	302000000	507000000	305000000	349000000	279000000	522000000
Q02248	Ctnnb1	0	0	1.04368e+06	2.3702e+06	452625	0
Q02257	Jup	1.66923e+06	3.98993e+06	1.45903e+06	2.85003e+06	1.71394e+06	1.07863e+06
Q02496	Muc1	0	0	522932	1.026e+06	0	0
Q02566	Myh6	1.2267e+06	0	0	599647	539112	2818905
Q02614	Sap30bp	2268482	1.85687e+06	2753958	1.59851e+06	3.13533e+06	1473882
Q02788	Col6a2	1.2999e+06	0	1.66116e+06	7423706	1.36187e+06	1.15893e+06
Q02819	Nucb1	0	0	1.78302e+06	1050542	89600000	124000000
Q03265	Atp5f1a	77200000	68800000	84100000	99400000	76700000	102000000
Q03347-2	Runx1	1.21159e+06	1.6691e+06	833617	654141	945709	1.0323e+06
Q03963	Eif2ak2	2.71055e+06	4148046	3.02512e+06	2.2948e+06	3743317	3.33071e+06
Q04207-2	Rela	357790	716248	470318	0	0	0
Q04447	Ckb	26200000	23800000	31500000	30100000	44900000	34000000
Q04750	Top1	16500000	5690906	19400000	10600000	16500000	8077712
Q04857	Col6a1	933900	0	3242123	9981158	1232677	2.22542e+06
Q04899	Cdk18	1522937	923182	637601	879277	1.84853e+06	876555
Q05144	Rac2	22200000	23300000	27000000	30300000	22200000	27100000
Q05816	Fabp5	2.49137e+06	3.30467e+06	2.24846e+06	5.98532e+06	1.46952e+06	3099241
Q05910	Adam8	1.85e+06	2367078	1.07356e+06	1.66455e+06	2.60389e+06	2314973
Q05920	Pc	0	0	505712	2.69108e+06	0	0
Q05921	Rnasel	953010	1.07559e+06	1.03442e+06	1.13222e+06	1.91368e+06	1.9555e+06
Q05CL8	Larp7	1083703	802869	856865	0	1.07569e+06	738348
Q05D44	Eif5b	28100000	15900000	28900000	15200000	29700000	18800000
Q06138	Cab39	0	0	343882	1671783	0	0
Q06185	Atp5me	6337331	5598528	7.82454e+06	8675222	6.77951e+06	7021164
Q06318	Scgb1a1	2.11228e+06	1.69465e+06	68500000	184000000	15700000	2.84517e+06
Q06890	Clu	0	461787	814884	1.73418e+06	937742	644077
Q07076	Anxa7	0	757708	592772	2.93683e+06	0	0
Q07797	Lgals3bp	2920891	3.09341e+06	1.77056e+06	1.87476e+06	1.72096e+06	3.53916e+06
Q07832	Plk1	2.08107e+06	1.79074e+06	1.3471e+06	1.3244e+06	1520110	1.30761e+06
Q08024-2	Cbfb	335730	1456474	245974	727464	557173	444924
Q08091	Cnn1	0	352519	205027	2.84247e+06	610552	1.65762e+06
Q08093	Cnn2	50700000	46300000	43700000	329000000	6629325	63200000
Q08288	Lyar	1.75035e+06	0	491966	819538	1.51228e+06	712158
Q08481-2	Pecam1	2177788	0	2.44101e+06	3723467	1.88623e+06	0
Q08857	Cd36	780061	0	10000000	7728266	3.66957e+06	0
Q08943-2	Ssrp1	0	1528847	0	0	741002	1.28857e+06
Q09014	Ncf1	3.77416e+06	5008609	3.15685e+06	3.9498e+06	4.92327e+06	7273200
Q0GNC1-3	Inf2	1.67507e+06	2.15632e+06	1.58656e+06	1367570	1.396e+06	1.631e+06
Q0P678	Zc3h18	1363263	1.76788e+06	2.01297e+06	1357735	1.7576e+06	1.80161e+06
Q0VBK2	Krt80	0	0	0	0	0	0
Q0VBL3-2	Rbm15	3.39427e+06	3.02962e+06	3.61771e+06	2.69793e+06	3.717e+06	3.03021e+06
Q0VG62-1	Rbis	2.13685e+06	2.54567e+06	1.70598e+06	0	3076675	1.52052e+06
Q0VGY8	Tanc1	0	0	0	0	0	0
Q11011	Npepps	2.71654e+06	2611819	2.93213e+06	2.68838e+06	2.64061e+06	3.18453e+06
Q14AX6-3	Cdk12	3.14951e+06	1.80391e+06	2.83596e+06	1888719	3.16109e+06	1.9196e+06
Q1HFZ0-2	Nsun2	2976090	2.02254e+06	2.16292e+06	1.74847e+06	2.07291e+06	1.65301e+06
Q2YDW2-2	Msto1	670230	833785	1.08543e+06	0	0	0
Q31125	Slc39a7	0	0	0	1.01067e+06	0	0
Q3B7Z2	Osbp	279953	0	426862	683337	424340	0
Q3TBT3-2	Sting1	2.49593e+06	2.69474e+06	1.68733e+06	1.89916e+06	1.95867e+06	2.44328e+06
Q3TCJ1	Abraxas2	3.60513e+06	2.97159e+06	3.10928e+06	2.52891e+06	2524635	3.06591e+06
Q3TDD9	Ppp1r21	1.91117e+06	1.48801e+06	1.49489e+06	1882488	1.85045e+06	1.83261e+06
Q3TDN2-2	Faf2	1399436	1.50778e+06	1.37436e+06	1.09752e+06	1084775	1.74252e+06
Q3TEA8-2	Hp1bp3	5.76192e+06	9645764	6326402	5.92758e+06	5.91496e+06	5.39175e+06
Q3TFK5-2	Gpatch4	4206589	1.97911e+06	3.83554e+06	2.39334e+06	4899565	1.98973e+06
Q3THE2	Myl12b	5625486	5.29245e+06	22900000	22200000	10200000	8.28945e+06
Q3THK3	Gtf2f1	5970963	4.18645e+06	6.37906e+06	4458354	7.52858e+06	4.35363e+06
Q3THK7	Gmps	1.18014e+06	0	1.28536e+06	1.38361e+06	2.05934e+06	1.60799e+06
Q3THS6	Mat2a	0	0	0	1.22296e+06	0	0
Q3TIR1-2	Trappc13	594777	861417	686237	1791524	687884	0
Q3TIU4	Pde12	676589	0	1.59276e+06	1.14078e+06	1291949	1.35826e+06
Q3TIV5	Zc3h15	115245	1309887	1.03018e+06	849687	1.14382e+06	858976
Q3TIX9	Usp39	0	3.24662e+06	2610704	1.71352e+06	2804526	3.95663e+06
Q3TJZ6	Fam98a	566406	704725	0	0	0	0
Q3TKT4-2	Smarca4	2072728	1.88272e+06	1.78987e+06	1.84125e+06	2.08834e+06	1.75002e+06
Q3TL44	Nlrx1	759259	0	951410	0	0	0
Q3TLH4-5	Prrc2c	482310	968851	507277	782121	799295	509713
Q3TRM4-2	Pnpla6	8.27248e+06	9360626	5119140	7.12498e+06	6.72531e+06	24900000
Q3TRM8	Hk3	7825251	8441207	10300000	9765454	9603724	13400000
Q3TTY5	Krt2	16800000	0	15400000	0	0	0
Q3TW96	Uap1l1	3.929e+06	3532709	3790216	4.82296e+06	7.19138e+06	4.49924e+06
Q3TWW8	Srsf6	21100000	15900000	32600000	16400000	24600000	17300000
Q3TXS7	Psmd1	1.28057e+06	0	1181839	1.91288e+06	1.73877e+06	2.09803e+06
Q3TYS2	Cybc1	0	693737	0	928456	0	748038
Q3TZX8-2	Nol9	0	0	0	0	0	0
Q3U0J8	Tbc1d2b	1.15567e+06	1.25908e+06	791341	1.01348e+06	1.18307e+06	2.01632e+06
Q3U0M1-2	Trappc9	0	0	0	0	0	767062
Q3U0V1	Khsrp	2.58743e+06	3573670	3.04859e+06	4.70089e+06	4.19796e+06	5.47646e+06
Q3U0V2	Tradd	2.17426e+06	0	1163798	0	348337	0
Q3U1J4	Ddb1	0	323472	843158	1.50547e+06	1.20794e+06	0
Q3U1V8	Map3k9	4912910	0	0	2592455	5.44539e+06	0
Q3U1Y4-2	Dennd4b	1.00939e+06	1.80888e+06	949543	711256	644726	915509
Q3U1Z5	Gpsm3	0	565158	241852	0	0	0
Q3U308	Ctu2	419084	1.18723e+06	524957	568049	455534	1.20975e+06
Q3U7R1	Esyt1	1.51628e+06	1.62506e+06	1.73289e+06	2.70564e+06	2.07658e+06	1655177
Q3U9G9	Lbr	7.94071e+06	9796984	8744872	6.68628e+06	8124265	6.44424e+06
Q3U9N9	Slc16a10	0	1.48329e+06	0	0	0	1.43596e+06
Q3UBX0	Tmem109	90818.6	0	812465	2.72427e+06	337887	0
Q3UDF0-2	Slc2a6	2.54274e+06	3751575	1.78465e+06	1.4349e+06	949330	3.44008e+06
Q3UDK1-2	Trafd1	978247	1.18052e+06	859250	803453	805615	986158
Q3UE31		547983	824953	606831	0	848752	786674
Q3UE37	Ube2z	1.70084e+06	1.06598e+06	1.2933e+06	4.92299e+06	0	1174709
Q3UEB3-2	Puf60	4.81327e+06	2.65468e+06	5.13706e+06	3.06956e+06	4.56159e+06	3.41042e+06
Q3UFK8	Frmd8	2.15658e+06	0	1.51315e+06	859460	1058217	1.58054e+06
Q3UFY8	Trmt10c	3.63697e+06	1.38265e+06	3.19194e+06	1.32512e+06	3483117	1.47532e+06
Q3UGP9	Lrrc58	732147	1.2021e+06	1.0425e+06	770939	1.14381e+06	902120
Q3UGR5	Hdhd2	1.8694e+06	1.17385e+06	1.69905e+06	2.1549e+06	1.43861e+06	2.03046e+06
Q3UH60	Dip2b	0	0	0	0	0	0
Q3UH68-2	Limch1	658434	22300000	590812	3045759	0	0
Q3UHD6-2	Snx27	3.79805e+06	3.64286e+06	3454421	4.11314e+06	4.84556e+06	5.63617e+06
Q3UHX2	Pdap1	1796229	2.09731e+06	2.46811e+06	2.22826e+06	2.97327e+06	2196210
Q3UHX9-2	Spout1	3.11264e+06	2.4422e+06	3.43282e+06	1.95028e+06	3.89832e+06	2.47693e+06
Q3UI43	Babam1	1.09955e+06	1.14536e+06	897228	952068	1.17777e+06	1.58092e+06
Q3UIA2-2	Arhgap17	4.64966e+06	4.67594e+06	4770109	3712435	5208851	5235882
Q3UIR3	Dtx3l	925284	0	870992	524284	1.14605e+06	1.03382e+06
Q3UJB9-2	Edc4	0	0	1.24189e+06	768261	0	561936
Q3UJV1	Ccdc61	0	0	0	0	0	0
Q3UKJ7-2	Smu1	1.15777e+06	0	993446	847593	867814	0
Q3UL36	Arglu1	489000000	170000000	486000000	224000000	412000000	187000000
Q3ULA2-2	Btrc	0	0	0	0	0	0
Q3ULW8-2	Parp3	244763	167888	0	2517221	198876	0
Q3UM18	Lsg1	6277440	3.60658e+06	4.7863e+06	2.90715e+06	3.76409e+06	2.64512e+06
Q3UMB9	Washc4	2.1263e+06	2.44458e+06	1.54026e+06	1.87392e+06	1.50774e+06	2.30654e+06
Q3UMU9-2	Hdgfl2	2.69283e+06	2287489	2.23432e+06	1.82389e+06	3.49531e+06	2322974
Q3UND0-2	Skap2	2.76582e+06	2.12668e+06	2.18826e+06	1.87457e+06	3.97312e+06	3664133
Q3UNZ8	Cryzl2	0	0	0	711764	0	0
Q3UPF5-2	Zc3hav1	4.06912e+06	2.75754e+06	10500000	3.32881e+06	7798114	7216833
Q3UPL0-2	Sec31a	380217	0	584814	882003	0	584815
Q3UQ44	Iqgap2	1.78549e+06	3.12329e+06	2.289e+06	2.39167e+06	2991937	2.38337e+06
Q3UQU0	Brd9	1.43194e+06	1.305e+06	1.75916e+06	1.2155e+06	1.41886e+06	994696
Q3URQ0	Tex10	0	0	0	0	0	0
Q3USH5	Sfswap	26000000	11800000	39400000	10800000	20100000	10100000
Q3UVG3	Fam91a1	0	0	0	0	0	0
Q3UVK0-2	Ermp1	0	0	0	0	0	0
Q3UVL4-2	Vps51	883550	1.02515e+06	1.38653e+06	0	2.26534e+06	1429087
Q3UW53	Niban1	4.82763e+06	6.20292e+06	4.29864e+06	5770837	6594039	6.53612e+06
Q3UZ09	C1rl	994137	158776	0	11300000	7244019	6.26995e+06
Q3UZ39	Lrrfip1	1.02775e+06	943135	0	13100000	1.18707e+06	802402
Q3V1V3	Esf1	1.53003e+06	1.33146e+06	2.17753e+06	1.54435e+06	2.97574e+06	1.69374e+06
Q3V3R1	Mthfd1l	1.69504e+06	2052733	1.62081e+06	1.38236e+06	2.54427e+06	1.98905e+06
Q3V3R4	Itga1	0	0	626485	1.19213e+06	0	0
Q3V4B5	Commd6	1.81773e+06	2.01899e+06	1.51459e+06	1.87067e+06	1.76971e+06	3.10854e+06
Q497I4	Krt35	0	0	0	0	0	0
Q4FK66	Prpf38a	7400201	4.00549e+06	9052482	5.32852e+06	6750682	4285430
Q4FZC9-2	Syne3	0	0	0	0	0	0
Q4KML4	Abracl	0	0	562703	1430129	0	0
Q4LDD4-2	Arap1	1.26621e+06	1.23533e+06	1.03149e+06	1191067	1.52337e+06	919843
Q4QRL3-2	Ccdc88b	1.08229e+06	1.91781e+06	757780	732727	1.12507e+06	1.54878e+06
Q4VA53-3	Pds5b	1.03467e+06	795027	1.22985e+06	980263	1.074e+06	821794
Q4VAA2-2	Cdv3	0	0	220024	782913	147132	0
Q4VAA7	Snx33	1.22194e+06	1.52495e+06	726203	832468	1.11843e+06	2.49021e+06
Q501J6	Ddx17	11900000	14800000	13100000	11100000	13100000	12200000
Q505D1	Ankrd28	971407	1064499	693921	507964	0	1.10672e+06
Q505F5	Lrrc47	3.42112e+06	2.63912e+06	3.24934e+06	2.9034e+06	4684812	2.5462e+06
Q569Z5	Ddx46	5.73733e+06	3.25441e+06	6072361	4.09366e+06	5.23793e+06	3.65002e+06
Q569Z6	Thrap3	8.04696e+06	6.42338e+06	10700000	6445558	11400000	9307596
Q56A08	Gpkow	1372093	444451	981776	0	1.7773e+06	1.01809e+06
Q56A10-2	Znf608	0	0	0	0	0	0
Q571I9	Aldh16a1	1984706	2.33133e+06	1.69048e+06	1.42767e+06	1.67985e+06	2.26885e+06
Q58A65-2	Spag9	21000000	26200000	13300000	18300000	21400000	40300000
Q5BLK4	Tut7	1606470	1.21187e+06	1.52978e+06	1.30979e+06	2511139	2.2431e+06
Q5EG47	Prkaa1	1.91681e+06	1.25563e+06	1.58851e+06	2.16081e+06	2128061	2009871
Q5F2E7-2	Nufip2	828043	1.09094e+06	1.07159e+06	643051	904190	904070
Q5F2E8	Taok1	1.399e+06	0	2.29021e+06	1.62194e+06	736471	966099
Q5FWK3	Arhgap1	849764	0	2.00391e+06	4152625	1160563	757117
Q5HZG4	Taf3	4.45361e+06	2.28275e+06	4894848	2.56834e+06	3.81041e+06	3.17405e+06
Q5KU39	Vps41	0	0	0	0	0	0
Q5NBU8	Xaf1	4.2071e+06	5.16453e+06	4.59664e+06	3.15172e+06	5820663	4.63964e+06
Q5NCR9	Nsrp1	13400000	6.88083e+06	11400000	7.49029e+06	9927050	6382982
Q5ND34-2	Wdr81	1.76414e+06	1.9389e+06	1.68332e+06	1.23364e+06	1.55245e+06	2.32346e+06
Q5SFM8-3	Rbm27	1.35812e+06	1.84344e+06	1952505	4748574	2878841	2122733
Q5SQF8	Sap30l	700424	859770	1.05656e+06	0	710011	1.2304e+06
Q5SQX6	Cyfip2	0	0	0	0	0	0
Q5SSI6	Utp18	0	0	0	0	0	0
Q5SSZ5	Tns3	1.18898e+06	800822	1.3638e+06	1.25361e+06	2.07645e+06	1252863
Q5SUA5	Myo1g	638716	1.55308e+06	575066	1.24593e+06	1310524	622864
Q5SUE8-2	Ankrd40	1.85654e+06	3575280	1.18656e+06	1.63734e+06	2207419	3.84734e+06
Q5SUF2-2	Luc7l3	2.37245e+06	2.37166e+06	3.28209e+06	1.91625e+06	2.19431e+06	1.4464e+06
Q5SVR0-2	Tbc1d9b	1.53511e+06	1.17536e+06	538234	0	0	676144
Q5SW28	Pik3r5	1.04656e+06	1.05478e+06	1.04362e+06	859988	725220	1.04844e+06
Q5SWD9-2	Tsr1	3.49907e+06	1.99816e+06	3.27765e+06	1.71489e+06	3.14864e+06	1.78819e+06
Q5SWU9-2	Acaca	3.46632e+06	4.22416e+06	1.74507e+06	1.79154e+06	2.76114e+06	884102
Q5SXY1-2	Specc1	331449	572071	0	467947	0	0
Q5SYD0	Myo1d	0	0	776247	2.16122e+06	0	0
Q5U3K5	Rabl6	18900000	9602382	15900000	13900000	29000000	11800000
Q5U458	Dnajc11	1.87293e+06	2.22156e+06	1.56573e+06	2.16248e+06	5.02432e+06	2.87436e+06
Q5U5Q9-3	Uimc1	0	0	1.79085e+06	1.98447e+06	1.84157e+06	2.18514e+06
Q5XG71	Utp20	0	0	0	0	0	0
Q5XG73-2	Acbd5	402229	704476	202512	387704	513231	750947
Q5XJY4	Parl	750152	438846	1.11602e+06	830150	482041	920487
Q5XJY5	Arcn1	4.75913e+06	5.60293e+06	5359984	6358030	5452669	5735986
Q60575-2	Kif1b	635835	761485	1.26117e+06	0	669357	1.05679e+06
Q60597-2	Ogdh	1.94237e+06	3.54949e+06	2.93711e+06	5613616	3.45341e+06	2.03355e+06
Q60598	Cttn	0	616994	191532	1.23239e+06	0	0
Q60605-2	Myl6	15400000	13600000	27400000	36200000	26000000	17400000
Q60631	Grb2	1.77816e+06	1.54633e+06	1.04495e+06	2.13882e+06	2.77587e+06	2.332e+06
Q60634-2	Flot2	9068346	16900000	12000000	16000000	11700000	19200000
Q60648	Gm2a	0	0	1.06824e+06	0	0	0
Q60664	Irag2	551320	854300	855424	920208	479774	1.01538e+06
Q60668-3	Hnrnpd	2.12946e+06	2318674	5196636	13500000	3.97324e+06	4.57219e+06
Q60692	Psmb6	59892.1	0	277914	751268	246176	0
Q60710	Samhd1	5.67807e+06	5.64627e+06	6.60042e+06	5988926	5.29792e+06	4634842
Q60714	Slc27a1	2.97479e+06	3040047	3.53914e+06	8.22074e+06	4.11115e+06	3614365
Q60715	P4ha1	2.33924e+06	2284570	2.58424e+06	2.17071e+06	2.37268e+06	3.04749e+06
Q60749	Khdrbs1	1.91791e+06	5.40395e+06	1.67824e+06	2.49708e+06	2284126	2.92857e+06
Q60759	Gcdh	1.94428e+06	1.90134e+06	1.32034e+06	2.24808e+06	2.83523e+06	4.7231e+06
Q60766-2	Irgm1	2.9617e+06	2.60664e+06	3868810	2.46364e+06	3.54292e+06	4629062
Q60769	Tnfaip3	0	117750	0	0	0	0
Q60770-2	Stxbp3	1520095	1.69105e+06	1.90104e+06	1.76735e+06	1.88227e+06	1.79381e+06
Q60780-2	Gas7	1654914	1.08171e+06	1.37349e+06	3.73971e+06	2.0845e+06	1614912
Q60787	Lcp2	2.97385e+06	1.4469e+06	1.65663e+06	1.93398e+06	1.84034e+06	2.96728e+06
Q60854	Serpinb6	37900000	25400000	33800000	34800000	28300000	32900000
Q60855	Ripk1	1.72946e+06	1.55686e+06	1.65871e+06	2.02752e+06	1372734	1.48281e+06
Q60864	Stip1	0	0	606351	1.3755e+06	0	0
Q60865	Caprin1	215000000	258000000	126000000	198000000	217000000	376000000
Q60866-2	Pter	0	0	0	0	0	0
Q60872	Eif1a	4090357	4.58679e+06	5.43329e+06	5.12709e+06	8594277	5.19945e+06
Q60875	Arhgef2	5635273	5748381	5382754	4.69559e+06	6311515	5.48404e+06
Q60902-2	Eps15l1	516857	0	1.07634e+06	1.79278e+06	1.66781e+06	1.69115e+06
Q60925	Dbp	0	199386	0	0	0	167901
Q60930	Vdac2	4696870	7599538	7065896	8123000	5.83785e+06	5.2392e+06
Q60931	Vdac3	1.58226e+06	1.1622e+06	3.01313e+06	10300000	2.64313e+06	2.12833e+06
Q60932-2	Vdac1	1.75403e+06	1955240	8920653	7172441	3373718	3.78007e+06
Q60949-2	Tbc1d1	452072	574564	475619	923821	1.60524e+06	1.15086e+06
Q60972	Rbbp4	5.04668e+06	3.07009e+06	3.79406e+06	3.09825e+06	5.42021e+06	3996166
Q60973	Rbbp7	0	0	0	0	0	0
Q60989	Xiap	5.17371e+06	2717050	6310580	5090343	5394045	14100000
Q60994	Adipoq	0	0	0	0	0	0
Q61001	Lama5	788216	0	2.11206e+06	5.01938e+06	876342	0
Q61029	Tmpo	8.19912e+06	11600000	9852714	8459029	10500000	9638608
Q61033	Tmpo	2035846	12200000	1.43097e+06	1.55474e+06	2.76972e+06	3.36036e+06
Q61072	Adam9	11400000	12800000	9150690	8.03072e+06	7887601	9911588
Q61087	Lamb3	502611	0	715809	1.75949e+06	492831	0
Q61093	Cybb	4646707	5.37171e+06	8.15631e+06	9101267	7.82441e+06	8722696
Q61102	Abcb7	511620	0	512093	810789	721344	559898
Q61103	Dpf2	2.91103e+06	2.21623e+06	5.10352e+06	3.83394e+06	5207700	2.3438e+06
Q61136	Prpf4b	39600000	24600000	51000000	24000000	46100000	23100000
Q61147	Cp	0	0	0	0	0	0
Q61164	Ctcf	1.91328e+06	2.91435e+06	1.20411e+06	2.14414e+06	1.58004e+06	2.91604e+06
Q61166	Mapre1	4355680	5.64748e+06	7.32479e+06	3976071	6.03705e+06	7129445
Q61171	Prdx2	3.57547e+06	2.84624e+06	5.19364e+06	8622446	5964380	4.28562e+06
Q61176	Arg1	0	0	369479	0	0	0
Q61187	Tsg101	548190	0	0	0	1.3691e+06	1643506
Q61191	Hcfc1	1.12782e+06	1.25285e+06	802409	1.4741e+06	1.46015e+06	1975592
Q61194-2	Pik3c2a	796064	0	489790	0	0	0
Q61206	Pafah1b2	0	0	1.05558e+06	3.86745e+06	1.08908e+06	0
Q61207	Psap	0	278564	3.19518e+06	8697035	1.46215e+06	608763
Q61210	Arhgef1	5.88207e+06	7.71661e+06	4.83373e+06	6267731	6.93068e+06	10700000
Q61216	Mre11	1.30622e+06	2.12935e+06	814133	1.51859e+06	1.85905e+06	3046195
Q61233	Lcp1	2.6389e+06	1.31386e+06	3.85589e+06	5461961	3519731	3396858
Q61235	Sntb2	757820	907519	1.86553e+06	2.04488e+06	1.16934e+06	1.51082e+06
Q61263	Soat1	2498151	1.48585e+06	1.61684e+06	1.39474e+06	1.63144e+06	2.0049e+06
Q61292	Lamb2	0	470191	4.67123e+06	6913006	1.10554e+06	928666
Q61301-2	Ctnna2	16000000	0	420604	1.36765e+06	0	0
Q61316	Hspa4	481988	0	922266	1.69922e+06	475534	7959467
Q61335	Bcap31	0	0	2619163	6.25016e+06	726155	0
Q61425	Hadh	522549	1.27357e+06	1.65969e+06	2.88448e+06	1.11805e+06	1.06323e+06
Q61469-2	Plpp1	0	0	0	0	0	0
Q61490	Alcam	0	0	0	0	0	0
Q61495	Dsg1a	0	0	196253	0	0	0
Q61503	Nt5e	0	0	263011	1.15215e+06	0	0
Q61510	Trim25	958016	1.36232e+06	1.38224e+06	1.71203e+06	1492234	863778
Q61545	Ewsr1	0	2.00729e+06	0	0	2.38085e+06	0
Q61550	Rad21	0	0	0	0	0	0
Q61553	Fscn1	0	0	0	0	0	0
Q61554	Fbn1	173835	436055	1.53209e+06	1.38214e+06	549462	676181
Q61584-3	Fxr1	7612577	8690543	6716664	8080977	10500000	14200000
Q61598	Gdi2	3.83947e+06	6144066	4833591	7.24516e+06	5750674	5.74023e+06
Q61599	Arhgdib	0	0	372909	1.17145e+06	0	0
Q61624	Znf148	856701	1.34851e+06	874024	1.32574e+06	1.19183e+06	510850
Q61646	Hp	1.4727e+06	1.02188e+06	308731	1.37191e+06	1030765	1.88273e+06
Q61655	Ddx19a	1726499	1939645	1.60203e+06	1.57851e+06	1176996	2.17255e+06
Q61656	Ddx5	33300000	41000000	39000000	24300000	34100000	21900000
Q61686	Cbx5	955366	0	993952	530674	1.42836e+06	1.04422e+06
Q61703	Itih2	8.34487e+06	11100000	5431342	6457473	7.69145e+06	9714562
Q61704	Itih3	1.22236e+06	4217786	1.92978e+06	3.16861e+06	3.69296e+06	1.51415e+06
Q61749-2	Eif2b4	3.22983e+06	1.73569e+06	2.28491e+06	1.76603e+06	2840577	2894789
Q61753	Phgdh	1.62251e+06	1.99993e+06	1.56332e+06	2.10303e+06	2.28901e+06	3.28083e+06
Q61765	Krt31	0	0	0	0	0	0
Q61768	Kif5b	3.61918e+06	6037510	4.13326e+06	6665322	8072000	7.98766e+06
Q61771	Kif3b	1.19422e+06	1.63873e+06	1.34354e+06	1.38145e+06	1.67442e+06	1.33398e+06
Q61781	Krt14	1.28312e+06	31400000	393678	2358108	0	0
Q61789	Lama3	7214882	7.70261e+06	9650591	14800000	4.00929e+06	4.296e+06
Q61792	Lasp1	0	0	2059413	3.03288e+06	934191	0
Q61838	Pzp	755013	1.05775e+06	837732	4.75671e+06	877398	795620
Q61878	Prg2	0	0	0	0	0	0
Q61879	Myh10	763317	0	2987137	6909735	1.91562e+06	2225668
Q61881	Mcm7	3771033	3.81062e+06	2.4353e+06	2.80593e+06	3435466	3.80268e+06
Q61937	Npm1	3002652	3.33368e+06	5288638	7622651	4.20166e+06	5737115
Q61990-2	Pcbp2	3965064	3.79315e+06	5597069	6.64724e+06	4387712	3.98975e+06
Q62000	Ogn	0	0	1.82787e+06	11200000	1.05572e+06	1.20486e+06
Q62009-2	Postn	0	539511	1.9521e+06	6277084	1.50206e+06	0
Q62011	Pdpn	0	0	277626	864375	0	0
Q62036	Cep131	0	599631	261602	1.48272e+06	0	0
Q62048-2	Pea15	0	0	773167	2511037	0	0
Q62086	Pon2	12400000	11000000	27700000	11900000	19300000	23600000
Q62093	Srsf2	35200000	24300000	56100000	30000000	43400000	25900000
Q62151-10	Ager	1.00605e+06	1198434	33100000	92900000	8762959	637265
Q62165	Dag1	0	0	261538	1.65769e+06	0	0
Q62167	Ddx3x	20100000	32900000	22400000	16900000	18400000	16300000
Q62168	Krt32	0	0	0	0	0	0
Q62186	Ssr4	2.00197e+06	2.32947e+06	2220609	1.81037e+06	1.65083e+06	2.49809e+06
Q62189	Snrpa	818969	1.02124e+06	742292	1.47279e+06	0	0
Q62230	Siglec1	1.6432e+06	2.11644e+06	874274	1.37977e+06	1294968	1.34575e+06
Q62261	Sptbn1	3.23767e+06	1.40713e+06	16200000	39400000	8625865	6968497
Q62311	Taf6	1.27417e+06	0	1.39348e+06	546803	1.43719e+06	858454
Q62318	Trim28	6.55906e+06	8772590	5.56534e+06	6038105	6806650	8766481
Q62348	Tsn	497528	1.02936e+06	441419	837431	722841	459648
Q62351	Tfrc	3.24142e+06	3.52405e+06	3.41877e+06	3.71725e+06	2898542	4.14869e+06
Q62376	Snrnp70	899988	1.3702e+06	1.78055e+06	1.94571e+06	599986	1.90306e+06
Q62377	Zrsr2	2.43586e+06	682467	1.94621e+06	760482	1.50078e+06	836684
Q62383	Supt6h	0	0	0	0	0	1.01727e+06
Q62393-2	Tpd52	306770	523037	453034	874854	352000	937874
Q62418-2	Dbnl	0	0	0	624445	693204	0
Q62419	Sh3gl1	60100000	78900000	38300000	64000000	78700000	184000000
Q62425	Ndufa4	8.09152e+06	8551128	11200000	7148032	7.42903e+06	8266793
Q62426	Cstb	982553	1.15334e+06	1.35772e+06	1920606	7.20111e+06	1.77696e+06
Q62432-2	Smad2	1.13621e+06	1.33742e+06	1.43386e+06	1.88017e+06	2.21794e+06	1668143
Q62448-2	Eif4g2	1.18679e+06	0	0	0	1.11813e+06	786127
Q62465	Vat1	3.96245e+06	2.12633e+06	3677567	8337177	2.56277e+06	3.13229e+06
Q62470-3	Itga3	0	0	1.3874e+06	3.55012e+06	0	0
Q62481	Vps72	2.83365e+06	1634637	2.31112e+06	924564	2.71476e+06	1494482
Q62511	Zfp91	878635	390703	874818	988826	853115	710029
Q62523	Zyx	3.55984e+06	2.84221e+06	4.26454e+06	5092722	5.7064e+06	4115248
Q63844	Mapk3	0	589804	985270	2716207	1.84051e+06	2.60468e+06
Q63871	Polr2k	1.50854e+06	933294	1.19685e+06	878904	1382027	0
Q63918	Cavin2	2.14809e+06	2.07358e+06	14500000	46500000	4556210	1130159
Q63932	Map2k2	1.87125e+06	2.92315e+06	1.39783e+06	1.99592e+06	1.24807e+06	1.86914e+06
Q64008	Rab34	4.18169e+06	3358346	4.33863e+06	3.85651e+06	4214623	9465884
Q64010-2	Crk	0	0	0	0	0	0
Q64012-2	Raly	1.59265e+06	3933742	2.61362e+06	3290059	3.10368e+06	3078969
Q640M1	Utp14a	14000000	6.18738e+06	15600000	6.13072e+06	12900000	6.86175e+06
Q640N3-2	Arhgap30	2.35743e+06	2665338	2.68001e+06	2244020	2.63258e+06	2.86788e+06
Q64133	Maoa	0	1.35334e+06	2.39083e+06	2.99487e+06	2784749	1713658
Q64152-2	Btf3	6.63321e+06	3.6074e+06	6737941	5.83302e+06	7685410	5154532
Q64213-2	Sf1	2.3991e+06	1.65487e+06	1.78274e+06	2.04116e+06	2.005e+06	1606373
Q64261	Cdk6	4.27852e+06	3.83834e+06	4486221	3.62582e+06	4062296	4450302
Q64282	Ifit1	3.13088e+06	4.26083e+06	3.10138e+06	3.35756e+06	3.02971e+06	4315525
Q64310	Surf4	1.18675e+06	0	853392	0	0	786392
Q64314-2	Cd34	0	0	0	0	0	0
Q64324	Stxbp2	3339766	3.49632e+06	3.43091e+06	3.01072e+06	3.26917e+06	3.81184e+06
Q64337-2	Sqstm1	1.88107e+06	1.94274e+06	928029	1778497	2.38018e+06	2.79999e+06
Q64339	Isg15	3074302	4.78373e+06	4513100	3.48734e+06	4.28458e+06	4.16564e+06
Q64374	Rgn	0	0	1.2431e+06	0	0	0
Q64433	Hspe1	830346	1.37744e+06	5.82713e+06	7162369	3.29927e+06	4.63272e+06
Q64442	Sord	0	0	444908	751220	568506	0
Q64444	Ca4	0	0	1.34021e+06	4476876	0	0
Q64462	Cyp4b1	0	0	1.67722e+06	5.40324e+06	1.07294e+06	0
Q64471	Gstt1	0	0	3.22325e+06	4694314	0	0
Q64475	H2bc3	46700000	101000000	293000000	124000000	137000000	67100000
Q64511	Top2b	0	0	0	1347544	899360	563957
Q64514-2	Tpp2	1250944	978889	0	1.72009e+06	2.15344e+06	1.04282e+06
Q64522	H2ac21	672541	0	1.82767e+06	4698186	0	714917
Q64524	H2bc21	216000000	202000000	544000000	637000000	584000000	239000000
Q64525	Hist2h2bb	21000000	25800000	94400000	194000000	45300000	26000000
Q64674	Srm	1.02969e+06	826630	1.34502e+06	1332148	1.78737e+06	1.35568e+06
Q64727	Vcl	2.08942e+06	2.73433e+06	5008433	12900000	3066727	5.40509e+06
Q64737-2	Gart	2032393	1.53238e+06	1.86613e+06	2.25219e+06	1.81797e+06	2.96975e+06
Q673H1	Tusc1	708949	3373685	705541	0	0	0
Q68FD5	Cltc	15600000	16700000	20800000	17700000	22900000	18600000
Q68FF6	Git1	1.73776e+06	2309235	1.52002e+06	1.50705e+06	2.5062e+06	2765032
Q68FH4	Galk2	1.56645e+06	1582454	1.43705e+06	1.73499e+06	1.90844e+06	2.31387e+06
Q68FL4-2	Ahcyl2	236123	0	416244	1.39842e+06	0	0
Q68FL6	Mars1	2.38306e+06	1.95907e+06	1.70339e+06	1.89487e+06	2269200	2.29178e+06
Q69Z37	Samd9l	1.42255e+06	1.35095e+06	1857682	1.56737e+06	1.62852e+06	2.68728e+06
Q69Z38	Peak1	2809624	4.06669e+06	1865795	2.89826e+06	3.84054e+06	6455457
Q69Z99	Znf512	1.06827e+06	1.00364e+06	1.53702e+06	782644	1.6192e+06	1.19318e+06
Q69ZN7-4	Myof	0	0	1185143	2506595	597631	620251
Q69ZQ2	Isy1	0	0	0	0	0	0
Q6A028	Swap70	546940	0	0	596240	841715	0
Q6A065	Cep170	1.63693e+06	1.67996e+06	1.3165e+06	2.20292e+06	2.4339e+06	2.00431e+06
Q6A068	Cdc5l	14900000	10100000	13300000	10700000	23500000	13700000
Q6A0A2-2	Larp4b	1.31365e+06	0	466249	889502	1.4834e+06	1.3507e+06
Q6A0A9	FAM120A	3487959	4469567	2.97746e+06	2612618	3.96717e+06	5270224
Q6A0D4	Rftn1	1.03295e+06	0	1.02641e+06	0	0	1.12954e+06
Q6DFW4	Nop58	3279459	2.25537e+06	3.30461e+06	2.38039e+06	3.46055e+06	2.24175e+06
Q6DID3	Scaf8	505247	1.13404e+06	530632	794799	1.08226e+06	1.59369e+06
Q6DID5	Pwwp3a	0	0	1.05371e+06	718501	0	975706
Q6DVA0	Lemd2	579802	2476963	800233	9179671	0	2.30678e+06
Q6EBV9	Atg9b	0	0	0	0	0	0
Q6GQT1	A2m	4047779	4.91194e+06	2.27109e+06	3.07174e+06	4665016	3.7501e+06
Q6GSS7	Hist2h2aa2	25100000	38400000	40300000	28800000	39700000	17300000
Q6IFX2	Krt42	6.75515e+06	11800000	14300000	20700000	7563747	6.95354e+06
Q6IFX3	Krt40	0	0	0	0	0	0
Q6IFX4	Krt39	0	0	0	0	0	0
Q6IFZ6	Krt77	0	0	0	0	0	65200000
Q6IFZ9	Krt74	0	0	1397417	7.55968e+06	2.62696e+06	0
Q6IME9	Krt72	0	0	568073	824223	0	0
Q6IRU2	Tpm4	1519121	1.10989e+06	5.66951e+06	17500000	5060402	4287090
Q6IRU5-2	Cltb	516535	695128	1.00142e+06	3.54724e+06	939237	894295
Q6KAR6	Exoc3	1552314	1.78672e+06	933604	1.02798e+06	1.20226e+06	1.34818e+06
Q6NS46	Pdcd11	0	0	0	0	0	0
Q6NSQ7	Ltv1	15800000	8593884	17000000	10900000	16400000	11500000
Q6NTA4	Rragb	4049281	4530101	2.87817e+06	3.67435e+06	4.14634e+06	5.82265e+06
Q6NV83-2	U2surp	30400000	15500000	33200000	17500000	20800000	15300000
Q6NVF9	Cpsf6	2.4299e+06	4293890	2.43118e+06	3.45988e+06	4996329	5.43125e+06
Q6NXH9	Krt73	0	0	0	0	0	0
Q6NZB0	Dnajc8	0	0	814456	1.33925e+06	865738	331445
Q6NZF1	Zc3h11a	0	0	0	0	0	0
Q6NZJ6	Eif4g1	1.3229e+06	1517343	1.09447e+06	1.24003e+06	2.52452e+06	1.82053e+06
Q6NZK5	Kiaa1328	0	0	0	0	0	0
Q6NZN0-2	Rbm26	626228	0	0	477541	0	0
Q6P069-2	Sri	549543	1.60099e+06	1.42099e+06	3.07972e+06	1.20924e+06	756151
Q6P1F6	Ppp2r2a	2.97773e+06	3.75243e+06	3364899	2.88266e+06	3.72069e+06	3.39771e+06
Q6P3A4-2	Vsig8	0	0	0	0	0	0
Q6P3B9	Rbfa	6.24936e+06	3.60332e+06	5372208	3072679	5216197	2.37873e+06
Q6P4T2	Snrnp200	2238260	2.49075e+06	3.49934e+06	3543295	2.59093e+06	3.65447e+06
Q6P542	Abcf1	13400000	9714846	12300000	8177820	15600000	8853347
Q6P549	Inppl1	2.43268e+06	3.53764e+06	2.47452e+06	3306971	4.01967e+06	4264975
Q6P5B0	Rrp12	5.68661e+06	1.70531e+06	5.43986e+06	3136686	5333621	3.51438e+06
Q6P5E4	Uggt1	0	0	0	0	0	0
Q6P5F9	Xpo1	507907	373874	510351	1.41713e+06	1.59753e+06	0
Q6P5H2	Nes	499383	3.01604e+06	580565	3.34603e+06	0	0
Q6P8I4	Pcnp	0	0	0	0	0	0
Q6P8X1	Snx6	1.53503e+06	2.01194e+06	2.69563e+06	2.80229e+06	3.21136e+06	2.96188e+06
Q6P9N1	Hycc1	0	535893	343659	0	267276	819984
Q6P9P6	Kif11	1.12594e+06	1907761	708614	1.45776e+06	1.63397e+06	3289796
Q6P9Q4	Fhod1	891634	811850	1.02753e+06	493757	439440	1.19521e+06
Q6P9Q6-2	Fkbp15	18200000	20400000	12200000	18600000	18400000	36000000
Q6PAC3	Dcaf13	336600	686756	0	286314	583010	0
Q6PAM0	Prkab2	1.66285e+06	1.12773e+06	712890	0	1118412	1.56933e+06
Q6PAR5-2	Gapvd1	1.63294e+06	1.81147e+06	886327	1516125	1.67167e+06	1.68893e+06
Q6PAV2-2	Herc4	0	895235	939641	1.24853e+06	0	2.27804e+06
Q6PCP5-2	Mff	864943	0	0	0	0	0
Q6PDG5-2	Smarcc2	1.39459e+06	1.34937e+06	1.38542e+06	1.17831e+06	1.81855e+06	1515014
Q6PDL0	Dync1li2	0	1.18136e+06	1.96146e+06	2.37352e+06	0	1.72576e+06
Q6PDM2	Srsf1	15600000	11100000	20700000	16700000	18500000	11900000
Q6PDN3-3	Mylk	0	0	802843	2.35442e+06	0	470253
Q6PDQ2	Chd4	4.04173e+06	3.16382e+06	4.11921e+06	2888376	3.33682e+06	3.00976e+06
Q6PE01	Snrnp40	0	1538923	647565	0	0	0
Q6PFD9	Nup98	811790	1.03801e+06	703959	1.22972e+06	753130	2.04787e+06
Q6PFQ7	Rasa4	3817740	4.10216e+06	3329400	3.41263e+06	3.33069e+06	4.13126e+06
Q6PFR5	Tra2a	646452	1.781e+06	964506	656490	3815928	1771051
Q6PGC1	Dhx29	2285587	2.55771e+06	1.793e+06	2.10712e+06	2234551	2982035
Q6PGG2	Gmip	1.78355e+06	2.06831e+06	2032695	1.83933e+06	1.77014e+06	2.23235e+06
Q6PGG6	Gnl3l	1.2251e+06	762453	1.61924e+06	797005	1.95538e+06	1.23698e+06
Q6PGH1	Bud31	1.01153e+06	1.22081e+06	943553	949306	2.25035e+06	1.22401e+06
Q6PHN9	Rab35	305779	279033	180737	0	0	189803
Q6PHZ2-2	Camk2d	1.73939e+06	2603634	1.76831e+06	1.80204e+06	1.95436e+06	2.14284e+06
Q6PIC6	Atp1a3	3534187	3.76671e+06	2.42062e+06	3.05692e+06	2.85529e+06	3.76576e+06
Q6R891	Ppp1r9b	0	0	0	0	0	0
Q6URW6-2	Myh14	11900000	169673	5774384	14900000	2125786	3.80704e+06
Q6VNB8	Wdfy3	952868	1.23757e+06	652435	894794	1.32763e+06	1.39938e+06
Q6WKZ7	Nostrin	1.10213e+06	1.49036e+06	1.28641e+06	1483953	2.54601e+06	1.09306e+06
Q6WKZ8-2	Ubr2	4.17371e+06	4.67044e+06	3.46854e+06	3.76208e+06	4200165	5867880
Q6Y5D8-3	Arhgap10	680320	442151	1.11154e+06	2.00791e+06	845750	939725
Q6Y7W8-2	Gigyf2	577305	828846	633161	623213	843873	946415
Q6YGZ1	Hpse	0	0	0	0	0	303720
Q6ZPE2-2	Sbf1	1.24869e+06	1.6639e+06	855004	1.19003e+06	1.09843e+06	1.05501e+06
Q6ZPF4-2	Fmnl3	0	0	0	0	0	0
Q6ZPZ3	Zc3h4	10500000	4.37439e+06	11200000	6.19193e+06	11700000	4.65352e+06
Q6ZQ38	Cand1	1.40182e+06	1.81425e+06	2.37458e+06	3518416	2.20244e+06	3.03925e+06
Q6ZQ58	Larp1	281973	473878	665499	0	478362	634166
Q6ZQA0-2	Nbeal2	1.34155e+06	1.48916e+06	931954	890099	1.20764e+06	2.12008e+06
Q6ZQF0	Topbp1	1.2393e+06	2.0366e+06	1281857	1.43617e+06	2.25177e+06	2.65078e+06
Q6ZQK5-2	Acap2	172671	0	205315	381864	0	0
Q6ZQL4	Wdr43	0	0	0	0	0	0
Q6ZQM8	Ugt1a7	3.79026e+06	0	1.19039e+06	0	0	1.38279e+06
Q6ZWM4	Lsm8	0	0	0	0	0	0
Q6ZWN5	Rps9	19500000	33800000	19800000	18800000	17400000	21200000
Q6ZWQ7	Spcs3	2160295	1.75271e+06	2508019	2.15299e+06	1972981	2.50954e+06
Q6ZWU9	Rps27	13100000	12000000	19200000	14900000	13100000	11100000
Q6ZWV3	Rpl10	36900000	42500000	39700000	30300000	34400000	27200000
Q6ZWV7	Rpl35	288000000	254000000	415000000	201000000	199000000	157000000
Q6ZWX6	Eif2s1	9374594	6.6949e+06	8595432	6870433	10100000	8.18825e+06
Q6ZWY3	Rps27l	7.5432e+06	6.74983e+06	6856390	7764934	6.74773e+06	8.31594e+06
Q6ZWY8	Tmsb10	0	0	0	0	0	0
Q76KJ5	Polr1g	0	0	639926	0	906224	536194
Q76MZ3	Ppp2r1a	1.17261e+06	1.23411e+06	2.68737e+06	6.41895e+06	2452520	3.60578e+06
Q78PY7	Snd1	16300000	20600000	16900000	18500000	22500000	31400000
Q78WZ7	Polr1f	5.19706e+06	2.61984e+06	3120110	3.34103e+06	5.62112e+06	3.41053e+06
Q78ZA7	Nap1l4	0	0	0	0	0	0
Q791T5-2	Mtch1	3.01844e+06	2491357	2.66678e+06	2.39618e+06	2.07827e+06	2427426
Q791V5	Mtch2	1.30473e+06	1.34619e+06	1.13946e+06	3.72585e+06	2.44135e+06	1.459e+06
Q7JJ13-2	Brd2	4.44051e+06	2.82164e+06	4807861	2222464	4.43345e+06	2769170
Q7M6Y3-2	Picalm	7.08297e+06	8688860	6076801	7604668	8934984	9081473
Q7TMB8	Cyfip1	21100000	22600000	18600000	18100000	18500000	22400000
Q7TMD7	Dsg4	0	0	0	0	0	0
Q7TMF3	Ndufa12	2.08161e+06	1.43422e+06	2.23764e+06	2.18168e+06	1125112	2.43923e+06
Q7TMK6	Hook2	438399	360481	584936	270608	0	579757
Q7TMK9-2	Syncrip	1.51651e+06	2534587	1.52458e+06	3.60129e+06	1.90521e+06	2.44331e+06
Q7TMM9	Tubb2a	7910800	7.48635e+06	10300000	9826671	7.02466e+06	11600000
Q7TMQ7	Wdr91	1.43423e+06	1.1318e+06	1.32221e+06	1.64713e+06	2165672	2.53177e+06
Q7TMY4-2	Thoc7	0	0	0	0	0	0
Q7TNC4-4	Luc7l2	9895293	6.44776e+06	10200000	6.97253e+06	8.33178e+06	5.08918e+06
Q7TNG5-2	Eml2	0	186681	0	1.59022e+06	0	0
Q7TNV0	Dek	27000000	20300000	27300000	16600000	28900000	15700000
Q7TPH6-2	Mycbp2	21300000	74700000	24300000	13600000	30700000	90600000
Q7TPM1	Prrc2b	0	0	0	0	0	0
Q7TPR4	Actn1	680786	308762	2.70702e+06	7123379	1.0977e+06	991708
Q7TPV4	Mybbp1a	2.77132e+06	3.68564e+06	2.93606e+06	3.38832e+06	3.74827e+06	3035806
Q7TQD2	Tppp	0	0	0	2328066	0	939581
Q7TQH0-2	Atxn2l	514724	1.14539e+06	778609	745164	1.12148e+06	1.20055e+06
Q7TQI3	Otub1	5.23098e+06	4.51742e+06	5.71162e+06	5464384	4.71489e+06	4.85306e+06
Q7TQK5	Ccdc93	4.96907e+06	3765723	4.18928e+06	3.88537e+06	3432757	4.73603e+06
Q7TSC1	Prrc2a	3.14192e+06	4.63181e+06	2.35007e+06	3.21086e+06	3846259	7.44631e+06
Q7TSI3	Ppp6r1	2.60104e+06	3.56507e+06	1.33761e+06	2.7046e+06	3.48474e+06	4926709
Q7TSV4	Pgm2	3.01517e+06	2.85304e+06	922828	1.70813e+06	966835	2432595
Q7TT37	Elp1	394513	0	0	0	560495	0
Q7TT50	Cdc42bpb	238526	1.38349e+06	326882	838964	1.24891e+06	1.67806e+06
Q80SU7	Gvin1	3258740	3.28389e+06	2.16586e+06	2.37354e+06	2.7157e+06	3.08775e+06
Q80SW1	Ahcyl1	877326	0	1.1797e+06	1.1205e+06	650878	1.22237e+06
Q80SY4	Mib1	0	0	0	0	0	0
Q80SY5	Prpf38b	3.34237e+06	2.00972e+06	3.87036e+06	2.61051e+06	3.00286e+06	1.92691e+06
Q80SZ7	Gng5	1.01547e+06	1172546	2.75682e+06	1.92804e+06	1.76067e+06	1.50433e+06
Q80TI0-4	Gramd1b	0	0	0	0	0	0
Q80TJ7	Phf8	1.88265e+06	2.0637e+06	1.50622e+06	1.48075e+06	2.84378e+06	2.56095e+06
Q80TY0-2	Fnbp1	1.30988e+06	1.37935e+06	1.88896e+06	785522	1.14282e+06	1.32266e+06
Q80U28-10	Madd	507260	570056	629091	464999	805262	912285
Q80U58-2	Pum2	1.01728e+06	1.09524e+06	1.01171e+06	933103	0	502258
Q80U72-2	Scrib	0	0	0	0	1.32696e+06	726740
Q80U93	Nup214	1.20726e+06	1.21599e+06	1.07604e+06	2.3283e+06	0	1.04055e+06
Q80UG5-3	Septin9	2613430	3059498	2.83408e+06	3.91218e+06	2784503	2664403
Q80UJ7	Rab3gap1	1.21415e+06	773704	588498	1.02194e+06	687086	1.0773e+06
Q80UM3	Naa15	2.23727e+06	1.79477e+06	1.62091e+06	1.40462e+06	1.366e+06	1.9142e+06
Q80UM7	Mogs	703600	504447	717988	656538	968225	792480
Q80UP3	Dgkz	1.5853e+06	1014257	1.60959e+06	911365	2.11139e+06	1.2298e+06
Q80UU1	Ankzf1	0	0	0	0	0	0
Q80UW8	Polr2e	0	438419	584137	596777	0	704113
Q80UY2-2	Kcmf1	1.61237e+06	1.46971e+06	1.11701e+06	1.00613e+06	0	979847
Q80UZ2-2	Sdad1	2.05735e+06	1.35523e+06	1.32413e+06	1.55263e+06	2.14351e+06	689418
Q80VD1	Fam98b	0	0	0	0	0	0
Q80VQ0	Aldh3b1	1127113	1795128	1.17792e+06	1.8958e+06	1.35873e+06	1.57072e+06
Q80WC7-2	Agfg2	814765	1.10758e+06	449449	372541	0	1.122e+06
Q80WJ7	Mtdh	9894323	7.24618e+06	7.53037e+06	8.00952e+06	13200000	9033554
Q80WQ2	Vac14	0	0	0	0	0	0
Q80WQ6	Rhbdf2	513968	665529	918435	884921	1.07595e+06	638356
Q80WT5-2	Aftph	899241	1.41049e+06	950716	1.33591e+06	1.04495e+06	2433572
Q80X41-2	Vrk1	1.1601e+06	979752	1.0664e+06	635761	1400044	698447
Q80X50-2	Ubap2l	0	0	5.98097e+06	11200000	1.03519e+06	2.44341e+06
Q80X66	Btbd10	0	0	0	0	0	0
Q80X72	Lrrc15	0	0	0	0	0	0
Q80X90	Flnb	0	0	1.16048e+06	3.87477e+06	0	1.55997e+06
Q80XA6	Reps2	1273495	1.07149e+06	2.15502e+06	843437	2.50209e+06	2.09e+06
Q80XC6	Nrde2	2.90732e+06	1.99197e+06	3940031	1.73088e+06	2955457	1.61429e+06
Q80XI4	Pip4k2b	2.13671e+06	2.46637e+06	1.3636e+06	1.6747e+06	1.61455e+06	3.83209e+06
Q80XL6	Acad11	0	0	0	0	0	0
Q80XN0	Bdh1	0	0	0	0	0	0
Q80XP8	Fam76b	1.73413e+06	1.36745e+06	1.67311e+06	930313	1.44607e+06	1.32893e+06
Q80XU3	Nucks1	5981105	3972633	6.27701e+06	5.28217e+06	7.2421e+06	3449338
Q80Y44	Ddx10	0	0	0	0	0	0
Q80YR5	Safb2	190003	1.10147e+06	484274	0	0	0
Q80YW0	Cyth4	750536	2.79814e+06	938700	527707	1.37309e+06	975680
Q80ZS3	Mrps26	8891694	1.90511e+06	6.01118e+06	2213992	15900000	10700000
Q810A7	Ddx42	1.70673e+06	2687494	1221257	1.79546e+06	2.25717e+06	3.18178e+06
Q810B6	Ankfy1	3.96676e+06	3.79499e+06	3231609	3.79435e+06	4734677	6848278
Q810S1	Mcub	1.41367e+06	1560116	1.50367e+06	1.21775e+06	1.81719e+06	2.46105e+06
Q811M1	Arhgap15	0	658484	333527	0	684775	392913
Q811Q9-2	Pcyt1b	976388	0	957472	1388133	1.62421e+06	1.72431e+06
Q8BFP9	Pdk1	1692470	1.71344e+06	1.03884e+06	1.33399e+06	1.33879e+06	1137719
Q8BFQ4	Wdr82	4661394	2699174	4.9283e+06	2.92391e+06	4926873	3925483
Q8BFR5	Tufm	20900000	23500000	18100000	23700000	25200000	35700000
Q8BFW7-5	Lpp	0	324181	138711	818937	0	0
Q8BFZ3	Actbl2	347000000	2.03368e+06	4715918	27100000	0	517000000
Q8BFZ9	Erlin2	1.56756e+06	1.94483e+06	1.5943e+06	1.37145e+06	1.93224e+06	1.73046e+06
Q8BG05-2	Hnrnpa3	11500000	16900000	12700000	13800000	12800000	22300000
Q8BG05	Hnrnpa3	872338	1.4079e+06	839870	1.06475e+06	0	1.28563e+06
Q8BG17	Nol12	4.77803e+06	3.86981e+06	5886657	2717539	5506354	3100752
Q8BG32	Psmd11	1.30935e+06	1.45875e+06	1.82126e+06	3.01157e+06	2.7837e+06	1.77765e+06
Q8BG51-2	Rhot1	1.85386e+06	1.86026e+06	1.68134e+06	1.81467e+06	1.54617e+06	1.94504e+06
Q8BG67-2	Efr3a	0	0	0	0	0	0
Q8BG79	Cwf19l2	3896859	2.30375e+06	5089495	2.07916e+06	4.14208e+06	2309504
Q8BG81	Poldip3	538132	843561	613100	0	635093	675088
Q8BGA9	Oxa1l	2.11659e+06	2470380	2.67707e+06	2.35035e+06	2.19302e+06	2.5094e+06
Q8BGB5	Limd2	1.20524e+06	1.36454e+06	1.30508e+06	787921	1.27484e+06	1.78437e+06
Q8BGD9	Eif4b	3703510	6.48989e+06	3637442	3.65649e+06	5.29213e+06	3.90759e+06
Q8BGH2	Samm50	0	0	2.16542e+06	2.58893e+06	2.7452e+06	0
Q8BGQ1-2	Vipas39	1784999	2.08249e+06	1.61561e+06	1099968	2401507	2.46662e+06
Q8BGQ7	Aars1	1.59536e+06	1.09582e+06	1.96417e+06	1.86235e+06	1.92489e+06	1750859
Q8BGS1-2	Epb41l5	0	0	263809	1.08977e+06	0	0
Q8BGS7-2	Cept1	5255716	5133457	5104384	5.01738e+06	7.00496e+06	7967717
Q8BGT7	Smndc1	1.02844e+06	0	901542	1.55194e+06	2.1067e+06	1.08196e+06
Q8BGZ7	Krt75	0	0	0	0	0	0
Q8BH02	Tor4a	1.40544e+06	1554845	1.3208e+06	828885	1.49671e+06	1.12396e+06
Q8BH04	Pck2	3.2488e+06	3034106	3650377	3.1077e+06	3.31948e+06	3.20375e+06
Q8BH43	Wasf2	2786009	3538017	3.8272e+06	4652526	6539814	5005197
Q8BH59	Slc25a12	8.01151e+06	8609078	7.98239e+06	7612414	7.17913e+06	10500000
Q8BH61	F13a1	22100000	21500000	19600000	19600000	18700000	27400000
Q8BH64	Ehd2	790359	0	8600092	30400000	1950928	948448
Q8BH74	Nup107	0	0	0	0	0	0
Q8BH75	Rnf41	0	0	0	0	0	0
Q8BH86-2	Dglucy	925880	771531	964814	0	1.11398e+06	1.20337e+06
Q8BH93	Mapk1ip1l	0	1.09812e+06	0	0	0	0
Q8BH95	Echs1	639832	572765	814140	3.26679e+06	987347	749218
Q8BHB4	Wdr3	0	0	0	0	0	0
Q8BHC0	Lyve1	0	0	671757	1.55219e+06	0	0
Q8BHD7-2	Ptbp3	0	1.18722e+06	244556	1215716	0	1.3724e+06
Q8BHG9	Cggbp1	3.92186e+06	3.56913e+06	3.48451e+06	3.29246e+06	5.11571e+06	2.03546e+06
Q8BHJ5	Tbl1xr1	360969	952575	341678	441007	0	0
Q8BHJ9	Slu7	4590796	2.35564e+06	4799640	2.50347e+06	4229361	2.86177e+06
Q8BHL3	Tbc1d10b	50000000	29900000	48400000	26700000	60300000	37200000
Q8BHL4	Gprc5a	0	0	3.47587e+06	9849492	1.50795e+06	0
Q8BHL5-2	Elmo2	0	0	0	0	0	0
Q8BHL8	Psmf1	2.21357e+06	2297645	2157848	1.42861e+06	1.68636e+06	2.76744e+06
Q8BHN3-2	Ganab	660876	818848	1.79588e+06	3.12913e+06	1.83124e+06	1.71205e+06
Q8BHS3	Rbm22	738786	0	0	0	0	0
Q8BHZ0	Cyria	254204	0	319096	713266	0	172082
Q8BI08	Mal2	0	0	4.49067e+06	12500000	1.919e+06	0
Q8BI72	Cdkn2aip	572481	821296	558081	0	193872	0
Q8BIF9	Znf787	1.34059e+06	966785	1.8723e+06	1.14293e+06	1.85499e+06	1.07778e+06
Q8BIJ7	Rufy1	372866	0	0	0	0	0
Q8BIZ6	Snip1	2710376	15300000	3.96983e+06	0	3.32676e+06	2.21905e+06
Q8BJ71	Nup93	2.07272e+06	1.69382e+06	1.62806e+06	2.75621e+06	1.62092e+06	2145352
Q8BJA3-2	Hmbox1	0	7.72491e+06	0	801712	515357	0
Q8BJH1	Zc2hc1a	870367	879025	758028	897163	1.05855e+06	0
Q8BJS4-2	Sun2	0	0	0	0	0	0
Q8BJZ4	Mrps35	0	803680	658875	0	0	818090
Q8BK08	Tmem11	0	0	0	1661469	1.77231e+06	1.05234e+06
Q8BK64	Ahsa1	3.60789e+06	4611088	3.45418e+06	4144669	4.3322e+06	4.61166e+06
Q8BK67	Rcc2	13600000	10100000	13800000	8.01939e+06	15100000	9178008
Q8BKC5	Ipo5	741794	0	0	794367	1.51364e+06	1477287
Q8BKI2	Tnrc6b	405753	526313	201002	0	329609	780988
Q8BKJ9	Sirt7	1.36344e+06	13000000	909017	631312	6278209	13800000
Q8BKS9	Pum3	1.24409e+06	0	692938	0	1.97184e+06	878536
Q8BL66	Eea1	183000000	183000000	187000000	192000000	91800000	128000000
Q8BL80	Arhgap22	2.3938e+06	2.09169e+06	1.73335e+06	1.93048e+06	2395385	3754114
Q8BL97-2	Srsf7	8794146	7480785	10700000	6.31822e+06	12000000	6357844
Q8BLR5	Psd4	1.10192e+06	594577	737574	0	698353	989815
Q8BMA6	Srp68	1.92277e+06	2522793	1.80351e+06	1.76379e+06	1.92915e+06	2005169
Q8BMC4	Nop9	0	0	0	0	0	0
Q8BMD8	Slc25a24	5.43972e+06	4.1909e+06	4198644	4.39212e+06	3.66159e+06	5.11338e+06
Q8BMF4	Dlat	1.62675e+06	2456766	3.05563e+06	6.591e+06	3.20137e+06	3.85354e+06
Q8BMG7	Rab3gap2	158330	0	201123	0	0	0
Q8BMJ2	Lars1	887747	623965	778467	0	1.06868e+06	1.35514e+06
Q8BMJ3	Eif1ax	46700000	28200000	44200000	37300000	86000000	42800000
Q8BMK4	Ckap4	2970876	3.90384e+06	3.9587e+06	5102336	3585440	4.09611e+06
Q8BML9	Qars1	2711862	3.47367e+06	2268798	2.76152e+06	2642858	2821636
Q8BMS1	Hadha	11500000	11300000	13000000	10300000	13100000	11600000
Q8BMS9	Rassf2	3.65147e+06	4.21877e+06	3049386	4717396	3.4375e+06	3.77147e+06
Q8BN21-2	Vrk2	1.89921e+06	1.49551e+06	1.57385e+06	766383	1026268	1.53882e+06
Q8BNQ3	Gpr137b	912191	1.09816e+06	632868	0	730679	1.1026e+06
Q8BNV1-2	Trmt2a	1.00258e+06	0	651192	0	807599	0
Q8BP47	NARS1	1210976	1.37475e+06	749521	1559968	1.92604e+06	1.5002e+06
Q8BP67	Rpl24	49900000	70300000	51000000	50800000	41500000	46500000
Q8BP92	Rcn2	3.74499e+06	4.09285e+06	2.87297e+06	3457603	4.1342e+06	3.5755e+06
Q8BPU7	Elmo1	2.73121e+06	2.95271e+06	2.45666e+06	3.46306e+06	3969853	3262999
Q8BQ30-2	Ppp1r18	2.79922e+06	2427676	2.31766e+06	2113160	2791169	3.13212e+06
Q8BQZ4	Ralgapb	0	640817	0	0	1.68418e+06	1.14746e+06
Q8BRF7-3	Scfd1	1.66939e+06	1676010	1.09457e+06	1.86604e+06	2.38048e+06	2555543
Q8BSY0	Asph	4854308	6.79225e+06	4.72215e+06	5.81686e+06	6846759	8567222
Q8BT07-2	Cep55	915122	1.32476e+06	600918	0	2.16256e+06	1.05624e+06
Q8BTI8-2	Srrm2	2.54417e+06	0	1.9865e+06	1.55972e+06	2.09984e+06	1.36266e+06
Q8BTI8	Srrm2	51900000	29400000	55100000	36000000	45500000	37200000
Q8BTM8	Flna	8.1494e+06	9089114	14400000	21200000	16000000	11600000
Q8BTU1	Cfap20	5898888	2.26679e+06	6995080	3028806	4.03783e+06	2241428
Q8BTV2-2	Cpsf7	1.21302e+06	1.30044e+06	608122	1.29178e+06	1222131	1.31483e+06
Q8BTY8-3	Scfd2	4238009	4.93899e+06	3.33196e+06	2.90865e+06	4306129	6983178
Q8BTY8	Scfd2	7539703	6945264	3.79586e+06	4144522	6358122	11100000
Q8BU14	Sec62	1.1304e+06	445731	593413	1.34325e+06	1.9185e+06	2161259
Q8BU30	Iars1	3047128	2.88286e+06	2.48019e+06	2.5025e+06	2.82312e+06	5.0884e+06
Q8BU31	Rap2c	12700000	7160888	7841798	7.82573e+06	11300000	11500000
Q8BU33	Ilvbl	1.49552e+06	1.08955e+06	1.28478e+06	1.18226e+06	2.39129e+06	1704158
Q8BU88	Mrpl22	1297272	1.19317e+06	1.40503e+06	1.01248e+06	2.43907e+06	1.10929e+06
Q8BUB4	Wdfy2	0	0	0	0	0	0
Q8BV49	Pyhin1	2.82081e+06	6.15527e+06	3.7047e+06	3.61054e+06	5382553	3093797
Q8BVE3	Atp6v1h	7436459	5713466	8439224	7589441	6076119	7.81189e+06
Q8BVI4	Qdpr	0	0	0	33400000	11100000	0
Q8BVK9	Sp110	2.67065e+06	1.9342e+06	2.1055e+06	2.10958e+06	4.16551e+06	2.79186e+06
Q8BVL3	Snx17	5281983	5244761	3647492	5.65534e+06	3.62289e+06	6.15098e+06
Q8BVW3	Trim14	1.0417e+06	788745	860349	708532	1.03322e+06	789435
Q8BVY0	Rsl1d1	4.16695e+06	1.02078e+06	1.61002e+06	1.20532e+06	1.56769e+06	7086262
Q8BW10	Nob1	4.84663e+06	4176194	4489590	3.16637e+06	4.71957e+06	2.80366e+06
Q8BW75	Maob	0	0	0	0	0	0
Q8BWG8-2	Arrb1	0	0	932331	2415495	0	0
Q8BWQ1	Ugt2a3	0	0	0	0	0	0
Q8BWQ6-2	Vps35l	2.06552e+06	2.32619e+06	1.31429e+06	1.52428e+06	1.61717e+06	2.0907e+06
Q8BWT1	Acaa2	7.61054e+06	7476365	8493173	12600000	7596012	10600000
Q8BWU5	Osgep	1.01829e+06	0	0	0	0	0
Q8BWW4	Larp4	389355	0	0	0	0	416187
Q8BWY3	Etf1	1.88468e+06	1.99022e+06	1.90096e+06	2.42242e+06	3.22024e+06	2.65945e+06
Q8BX02-2	Kank2	0	0	0	0	0	0
Q8BX10-2	Pgam5	14900000	12100000	12300000	9304786	10800000	18600000
Q8BX17	Gemin5	0	0	0	0	0	95131.1
Q8BX57	Pxk	1676093	1612108	1.11646e+06	1.23782e+06	2724316	1.52445e+06
Q8BX70	Vps13c	1.88121e+06	1.83841e+06	1.5896e+06	1.70169e+06	2.01337e+06	1.82661e+06
Q8BXC6	Commd2	0	0	2807631	3.96775e+06	2.54817e+06	2.16005e+06
Q8BXK9	Clic5	693620	0	11700000	30900000	3.75201e+06	0
Q8BXN9-2	Tmem87a	0	0	0	0	0	0
Q8BXZ1	Tmx3	3019486	0	969073	2.06657e+06	807179	1.42407e+06
Q8BY89-2	Slc44a2	0	0	619094	2.564e+06	0	0
Q8BYA0	Tbcd	0	0	0	0	0	0
Q8BYC6	Taok3	4.01786e+06	2.8205e+06	5216371	3.4773e+06	5.3677e+06	3.21944e+06
Q8BYH8	Chd9	1.38227e+06	1.24319e+06	1.3602e+06	951461	1.27895e+06	985464
Q8BYW1-2	Arhgap25	1.0804e+06	1.09683e+06	932635	1.22714e+06	1.25508e+06	2.1272e+06
Q8BZ20	Parp12	0	441469	509432	593803	778523	761431
Q8BZ98-2	Dnm3	2.50027e+06	1.6575e+06	3.3131e+06	1641741	1.7761e+06	2.70816e+06
Q8BZN6-2	Dock10	2214616	1.31814e+06	2.09245e+06	1.79218e+06	2.10517e+06	1.64063e+06
Q8BZX4-2	Srek1	4.01429e+06	1.08509e+06	3.24834e+06	1274701	3.95315e+06	1.51804e+06
Q8C050-2	Rps6ka5	847962	1.18233e+06	1.56966e+06	948465	1.20266e+06	1.97375e+06
Q8C052	Map1s	6.14521e+06	7812285	5.59705e+06	6.80283e+06	7521383	7.60723e+06
Q8C079	Strip1	583927	189095	1.10798e+06	3797546	760232	950262
Q8C092	Taf5	1.00593e+06	0	1.52447e+06	0	1.13493e+06	999537
Q8C0C7	Farsa	16200000	16700000	17300000	15500000	16600000	18200000
Q8C0D4	Arhgap12	7.8784e+06	6.14876e+06	5557214	6545629	7.80903e+06	6994430
Q8C0E2	Vps26b	655039	760846	371282	941188	1.09358e+06	738402
Q8C0E3-2	Trim47	4.03124e+06	17300000	2.06152e+06	2399643	1.82067e+06	2.75741e+06
Q8C147	Dock8	2.63254e+06	1.7778e+06	2.15622e+06	2.27695e+06	1994746	2.59686e+06
Q8C181-2	Mbnl2	0	0	0	0	0	0
Q8C196	Cps1	3995480	4230578	1166628	3054665	3012935	1.79527e+06
Q8C1B1-2	Camsap2	1.52627e+06	2.59782e+06	961928	1.54619e+06	1.4825e+06	3044598
Q8C1B7-2	Septin11	545785	0	573106	773094	733473	1115935
Q8C1D8	Iws1	2.05627e+06	0	1421739	1.35513e+06	0	0
Q8C1E7	Tmem120a	768432	0	518603	663650	1.58677e+06	1.49367e+06
Q8C1S0	Med19	16700000	5766943	20800000	12800000	36100000	8602849
Q8C2E7	Washc5	0	0	0	0	0	0
Q8C2Q3	Rbm14	11300000	18100000	9883018	16800000	15000000	18600000
Q8C3J5	Dock2	4.87968e+06	4137209	4429023	3.37805e+06	5.56945e+06	4.13035e+06
Q8C3X8	Lmf2	863480	0	760992	1.35538e+06	1.13683e+06	1.12199e+06
Q8C4J7	Tbl3	0	0	0	0	0	0
Q8C522	Endod1	1.24054e+06	1.05972e+06	2.06365e+06	1.82668e+06	1.67466e+06	1.47397e+06
Q8C5L3-2	Cnot2	2291992	1.7538e+06	1.92789e+06	1.30229e+06	1.76775e+06	1.70098e+06
Q8C5N3-2	Cwc22	975091	1.05817e+06	900278	789806	794943	601925
Q8C5P5-2	Nt5dc1	140837	1.03661e+06	923105	0	0	0
Q8C6B9	Rps19bp1	2187193	1.7163e+06	1.86474e+06	2.21248e+06	2.42882e+06	1.59664e+06
Q8C754	Vps52	1.05396e+06	1.06722e+06	1.57512e+06	1.05107e+06	268484	936273
Q8C7D2-3	Crbn	1.39951e+06	1.15313e+06	1.0612e+06	1.13473e+06	609878	1.03387e+06
Q8C7V3	Utp15	0	0	0	0	0	0
Q8C7X2-2	Emc1	1.28184e+06	1.44718e+06	1650321	1.77953e+06	1.91389e+06	2.02659e+06
Q8C804	Spice1	1.23644e+06	799474	1.39138e+06	1.37196e+06	2.0796e+06	1.72055e+06
Q8C854-3	Myef2	692835	848070	1.04534e+06	0	0	860541
Q8C863	Itch	1.87794e+06	2.19268e+06	1.23258e+06	1578508	1.89632e+06	2.49725e+06
Q8C8U0-3	Ppfibp1	1.62788e+06	4880162	1.03434e+06	1.35154e+06	1.75594e+06	2.11915e+06
Q8CAQ8-2	Immt	4.16473e+06	4.70227e+06	4.31615e+06	4610624	3.70288e+06	3.81958e+06
Q8CAQ8-3	Immt	17000000	4705447	1.48172e+06	2.65603e+06	6322686	2909582
Q8CAS9-2	Parp9	377092	658420	0	596654	1193808	917737
Q8CAY6	Acat2	0	0	843977	802165	0	1.02194e+06
Q8CB77	Eloa	8696425	6.37195e+06	8711570	4.95873e+06	9074679	6149136
Q8CB96-2	Rassf4	885949	822958	798519	781651	1.74244e+06	1.26025e+06
Q8CBA2	Slfn5	1.82445e+06	2145570	661908	945374	1.26886e+06	1.21146e+06
Q8CBE3	Wdr37	1.88368e+06	1.76218e+06	1.38363e+06	1.67076e+06	1609167	1.88199e+06
Q8CBW3-2	Abi1	3.72642e+06	4.92495e+06	3.67651e+06	4209491	4.94557e+06	7.47411e+06
Q8CC88	Vwa8	1.15951e+06	2.71866e+06	1.52258e+06	0	2.31264e+06	4.76647e+06
Q8CCF0	Prpf31	1.03135e+06	1.54646e+06	1.07525e+06	1.30681e+06	1298087	1.07534e+06
Q8CCJ9	Phf20l1	1.07385e+06	621525	870546	658928	1.0409e+06	816780
Q8CCK0	Macroh2a2	0	0	783450	3.13173e+06	0	0
Q8CCP0	Nemf	2.59787e+06	1991809	2.7673e+06	1.89985e+06	3.58951e+06	2284071
Q8CCS6-2	Pabpn1	951330	928529	921450	1.87412e+06	960918	1.88416e+06
Q8CD26	Slc35e1	1.69797e+06	1.35233e+06	1.77546e+06	2.20857e+06	0	2.8517e+06
Q8CD92-2	Ttc27	681962	1.03706e+06	511819	0	780218	970836
Q8CDG3-2	Vcpip1	1.20787e+06	1.43803e+06	1.33276e+06	1732549	0	1.95424e+06
Q8CF66	Lamtor4	3.90827e+06	2855610	4464153	3.77039e+06	4.14857e+06	7820461
Q8CFD4	Snx8	571420	716738	547635	0	1.11709e+06	555373
Q8CFI7	Polr2b	1.26724e+06	959496	1.79211e+06	1.83477e+06	2.08296e+06	2068815
Q8CFJ7	Slc25a45	2.36546e+06	1.08649e+06	1.5354e+06	1.13671e+06	1.13848e+06	1.56341e+06
Q8CFQ3	Aqr	0	0	0	0	0	0
Q8CG47	Smc4	865885	1.10378e+06	706812	429992	985313	1054344
Q8CG48	Smc2	950988	1.08487e+06	767923	681450	736115	1.1629e+06
Q8CGA0	Ppm1f	557615	0	0	1.71865e+06	807363	980478
Q8CGA3	Slc43a2	731269	1301088	1.81951e+06	2.5686e+06	0	0
Q8CGC6	Rbm28	0	0	0	0	0	0
Q8CGC7	Eprs1	3.29024e+06	3304701	3.41091e+06	3634020	3.19507e+06	3.46994e+06
Q8CGK3	Lonp1	951065	1.59e+06	1.38809e+06	1.5897e+06	1.43902e+06	1.875e+06
Q8CGP2-2	Hist1h2bp	0	0	0	0	0	0
Q8CGP5	Hist1h2af	49700000	89300000	63100000	50200000	112000000	53300000
Q8CGP7	H2ac15	5.15213e+06	6623511	21400000	15800000	7670126	2.21131e+06
Q8CGZ0	Cherp	11600000	4.01686e+06	10500000	4982746	6795256	5.00148e+06
Q8CH18-3	Ccar1	0	0	0	0	0	0
Q8CH25-2	Sltm	1.23277e+06	2.66332e+06	1.90551e+06	1170576	1.95111e+06	1.89897e+06
Q8CHH9-2	Septin8	528955	0	990940	1.94482e+06	952648	462252
Q8CHT0	Aldh4a1	0	0	0	0	0	0
Q8CHY6	Gatad2a	2038335	1.24811e+06	1.80953e+06	1.53822e+06	1.91866e+06	2.11588e+06
Q8CI51	Pdlim5	1.59872e+06	1.56231e+06	2166540	3.21939e+06	3.66721e+06	2.31185e+06
Q8CI59-2	Steap3	944181	1.11663e+06	1.13917e+06	1.60273e+06	0	1018236
Q8CI94	Pygb	3.47587e+06	3.3423e+06	3.56383e+06	3.45254e+06	3.21171e+06	4321708
Q8CI95	Osbpl11	2.7993e+06	3.34244e+06	1.89011e+06	2.48195e+06	2.29859e+06	3925297
Q8CIB5	Fermt2	0	0	1.60188e+06	4.86158e+06	0	0
Q8CIE6	Copa	11600000	12800000	11400000	13000000	13800000	13300000
Q8CIH5	Plcg2	3.57598e+06	3.16361e+06	3729904	3.02184e+06	4447134	3.66873e+06
Q8CIZ8	Vwf	0	0	903470	2.46152e+06	733272	0
Q8CJG0	Ago2	1.53533e+06	2.30531e+06	1228524	1.57873e+06	1.60748e+06	2.88209e+06
Q8CJG1	Ago1	0	1.84608e+06	382761	0	1568952	1.37239e+06
Q8JZM7	Cdc73	251379	459377	768992	749708	1.13952e+06	609057
Q8JZN7	Rhot2	0	0	0	0	0	0
Q8JZQ2	Afg3l2	1.67286e+06	0	798713	1.84707e+06	1.31236e+06	1.35575e+06
Q8JZQ9	Eif3b	1.61632e+06	3.36582e+06	1.31864e+06	1.5755e+06	1.39761e+06	1274503
Q8JZR0	Acsl5	3.84445e+06	5479171	6084577	5.60946e+06	4.58632e+06	7.92335e+06
Q8JZU2	Slc25a1	6748519	6343570	5175769	4.97236e+06	3.50701e+06	5168036
Q8JZX4	Rbm17	18800000	8.33218e+06	17300000	10100000	15000000	12300000
Q8K003	Tma7	181368	0	0	1.71019e+06	0	0
Q8K019-2	Bclaf1	1992230	1.43213e+06	3.55181e+06	1.88014e+06	2.47975e+06	2.33845e+06
Q8K0C9	Gmds	0	0	870810	1.31687e+06	0	0
Q8K0D5	Gfm1	0	0	0	0	0	0
Q8K0E8	Fgb	0	836014	0	488289	673169	619723
Q8K0Q5	Arhgap18	1.54657e+06	1.6904e+06	1.43697e+06	878822	2.31005e+06	1.26801e+06
Q8K0V4	Cnot3	997133	1.29921e+06	0	0	1.3665e+06	873728
Q8K124	Plekho2	946773	0	1.05356e+06	1.58845e+06	2.06412e+06	1624369
Q8K194	Snrnp27	17800000	11800000	18000000	8817783	17700000	6.62898e+06
Q8K1A6	Cc2d1a	0	0	0	0	0	0
Q8K1B8	Fermt3	39300000	34400000	36200000	33700000	34200000	44600000
Q8K1E0-2	Stx5	674731	983138	1.05351e+06	1.54985e+06	1.45522e+06	1.46325e+06
Q8K1I7	Wipf1	759566	1.26202e+06	596395	1.72874e+06	2168166	1355087
Q8K1M6-2	Dnm1l	1.03116e+06	1.2589e+06	1384361	1.86616e+06	1.25286e+06	1.40981e+06
Q8K1R7	Nek9	80200000	86400000	51600000	59900000	60900000	123000000
Q8K1T1	Lrrc25	1.98324e+06	2.46997e+06	1913379	1.55274e+06	3.31185e+06	2.43607e+06
Q8K1X1	Wdr11	0	0	0	0	0	327799
Q8K1X4	Nckap1l	21800000	23600000	21800000	21300000	18300000	18000000
Q8K212	Pacs1	0	704261	284560	588754	643655	0
Q8K224	Nat10	1465498	1.26171e+06	1746264	983303	2443904	1.17442e+06
Q8K268	Abcf3	2.66701e+06	1.92751e+06	1.64589e+06	1.96469e+06	2151919	3.05446e+06
Q8K296-2	Mtmr3	1221893	1.38651e+06	923526	1351791	1.24205e+06	2.36564e+06
Q8K297	Colgalt1	1.83396e+06	2199983	1.62793e+06	2.02058e+06	2.22949e+06	2.55302e+06
Q8K2B3	Sdha	2.64129e+06	2.39689e+06	3.41122e+06	1.62939e+06	2837172	2.45343e+06
Q8K2C9	Hacd3	778623	744519	951669	1.07427e+06	896235	0
Q8K2F0-2	Brd3	385966	787942	614894	531864	2.37443e+06	1.54747e+06
Q8K2F8	Lsm14a	892013	2.5818e+06	919857	1.84704e+06	1.9881e+06	3252170
Q8K2H2	Otud6b	0	0	0	0	0	0
Q8K2I3	Fmo2	399027	296371	4878897	13700000	1.79016e+06	398927
Q8K2K6-1	Agfg1	6.59324e+06	5703619	4.28675e+06	4661836	7.04333e+06	8547260
Q8K2M0-2	Mrpl38	736579	735014	721476	0	637354	701251
Q8K310	Matr3	1.20872e+06	2.1726e+06	1.88642e+06	2.13098e+06	2027624	2529427
Q8K330-2	Ssh3	988866	820423	894038	1.06933e+06	1.34199e+06	805484
Q8K363	Ddx18	3.67924e+06	3.59957e+06	4.95406e+06	6554756	5418530	3.51387e+06
Q8K382	Dennd1a	2.39453e+06	2.22954e+06	1.27498e+06	1.81318e+06	1752919	3.8675e+06
Q8K396	Mnd1	0	0	3.34912e+06	2.30919e+06	4733307	0
Q8K3G5	Vrk3	221857	870134	373175	0	291818	0
Q8K3J1	Ndufs8	1.6408e+06	1370106	2.19524e+06	1.59611e+06	880458	1.13797e+06
Q8K3W0-1	Babam2	1.75361e+06	1.43065e+06	2.01566e+06	1.61132e+06	1.42189e+06	1.46764e+06
Q8K400-2	Stxbp5	1.23897e+06	938650	829726	887813	1.31165e+06	1.23105e+06
Q8K4I3	Arhgef6	4.51041e+06	5407912	3.6028e+06	4286757	5.08449e+06	5.3459e+06
Q8K4L0	Ddx54	0	0	0	0	0	0
Q8K4P0	Wdr33	1.26679e+06	796837	1.26906e+06	1.08324e+06	928224	2.68139e+06
Q8K4R9-2	Dlgap5	12400000	9134539	7.44093e+06	8488444	8.35589e+06	7.35707e+06
Q8K4Z5	Sf3a1	845000	0	877245	1.00778e+06	0	1.08898e+06
Q8QZR5	Gpt	493520	0	734845	0	1.41119e+06	509507
Q8QZT1	Acat1	4.93941e+06	5.31042e+06	7.18785e+06	10100000	6944362	5586034
Q8QZY1	Eif3l	999418	839039	780639	1.40498e+06	954274	870012
Q8QZY9	Sf3b4	237603	0	974302	794731	0	0
Q8R001-2	Mapre2	386832	0	354199	396153	268087	394560
Q8R010	Aimp2	1.47653e+06	2.46872e+06	942370	1.42239e+06	1.10354e+06	1312152
Q8R016	Blmh	0	0	0	0	0	0
Q8R050-2	Gspt1	1.59161e+06	975153	1.44809e+06	2.20646e+06	2754769	1298548
Q8R0A0	Gtf2f2	4731485	3.35175e+06	6164140	3.11479e+06	7.15927e+06	3.43446e+06
Q8R0F5	Rbmx2	3.10451e+06	1.47756e+06	4.16142e+06	1.8847e+06	3.77528e+06	1.72569e+06
Q8R0G7	Spns1	3.66725e+06	3.47632e+06	2.83399e+06	3.73942e+06	2.02869e+06	6.67424e+06
Q8R0G9	Nup133	835079	0	645280	940098	0	1.28353e+06
Q8R0K4	Ccdc137	2122990	1.41853e+06	536148	1081121	923635	739238
Q8R0W0	Eppk1	0	11400000	1.39552e+06	420802	0	0
Q8R0X7	Sgpl1	12800000	9555899	9906051	11500000	10800000	13400000
Q8R0Y6	Aldh1l1	0	0	396583	913397	0	0
Q8R149	Bud13	4927755	2.18703e+06	6522182	3.4427e+06	7.41202e+06	3233871
Q8R151	Znfx1	0	0	0	314052	0	511022
Q8R164	Bphl	3.40496e+06	2.98648e+06	3.7804e+06	3.84754e+06	3.13129e+06	3.53825e+06
Q8R1A4-2	Dock7	2.60454e+06	2220372	1.76413e+06	2.30526e+06	2.88723e+06	3.76116e+06
Q8R1B4	Eif3c	8510140	7600351	9659055	8346236	11500000	7274111
Q8R1F0	D8Ertd738e	12700000	13500000	10400000	10500000	13500000	13100000
Q8R1F1	Niban2	1.34274e+06	1.58664e+06	1.84702e+06	3.01231e+06	1.70154e+06	1704585
Q8R1G6	Pdlim2	897252	1.07244e+06	758746	1.99382e+06	849606	1.09137e+06
Q8R1I1	Uqcr10	4.10296e+06	2.57071e+06	3.69226e+06	2.70724e+06	3.7966e+06	4.93771e+06
Q8R1J3	Zcchc9	2.41654e+06	930529	2.01752e+06	1.69383e+06	2.1151e+06	1.18211e+06
Q8R1Q8	Dync1li1	3.79284e+06	2.6069e+06	5191098	3.018e+06	5.04822e+06	3.59721e+06
Q8R1S4-2	Mtss1	2.22536e+06	2.34802e+06	2679257	1.80891e+06	2.597e+06	2.30515e+06
Q8R2M2	Dnttip2	10700000	8128823	11000000	7019961	10000000	6705043
Q8R2Y2-2	Mcam	0	0	1.02285e+06	2.35148e+06	0	0
Q8R307	Vps18	478320	578006	476430	812737	597518	723152
Q8R317-2	Ubqln1	0	0	0	588059	684828	0
Q8R326-2	Pspc1	0	535484	682984	1.01797e+06	446633	0
Q8R3B1	Plcd1	0	0	0	0	0	0
Q8R3G9	Tspan8	0	0	1.89504e+06	4782135	1.06066e+06	0
Q8R3L2-2	Tcf25	448882	0	0	0	0	765402
Q8R3N1	Nop14	6.94175e+06	3.99673e+06	7964574	4.00483e+06	6.80883e+06	3126012
Q8R3N6	Thoc1	0	0	0	0	0	0
Q8R409	Hexim1	1.41679e+06	0	1.8236e+06	669738	2.36194e+06	1.25782e+06
Q8R480	Nup85	0	0	0	22300000	16800000	0
Q8R4B8-2	Nlrp3	842082	1.085e+06	0	669283	871172	896006
Q8R4U7	Luzp1	389877	521146	287850	0	681838	0
Q8R574	Prpsap2	612696	0	680294	838416	747719	1.21162e+06
Q8R5A3	Apbb1ip	2.01288e+06	0	0	1.55797e+06	0	0
Q8R5G7-2	Arap3	0	0	0	0	0	0
Q8R5L3-2	Vps39	797865	1.10332e+06	468925	680120	1.1109e+06	1.02135e+06
Q8VBT6	Apobr	1.93073e+06	1774384	915654	1.54915e+06	2190596	3906251
Q8VBW5-2	Bbx	1.30553e+06	0	3251268	0	2016048	0
Q8VC31	Ccdc9	512093	634109	0	0	567035	0
Q8VCB1	Ndc1	1.40298e+06	816148	1.1578e+06	2.26608e+06	1.75025e+06	2.11313e+06
Q8VCC1	Hpgd	0	0	676956	2.37972e+06	0	0
Q8VCH6	Dhcr24	344470	762372	395666	0	0	0
Q8VCM7	Fgg	159580	0	253606	1.04474e+06	135091	0
Q8VCM8	Ncln	2586457	2.45216e+06	2.08924e+06	2637495	2.78168e+06	2.75526e+06
Q8VCT3	Rnpep	7697040	7265136	8042120	6.92783e+06	7522919	8.08121e+06
Q8VCT4	Ces1d	2.32883e+06	3.52234e+06	6546487	23600000	3.25299e+06	2.61249e+06
Q8VCT9	Tesk2	0	0	0	0	0	0
Q8VCW2	Krt25	0	0	0	0	0	0
Q8VCW8	Acsf2	0	0	752103	1.72937e+06	0	0
Q8VD65	Pik3r4	1.14944e+06	1.40481e+06	1612557	1.84497e+06	2245697	1.74036e+06
Q8VDD5	Myh9	6571844	7.54751e+06	17600000	31500000	11100000	6.46352e+06
Q8VDD8	Washc1	1.7612e+06	1.77712e+06	1.38185e+06	1068440	1.63514e+06	2141066
Q8VDF2-2	Uhrf1	0	0	0	0	0	0
Q8VDI1	Epsti1	752339	1.68363e+06	866345	688398	852717	486189
Q8VDJ3	Hdlbp	529412	442584	1.20601e+06	1.333e+06	1.10321e+06	645281
Q8VDM4	Psmd2	1.3393e+06	1.88572e+06	1.96344e+06	2.67491e+06	1.82116e+06	1.81942e+06
Q8VDM6-2	Hnrnpul1	1.65644e+06	1.59749e+06	564416	1523847	2546500	726296
Q8VDN2	Atp1a1	16500000	16300000	17700000	17100000	16700000	18300000
Q8VDP2-2	Steep1	2.23357e+06	1.13805e+06	2.49336e+06	1.15522e+06	1767692	1.29955e+06
Q8VDP3-2	Mical1	762478	815744	461776	934859	768031	486348
Q8VDP4	Ccar2	446516	677152	647996	1.09111e+06	871101	1.0559e+06
Q8VDP6	Cdipt	1.25276e+06	1.13619e+06	1082587	1.36662e+06	0	1.479e+06
Q8VDQ9	Kri1	5.91196e+06	4008108	7.17893e+06	2.89358e+06	4.69994e+06	3.62246e+06
Q8VDT9	Mrpl50	137000000	0	10900000	8269786	16500000	18600000
Q8VDW0	Ddx39a	5.95445e+06	6.47335e+06	7.71869e+06	9081625	6.90291e+06	8776678
Q8VE10	Naa40	309370	0	274648	0	320626	0
Q8VE11-2	Mtmr6	854099	0	701006	0	1.44692e+06	1.21146e+06
Q8VE22	Mrps23	0	357715	432856	874056	900464	787075
Q8VE37	Rcc1	0	0	0	0	0	0
Q8VE65	Taf12	543632	233833	0	0	516248	482017
Q8VE70	Pdcd10	1.60406e+06	2.06543e+06	1.41555e+06	3.24009e+06	1.86762e+06	2558899
Q8VE97	Srsf4	5429732	3.85674e+06	6172558	3.9817e+06	6538926	4035600
Q8VED5	Krt79	0	0	1.13631e+06	733083	0	0
Q8VEH3	Arl8a	2.30967e+06	1.96769e+06	3.16947e+06	3510100	2.59273e+06	2.89176e+06
Q8VEJ9	Vps4a	1181551	1820317	965895	2238393	2.05971e+06	1029424
Q8VEK3-2	Hnrnpu	8716413	16000000	13700000	14400000	14300000	16900000
Q8VEM8	Slc25a3	11900000	9374934	13900000	13500000	7486565	11200000
Q8VH51-2	Rbm39	22900000	11600000	32000000	16000000	27900000	12800000
Q8VHR5	Gatad2b	8710670	0	0	0	10400000	0
Q8VHX6-2	Flnc	391239	467868	97561.9	0	0	0
Q8VHZ7	Imp4	0	0	0	0	0	0
Q8VI33	Taf9	1.18678e+06	161190	867850	0	494222	0
Q8VI36-2	Pxn	716094	1.07209e+06	1230716	2.2933e+06	1.3626e+06	1100165
Q8VI93	Oas3	8872240	7.24279e+06	8.21555e+06	7.57108e+06	8683618	8.23084e+06
Q8VIJ6	Sfpq	3800715	6.69436e+06	5.2435e+06	7.61605e+06	6.65685e+06	7.12048e+06
Q91V12-2	Acot7	1.16849e+06	1.6952e+06	1.4354e+06	1.51867e+06	2.18769e+06	972495
Q91V41	Rab14	1.95525e+06	1.59054e+06	2.56713e+06	4935654	2970881	1.88945e+06
Q91V61-2	Sfxn3	14100000	12800000	12300000	12600000	10400000	15300000
Q91V81	Rbm42	2.32936e+06	2.70771e+06	2.05194e+06	1.68976e+06	2.95147e+06	2.15985e+06
Q91V88-2	Npnt	0	0	2718397	9072126	1293617	0
Q91V92	Acly	8232175	9154556	7.81309e+06	7970657	7.48513e+06	10200000
Q91VC3	Eif4a3	0	737938	1.08128e+06	1.42432e+06	1629887	2.805e+06
Q91VC4	Plvap	0	0	1.71132e+06	4613038	443210	0
Q91VC7	Ppp1r14a	0	0	574535	1.62942e+06	0	0
Q91VD9	Ndufs1	4867295	4.72839e+06	4.23418e+06	3467194	3825749	4.32334e+06
Q91VE0	Slc27a4	1.99785e+06	2180795	2.0227e+06	1.71098e+06	1.9541e+06	2.65229e+06
Q91VE6-2	Nifk	762659	478376	0	891331	1.52924e+06	1.13553e+06
Q91VF2	Hnmt	606056	0	0	0	0	0
Q91VH2	Snx9	1280000000	1200000000	1200000000	1350000000	1270000000	1470000000
Q91VH6	Memo1	2.82654e+06	2.78223e+06	2.56583e+06	2.62799e+06	2.82138e+06	3.74211e+06
Q91VI7	Rnh1	18200000	13100000	14900000	14100000	18400000	17400000
Q91VJ4	Stk38	841489	1185100	1.10875e+06	1.08061e+06	778393	914791
Q91VJ5	Pqbp1	5.52928e+06	6.68487e+06	4.30316e+06	3610720	8.3082e+06	4.87384e+06
Q91VM5	Rbmxl1	1140896	2.36142e+06	1316812	684077	874298	1.73109e+06
Q91VN4	Chchd6	687593	1.21153e+06	791255	449572	1.2324e+06	0
Q91VN6	Ddx41	4.33571e+06	2856821	5.59116e+06	2.53139e+06	4.25255e+06	3653133
Q91VR5	Ddx1	3.51703e+06	6.29263e+06	3977511	4.03275e+06	4.8475e+06	5.2701e+06
Q91VR8	Brk1	1.25892e+06	1.92231e+06	868465	1.00815e+06	1.9334e+06	2.20092e+06
Q91VS7	Mgst1	3.48748e+06	0	2986085	4979030	2.86064e+06	3.05174e+06
Q91VT4	Cbr4	0	0	0	0	1.49687e+06	0
Q91VU6-2	Dcaf11	0	619736	2.5788e+06	0	0	0
Q91VW3	Sh3bgrl3	131584	0	1.02765e+06	2.32392e+06	569128	0
Q91W39	Ncoa5	0	0	0	0	0	0
Q91W50	Csde1	441234	0	561657	856459	181179	319341
Q91W86	Vps11	977328	990921	1.41763e+06	1.51027e+06	3.51895e+06	938186
Q91W90	Txndc5	0	0	687242	1.01556e+06	0	0
Q91WB4	Plekhf2	1.05309e+06	1301637	1.4409e+06	1.24687e+06	1.55601e+06	1.7199e+06
Q91WC9	Daglb	1.19639e+06	506047	506914	701506	0	0
Q91WD5	Ndufs2	1.37719e+06	0	1.11181e+06	0	810682	1.48614e+06
Q91WF7	Fig4	1.68997e+06	1.04959e+06	954640	1.22356e+06	1.47574e+06	1.1199e+06
Q91WK2	Eif3h	0	0	0	0	0	0
Q91WM3	Rrp9	645121	0	383558	0	0	0
Q91WN1	Dnajc9	1.2267e+06	7690129	1396903	944405	1.44265e+06	2175081
Q91WR3-2	Ascc2	0	0	0	0	0	0
Q91WS0	Cisd1	0	0	834790	2.57317e+06	0	336160
Q91X51	Gorasp1	0	0	367742	1.00578e+06	0	0
Q91X72	Hpx	1.79935e+06	2.31911e+06	1.12795e+06	1548663	1.77634e+06	2.11688e+06
Q91X78	Erlin1	5.78315e+06	4.88922e+06	4498831	6.2883e+06	4759067	3.73397e+06
Q91X83	Mat1a	0	0	0	0	0	0
Q91X84	Crtc3	2.72682e+06	4.07306e+06	1.93627e+06	2.66265e+06	2.49928e+06	6.12592e+06
Q91XB0	Trex1	818258	1.45668e+06	834010	1.40093e+06	1.24078e+06	0
Q91XD6	Vps36	999589	1.36073e+06	1.17031e+06	1.47141e+06	1.52871e+06	970982
Q91XU3	Pip4k2c	14100000	18900000	9456309	11800000	15300000	28600000
Q91Y97	Aldob	10400000	3.96978e+06	8610190	13300000	16100000	10500000
Q91YH5-2	Atl3	701489	853066	966683	1.83904e+06	920543	1.01945e+06
Q91YJ2	Snx4	750526	649005	581091	653618	1.44875e+06	783255
Q91YK2	Rrp1b	0	0	0	0	0	0
Q91YL3	Uckl1	0	2.17937e+06	1.99744e+06	1.5402e+06	1.44602e+06	1.84186e+06
Q91YP3	Dera	2662084	3.08313e+06	2.17361e+06	2.49494e+06	3.25377e+06	3.77481e+06
Q91YQ1	Rab29	702033	746039	746199	0	1.09064e+06	1.33685e+06
Q91YQ5	Rpn1	5246789	5.1186e+06	6.3817e+06	8.08799e+06	5.25218e+06	5.83274e+06
Q91YR5	Mettl13	1.41656e+06	1.48452e+06	549199	1.05899e+06	2.03532e+06	2.84969e+06
Q91YR7	Prpf6	1.94098e+06	1.78767e+06	1.81668e+06	1.90324e+06	1.8763e+06	1.87245e+06
Q91YR9	Ptgr1	0	0	429760	1.33303e+06	0	0
Q91YT0	Ndufv1	991324	1.21134e+06	1.07405e+06	827802	608709	1.07443e+06
Q91YT7	Ythdf2	0	0	0	880353	591953	0
Q91YU8	Ppan	1.29058e+06	1.41483e+06	0	0	0	0
Q91Z49-2	Fyttd1	0	0	0	0	0	0
Q91Z67	Srgap2	608289	0	817555	1.09925e+06	1.31901e+06	732592
Q91Z96	Bmp2k	1.97752e+06	2.32971e+06	1.68316e+06	2.48228e+06	1.69061e+06	1.87377e+06
Q91ZA3	Pcca	2025740	2.37182e+06	1.41237e+06	2513767	2.37296e+06	4.05506e+06
Q91ZE0	Tmlhe	740878	1345320	680426	795483	1.14105e+06	790053
Q91ZJ5-2	Ugp2	0	0	0	0	0	0
Q91ZP3-2	Lpin1	1.3745e+06	2.00078e+06	1.01661e+06	1517528	1.33433e+06	2.34161e+06
Q91ZW3	Smarca5	757744	1.32158e+06	848992	854316	1.23465e+06	751544
Q91ZX7	Lrp1	1860402	2.60687e+06	1.88546e+06	2.6419e+06	2.92179e+06	2625939
Q920B9	Supt16h	5589586	5.80297e+06	6.35995e+06	4.75093e+06	7605593	4566231
Q920E5	Fdps	1.21027e+06	0	1.26382e+06	802603	1.16242e+06	1.37164e+06
Q920I9-2	Wdr7	479131	0	209223	0	0	0
Q920L1	Fads1	1.00497e+06	0	756587	0	888220	674258
Q921E2	Rab31	1.28576e+06	1.53073e+06	920306	989350	989117	1.38117e+06
Q921F2	Tardbp	11700000	21200000	11300000	13100000	10200000	33000000
Q921F4	Hnrnpll	825781	0	927533	1.61781e+06	1185265	1.23772e+06
Q921G6	Lrch4	0	0	690218	0	6017834	1.20305e+06
Q921G7	Etfdh	0	0	368376	865467	0	0
Q921H8	Acaa1a	1.70552e+06	1.94331e+06	2.16269e+06	2.24449e+06	2.20174e+06	2.21651e+06
Q921I1	Tf	1.10216e+06	8044241	4.13151e+06	13600000	2.15217e+06	2060935
Q921I9	Exosc4	0	0	0	0	0	0
Q921J2	Rheb	765729	0	0	0	824789	1.34196e+06
Q921L3	Tmco1	1.67559e+06	1917290	1565553	1.29172e+06	1.36684e+06	1.57948e+06
Q921M3-2	Sf3b3	408922	889798	761975	1.04539e+06	0	839839
Q921M7	Cyrib	0	150089	561434	1.08683e+06	680556	0
Q921N6	Ddx27	2.73261e+06	2.23992e+06	3117093	2.23474e+06	3.79247e+06	2178127
Q921T2-2	Tor1aip1	3.17423e+06	2.58645e+06	3.66466e+06	2.83338e+06	4.14123e+06	3903050
Q921W4	Cryzl1	1.75386e+06	1.91476e+06	4284688	1.41388e+06	3.04672e+06	2416877
Q922B2	Dars1	2830414	3.91932e+06	3.00665e+06	3.2028e+06	2.66461e+06	2831469
Q922B9-3	Itprid2	1.32065e+06	0	305923	0	884444	0
Q922D8	Mthfd1	2.29436e+06	2.51149e+06	2.73445e+06	3255542	2.46836e+06	2.50124e+06
Q922F4	Tubb6	8933644	8821207	7190762	7514596	7.48427e+06	9963259
Q922G2-2	Fam76a	694805	968895	1.09256e+06	749406	0	1.06894e+06
Q922J9-2	Far1	0	1.35881e+06	1.92018e+06	0	0	901323
Q922P9	Glyr1	670188	1.09373e+06	1.46393e+06	1.01051e+06	1032772	1.2303e+06
Q922Q1	Mtarc2	0	1.57762e+06	688231	1.22903e+06	1.58168e+06	1.06634e+06
Q922Q2	Riok1	1.62781e+06	1.03949e+06	1.17462e+06	448502	1.91052e+06	1.5633e+06
Q922Q4	Pycr2	9316092	9911925	8.28849e+06	6.04181e+06	7408922	9095765
Q922Q8	Lrrc59	19000000	21700000	21100000	17300000	30000000	18800000
Q922R0	Prkx	799052	725549	825183	1369152	1.37659e+06	0
Q922R8	Pdia6	23700000	14300000	46100000	57800000	26200000	22300000
Q922U1	Prpf3	1.4426e+06	1.10113e+06	2.12607e+06	1.40186e+06	2.78896e+06	1.68042e+06
Q922U2	Krt5	4.40567e+06	1.56682e+06	5242645	1.76166e+06	2.88833e+06	723607
Q922V4	Plrg1	1.62445e+06	896662	3.02595e+06	1.69676e+06	3.23111e+06	0
Q923D2	Blvrb	0	649238	3.48764e+06	2.16881e+06	1.07411e+06	493979
Q923D4	Sf3b5	0	0	0	0	0	0
Q923D5	Wbp11	7424844	3.51616e+06	5556900	3440206	5694056	3.73091e+06
Q924A2-2	Cic	3397905	3740016	1.93534e+06	3499462	4.05181e+06	4.92559e+06
Q924A2	Cic	472388	0	0	0	0	0
Q924L1-2	Letmd1	0	0	0	0	0	0
Q924N4-2	Slc12a6	0	0	0	0	0	0
Q924Z4	Cers2	0	0	0	0	0	0
Q925F2	Esam	0	0	430228	1.19863e+06	0	0
Q925I1	Atad3	2610897	3118100	2909427	2595313	2977603	2.97511e+06
Q93092-2	Taldo1	498205	0	1.7863e+06	9728685	890855	0
Q99020	Hnrnpab	1.47648e+06	2321184	2.12266e+06	2335649	2.1065e+06	3.44081e+06
Q99J31	Ophn1	1.02747e+06	1.11487e+06	888002	1.09964e+06	969411	979201
Q99J47-2	Dhrs7b	511615	0	1.03412e+06	1386680	1.35892e+06	1.68001e+06
Q99J56	Derl1	2.18005e+06	3.64154e+06	1606446	2.10841e+06	3.25525e+06	2.91317e+06
Q99J77	Nans	0	0	975988	1.44216e+06	0	0
Q99J87	Dhx58	997347	1.28183e+06	1.11692e+06	1.04521e+06	1.2056e+06	991499
Q99J93	Ifitm2	0	0	0	0	0	0
Q99JF8-2	Psip1	1.99635e+06	1.86979e+06	2.84191e+06	1.94578e+06	3.51302e+06	2197449
Q99JH1	Rpp25l	0	761349	0	0	0	183887
Q99JI4	Psmd6	0	0	293173	1.36628e+06	480321	4359002
Q99JI6	Rap1b	3.18088e+06	4361596	10200000	24200000	6.3823e+06	3.34176e+06
Q99JR1	Sfxn1	3.90249e+06	4507303	4732901	4.89696e+06	5039859	5.97643e+06
Q99JR5	Tinagl1	0	0	745319	1.17507e+06	0	0
Q99JR8-2	Smarcd2	0	589427	899865	0	0	866615
Q99JT5	Krcc1	1.16031e+06	730164	840628	418856	1.12373e+06	0
Q99JX4	Eif3m	0	0	0	0	0	0
Q99JX7	Nxf1	0	0	0	0	0	0
Q99JY0	Hadhb	5042192	4042920	5254610	5717199	4.71748e+06	4.87284e+06
Q99JY3-2	Gimap4	0	0	1.12479e+06	3477913	0	0
Q99JY4	Trabd	862365	1.29781e+06	1.06438e+06	1.51129e+06	930570	1.30567e+06
Q99JY9	Actr3	7.22623e+06	5.99592e+06	8482141	9290074	6498486	7.83692e+06
Q99K41	Emilin1	0	0	973318	2.386e+06	0	0
Q99K48	Nono	2.21621e+06	2.32638e+06	1.93136e+06	2.2933e+06	3.03843e+06	3.25412e+06
Q99K51	Pls3	418559	0	2300429	1.93609e+06	1197819	794291
Q99K70	Rragc	3.58452e+06	3.15635e+06	3.17159e+06	3.17778e+06	1.19466e+06	2.3441e+06
Q99K85	Psat1	1.08164e+06	0	0	0	0	0
Q99KC8	Vwa5a	912673	1.0664e+06	1.88564e+06	3.03382e+06	2.17919e+06	1.46995e+06
Q99KI0	Aco2	2.34037e+06	2.72216e+06	4464395	5648752	3.99079e+06	3.07223e+06
Q99KI3	Emc3	2.21207e+06	651232	0	0	657903	0
Q99KJ8	Dctn2	923215	1.14744e+06	1.54945e+06	2.5927e+06	1.8383e+06	1.86667e+06
Q99KP6	Prpf19	4432764	1.99185e+06	4.19403e+06	3.17906e+06	5508557	3.19204e+06
Q99KQ4	Nampt	6.50807e+06	6625831	6.12617e+06	6222876	7549144	7433938
Q99KV1	Dnajb11	3746731	5.8721e+06	4178562	4806928	4445831	4.48606e+06
Q99KW3-1	Triobp	298411	524680	218297	577028	0	687506
Q99KY4-2	Gak	2103250	1.6784e+06	1.72489e+06	1.42021e+06	1.93516e+06	2.09706e+06
Q99L13	Hibadh	0	0	359600	1.9414e+06	0	0
Q99L43	Cds2	0	0	459076	1.10548e+06	0	0
Q99L45	Eif2s2	2.98512e+06	2.52485e+06	3.77582e+06	2.60617e+06	3491002	2.4326e+06
Q99L47	St13	0	0	1.367e+06	2.11613e+06	1.61537e+06	643492
Q99LB2	Dhrs4	0	0	0	0	0	0
Q99LB7	Sardh	0	0	0	0	0	0
Q99LC2	Cstf1	0	0	0	0	0	0
Q99LC3	Ndufa10	4586136	5549740	3.49412e+06	3.52113e+06	3.88529e+06	5971982
Q99LC5	Etfa	7637791	5028826	7898950	9890686	8599171	5650938
Q99LD8	Ddah2	1712106	0	727198	3.36976e+06	0	0
Q99LE6	Abcf2	1.99237e+06	1.60593e+06	1.56416e+06	1.20477e+06	2036369	1.41713e+06
[truncated: 814 more rows]

## Sheet: sup fig 1
sup fig 1
d	Snx9 releative expression (relateive to Rps18)
	NS							LPS 24hr
Control	1	1	1	1	1	1	1	0.636614	0.881378	0.863761	0.688107	1.03561	0.706831	0.831373
Snx9 Knockdown	0.161436	0.186914	0.24612	0.235322	0.265777	0.0788017	0.110054	0.175717	0.217247	0.192065	0.184236	0.267207	0.0707435	0.0984223
e	Snx9 releative expression (relateive to Rps18)
	NS							LPS 48hr
Control	1	1	1	1	1	1	1	0.713063	1.23596	0.704399	0.819134	1.39144	1.08987	1.61398
Snx9 Knockdown	0.267572	0.317158	0.278662	0.186184	0.189377	0.117197	0.10626	0.192232	0.233697	0.161572	0.175324	0.287467	0.116072	0.139617

## Sheet: sup fig 2
sup fig 2
b	NS							LPS							FHIN
Control	1	1	1	1	1	1	1	1.22781	1.09911	1.07359	1.09566	1.02375	1.0118	1.10515	1.17682	0.98707	0.915373	1.08228	1.05742	0.758452	0.817594
Snx9 Knockdown	0.846661	0.608484	0.584823	0.679318	0.788117	0.426577	0.520874	0.890053	0.673867	0.557585	0.596146	0.696566	0.597383	0.369529	0.713598	0.204235	0.575391	0.550828	0.63093	0.368287	0.247691

## Sheet: sup fig 3
sup fig 3
b	SNX9 relatitve expression (relative to beta-actin)
LPS	LPS FHIN
1	0.731168
1	0.964229
1	1.03548
